# Supplementary material for: Learning causal networks with latent variables from multivariate information in genomic data
Source: PLoS Comput Biol. 2017 Oct 2;13(10):e1005662. doi: 10.1371/journal.pcbi.1005662 (PMC5685645; doi:10.1371/journal.pcbi.1005662)
Supplement: S1 Data — This dataset contains all genomic data for the 20,415 human genes analyzed in Fig 4. (XLS) [file pcbi.1005662.s018.xls]

## Sheet: Feuille1
Ensembl ID (1)	Gene name (1)	Ohnolog (2,3)	SSD (2,4)	CNV (6)	CancerMutation (7,8)	Disease (9)	RecDominance (10)	Autoinhibition (2,11)	Essentiality (12)	ProteinComplex (13-17)	KaKSRatio (18, 19)	Expression (20, 21)
ENSG00000237613	FAM138A	N	Y	Y	NA	N	NA	N	NA	N	NA	NA
ENSG00000268020	AL627309.1	N	N	N	NA	N	NA	N	NA	N	NA	NA
ENSG00000186092	OR4F5	N	Y	Y	1	Y	NA	N	NA	N	>0.2	NA
ENSG00000235249	OR4F29	N	Y	Y	NA	N	NA	N	NA	N	>0.2	NA
ENSG00000185097	OR4F16	N	Y	Y	NA	N	NA	N	NA	N	>0.2	NA
ENSG00000269831	AL669831.1	N	Y	N	NA	N	NA	N	NA	N	NA	NA
ENSG00000269308	AL645608.2	N	N	N	NA	N	NA	N	NA	N	NA	NA
ENSG00000187634	SAMD11	Y	Y	Y	1	N	NA	N	NA	N	<0.2	NA
ENSG00000268179	AL645608.1	N	N	N	NA	N	NA	N	NA	N	NA	NA
ENSG00000188976	NOC2L	N	N	Y	1	N	NA	N	NA	Y	<0.2	NA
ENSG00000187961	KLHL17	N	N	Y	1	N	NA	N	NA	N	<0.2	B
ENSG00000187583	PLEKHN1	N	N	Y	1	N	NA	N	NA	N	NA	D
ENSG00000187642	C1orf170	N	N	Y	1	N	NA	N	NA	N	>0.2	B
ENSG00000188290	HES4	Y	N	Y	1	N	NA	N	NA	N	<0.2	C
ENSG00000187608	ISG15	N	N	Y	2	Y	NA	N	N	Y	>0.2	NA
ENSG00000188157	AGRN	N	N	Y	1	Y	AR	N	Y	N	<0.2	B
ENSG00000237330	RNF223	N	N	Y	NA	N	NA	N	NA	N	>0.2	C
ENSG00000131591	C1orf159	N	N	Y	1	N	NA	N	N	N	NA	B
ENSG00000162571	TTLL10	N	N	Y	1	N	NA	N	NA	N	<0.2	C
ENSG00000186891	TNFRSF18	N	N	Y	1	N	NA	N	N	N	NA	NA
ENSG00000186827	TNFRSF4	Y	N	Y	1	Y	NA	N	N	N	>0.2	B
ENSG00000078808	SDF4	N	N	Y	2	N	NA	N	NA	N	NA	NA
ENSG00000176022	B3GALT6	N	N	Y	1	Y	NA	N	NA	N	NA	B
ENSG00000184163	FAM132A	N	N	Y	1	N	NA	N	NA	N	<0.2	C
ENSG00000160087	UBE2J2	N	N	Y	2	N	NA	N	N	N	<0.2	NA
ENSG00000162572	SCNN1D	N	N	Y	1	N	NA	Y	NA	N	<0.2	B
ENSG00000131584	ACAP3	Y	N	Y	2	N	NA	Y	NA	N	<0.2	NA
ENSG00000169972	PUSL1	N	N	Y	1	N	NA	N	NA	N	<0.2	C
ENSG00000127054	CPSF3L	N	N	Y	1	N	NA	N	NA	Y	<0.2	NA
ENSG00000224051	GLTPD1	N	N	Y	1	N	NA	N	NA	N	<0.2	NA
ENSG00000169962	TAS1R3	Y	N	Y	1	Y	NA	N	N	N	<0.2	D
ENSG00000107404	DVL1	Y	N	Y	1	N	NA	N	Y	Y	<0.2	D
ENSG00000162576	MXRA8	N	N	Y	1	N	NA	N	N	N	NA	NA
ENSG00000175756	AURKAIP1	N	N	Y	1	N	NA	N	NA	N	NA	NA
ENSG00000221978	CCNL2	Y	N	Y	2	N	NA	N	NA	N	<0.2	B
ENSG00000224870	RP4-758J18.2	N	N	N	NA	N	NA	N	NA	N	NA	NA
ENSG00000242485	MRPL20	N	N	Y	1	N	NA	N	NA	Y	<0.2	B
ENSG00000235098	ANKRD65	N	N	Y	1	N	NA	N	NA	N	NA	NA
ENSG00000205116	TMEM88B	N	N	N	NA	N	NA	N	NA	N	NA	NA
ENSG00000179403	VWA1	N	N	Y	1	N	NA	N	NA	N	<0.2	NA
ENSG00000215915	ATAD3C	N	Y	Y	1	N	NA	N	NA	N	<0.2	NA
ENSG00000160072	ATAD3B	N	Y	Y	1	N	NA	N	NA	N	<0.2	NA
ENSG00000197785	ATAD3A	N	Y	Y	2	N	NA	N	NA	N	<0.2	NA
ENSG00000205090	TMEM240	N	N	Y	1	N	NA	N	NA	N	NA	B
ENSG00000160075	SSU72	N	N	Y	2	N	NA	N	NA	Y	NA	D
ENSG00000215014	AL645728.1	N	N	Y	NA	N	NA	N	NA	N	NA	NA
ENSG00000228594	C1orf233	N	N	Y	NA	N	NA	N	NA	N	NA	NA
ENSG00000197530	MIB2	N	N	Y	1	Y	NA	N	N	Y	>0.2	NA
ENSG00000189409	MMP23B	N	N	Y	1	Y	NA	N	NA	N	>0.2	NA
ENSG00000248333	CDK11B	N	Y	N	1	N	NA	N	NA	N	NA	NA
ENSG00000189339	SLC35E2B	Y	N	Y	1	N	NA	N	NA	N	<0.2	NA
ENSG00000008128	CDK11A	N	Y	Y	1	Y	NA	N	NA	Y	NA	NA
ENSG00000215790	SLC35E2	N	N	Y	2	N	NA	N	NA	N	<0.2	B
ENSG00000008130	NADK	N	N	Y	2	N	NA	N	N	N	<0.2	NA
ENSG00000078369	GNB1	Y	N	N	3	N	NA	N	Y	Y	<0.2	NA
ENSG00000169885	CALML6	N	N	N	2	N	NA	N	NA	N	<0.2	NA
ENSG00000178821	TMEM52	N	Y	Y	2	N	NA	N	N	N	NA	B
ENSG00000142609	C1orf222	N	N	N	3	N	NA	N	NA	N	<0.2	B
ENSG00000187730	GABRD	N	N	N	2	Y	AD	N	Y	N	<0.2	B
ENSG00000067606	PRKCZ	Y	N	N	3	N	NA	Y	N	Y	<0.2	D
ENSG00000162585	C1orf86	N	N	Y	1	N	NA	N	NA	Y	>0.2	NA
ENSG00000269554	AL590822.2	N	N	N	NA	N	NA	N	NA	N	NA	NA
ENSG00000203301	AL590822.1	N	N	N	NA	N	NA	N	NA	N	NA	B
ENSG00000157933	SKI	N	N	Y	1	Y	NA	N	Y	Y	NA	C
ENSG00000116151	MORN1	N	N	N	1	N	NA	N	NA	N	<0.2	NA
ENSG00000269753	AL589739.1	N	N	N	NA	N	NA	N	NA	N	NA	NA
ENSG00000157916	RER1	N	N	Y	1	N	NA	N	N	N	<0.2	D
ENSG00000157911	PEX10	N	N	Y	1	Y	AR	N	NA	N	<0.2	NA
ENSG00000149527	PLCH2	N	N	Y	2	N	NA	N	NA	N	<0.2	B
ENSG00000157881	PANK4	N	N	Y	2	N	NA	N	N	Y	<0.2	D
ENSG00000197921	HES5	N	N	Y	1	Y	NA	N	Y	Y	<0.2	C
ENSG00000157873	TNFRSF14	N	N	Y	3	N	NA	N	N	N	>0.2	D
ENSG00000157870	FAM213B	N	N	Y	1	N	NA	N	NA	N	<0.2	D
ENSG00000142606	MMEL1	Y	N	Y	1	Y	NA	N	Y	N	<0.2	C
ENSG00000215912	TTC34	N	N	Y	NA	N	NA	N	NA	N	>0.2	C
ENSG00000169717	ACTRT2	N	Y	N	3	N	NA	N	NA	N	<0.2	B
ENSG00000142611	PRDM16	Y	N	N	3	Y	NA	N	Y	Y	<0.2	NA
ENSG00000130762	ARHGEF16	Y	N	Y	2	N	NA	Y	NA	N	<0.2	NA
ENSG00000162591	MEGF6	N	N	Y	1	N	NA	N	NA	N	<0.2	C
ENSG00000158109	TPRG1L	N	N	Y	1	N	NA	N	NA	N	<0.2	C
ENSG00000116213	WRAP73	N	N	N	2	N	NA	N	NA	N	<0.2	NA
ENSG00000078900	TP73	Y	N	N	2	Y	NA	Y	Y	Y	<0.2	NA
ENSG00000162592	CCDC27	N	N	Y	2	N	NA	N	NA	N	>0.2	NA
ENSG00000235169	SMIM1	N	N	N	NA	N	NA	N	NA	N	NA	C
ENSG00000130764	LRRC47	N	N	Y	1	N	NA	N	NA	Y	<0.2	D
ENSG00000116198	CEP104	N	N	N	2	N	NA	N	NA	N	<0.2	NA
ENSG00000169598	DFFB	N	N	N	2	Y	NA	N	N	Y	<0.2	NA
ENSG00000198912	C1orf174	N	N	N	1	N	NA	N	NA	N	NA	D
ENSG00000196581	AJAP1	N	N	N	2	Y	NA	N	NA	Y	NA	B
ENSG00000131697	NPHP4	N	N	N	2	Y	AR	N	NA	N	<0.2	B
ENSG00000069424	KCNAB2	Y	N	N	1	Y	NA	N	Y	Y	<0.2	D
ENSG00000268332	AL035406.1	N	N	N	NA	N	NA	N	NA	N	NA	NA
ENSG00000116254	CHD5	Y	N	N	3	Y	NA	N	NA	N	NA	C
ENSG00000116251	RPL22	Y	N	Y	3	N	NA	N	N	Y	NA	D
ENSG00000158286	RNF207	N	N	Y	2	N	NA	N	NA	N	<0.2	NA
ENSG00000116237	ICMT	N	N	Y	1	N	NA	N	Y	N	NA	C
ENSG00000173673	HES3	N	N	Y	1	N	NA	N	NA	N	>0.2	C
ENSG00000158292	GPR153	N	N	Y	2	N	NA	N	NA	N	>0.2	D
ENSG00000097021	ACOT7	N	N	N	3	Y	NA	N	N	N	<0.2	NA
ENSG00000069812	HES2	N	N	Y	1	N	NA	N	NA	N	<0.2	C
ENSG00000187017	ESPN	Y	N	Y	1	Y	NA	N	NA	Y	>0.2	B
ENSG00000215788	TNFRSF25	N	N	Y	1	Y	NA	N	N	N	>0.2	D
ENSG00000171680	PLEKHG5	N	N	Y	1	Y	AR	N	N	N	<0.2	D
ENSG00000162408	NOL9	N	N	Y	2	N	NA	N	NA	N	<0.2	D
ENSG00000173662	TAS1R1	Y	N	Y	2	Y	NA	N	N	N	<0.2	C
ENSG00000204859	ZBTB48	N	N	Y	1	Y	NA	N	NA	N	<0.2	D
ENSG00000162413	KLHL21	Y	N	N	1	N	NA	N	NA	N	<0.2	D
ENSG00000116273	PHF13	N	N	Y	1	N	NA	N	Y	N	>0.2	D
ENSG00000041988	THAP3	N	N	N	2	N	NA	N	NA	N	>0.2	C
ENSG00000007923	DNAJC11	N	N	N	3	Y	NA	N	NA	N	<0.2	NA
ENSG00000171735	CAMTA1	Y	N	N	3	Y	NA	N	NA	Y	<0.2	D
ENSG00000049245	VAMP3	Y	N	N	3	Y	NA	N	N	Y	<0.2	D
ENSG00000049246	PER3	Y	N	N	1	Y	NA	N	N	N	>0.2	D
ENSG00000049247	UTS2	N	N	N	2	Y	NA	N	N	N	NA	C
ENSG00000049249	TNFRSF9	N	N	N	3	Y	NA	N	Y	N	>0.2	C
ENSG00000116288	PARK7	N	N	N	2	Y	AR	N	N	Y	<0.2	D
ENSG00000116285	ERRFI1	N	N	N	2	Y	NA	N	Y	N	>0.2	NA
ENSG00000162426	SLC45A1	N	N	N	2	N	NA	N	NA	N	<0.2	B
ENSG00000142599	RERE	N	N	N	1	Y	NA	N	Y	N	<0.2	NA
ENSG00000074800	ENO1	Y	N	N	1	Y	NA	N	NA	Y	<0.2	NA
ENSG00000131686	CA6	N	N	N	3	Y	NA	N	N	N	<0.2	C
ENSG00000197241	SLC2A7	Y	Y	N	2	N	NA	N	NA	N	<0.2	C
ENSG00000142583	SLC2A5	Y	Y	N	3	Y	NA	N	N	N	<0.2	NA
ENSG00000180758	GPR157	N	N	N	1	N	NA	N	NA	N	<0.2	C
ENSG00000049239	H6PD	N	N	N	1	Y	AR	N	N	N	<0.2	D
ENSG00000171621	SPSB1	Y	N	N	1	N	NA	N	N	N	<0.2	C
ENSG00000171612	SLC25A33	Y	N	N	1	N	NA	N	NA	N	<0.2	NA
ENSG00000188807	TMEM201	N	N	N	1	N	NA	N	NA	N	NA	C
ENSG00000171608	PIK3CD	Y	N	N	1	Y	NA	N	N	Y	<0.2	B
ENSG00000179840	C1orf200	N	N	N	3	N	NA	N	NA	N	NA	NA
ENSG00000171603	CLSTN1	Y	N	N	2	Y	NA	N	N	N	<0.2	NA
ENSG00000178585	CTNNBIP1	N	N	N	1	Y	NA	N	Y	Y	>0.2	D
ENSG00000162441	LZIC	N	N	N	2	N	NA	N	NA	N	<0.2	D
ENSG00000173614	NMNAT1	N	N	N	1	Y	NA	N	Y	N	<0.2	C
ENSG00000162444	RBP7	Y	N	N	1	N	NA	N	N	N	<0.2	D
ENSG00000130939	UBE4B	N	N	N	3	Y	NA	N	Y	Y	<0.2	NA
ENSG00000054523	KIF1B	Y	N	N	2	Y	AD	Y	Y	Y	<0.2	D
ENSG00000142657	PGD	N	N	N	1	Y	NA	N	NA	N	<0.2	D
ENSG00000251503	APITD1-CORT	N	Y	N	NA	N	NA	N	NA	N	>0.2	D
ENSG00000175279	APITD1	N	Y	N	2	Y	NA	N	NA	Y	>0.2	C
ENSG00000241563	CORT	N	Y	N	1	N	NA	N	N	N	NA	D
ENSG00000160049	DFFA	N	N	N	2	Y	NA	N	N	Y	>0.2	D
ENSG00000142655	PEX14	N	N	N	1	Y	AR	N	Y	Y	<0.2	D
ENSG00000130940	CASZ1	N	N	N	2	Y	NA	N	NA	N	NA	D
ENSG00000175262	C1orf127	N	N	N	3	N	NA	N	NA	N	NA	NA
ENSG00000120948	TARDBP	N	N	N	2	Y	AD	N	Y	Y	<0.2	D
ENSG00000009724	MASP2	Y	N	N	2	Y	NA	N	N	Y	<0.2	C
ENSG00000116649	SRM	N	N	N	1	Y	NA	N	NA	Y	<0.2	D
ENSG00000171824	EXOSC10	N	N	N	1	N	NA	N	NA	Y	<0.2	NA
ENSG00000198793	MTOR	Y	N	N	3	Y	NA	N	Y	Y	<0.2	D
ENSG00000171819	ANGPTL7	N	N	N	1	N	NA	N	N	N	<0.2	B
ENSG00000120942	UBIAD1	N	N	N	2	Y	AD	N	NA	N	<0.2	D
ENSG00000204624	PTCHD2	N	N	N	3	N	NA	N	NA	N	<0.2	NA
ENSG00000116661	FBXO2	N	N	N	2	N	NA	N	N	Y	<0.2	NA
ENSG00000132879	FBXO44	N	Y	N	1	N	NA	N	NA	N	>0.2	D
ENSG00000116663	FBXO6	N	Y	N	1	N	NA	N	NA	Y	<0.2	NA
ENSG00000116670	MAD2L2	N	N	N	1	N	NA	N	Y	N	<0.2	C
ENSG00000162490	DRAXIN	N	N	N	1	N	NA	N	N	N	>0.2	D
ENSG00000177674	AGTRAP	N	N	N	2	N	NA	N	N	N	<0.2	NA
ENSG00000215910	C1orf167	N	N	N	1	N	NA	N	NA	N	>0.2	C
ENSG00000177000	MTHFR	N	N	N	3	Y	AD	N	Y	N	<0.2	D
ENSG00000011021	CLCN6	N	N	N	2	N	NA	N	N	N	<0.2	NA
ENSG00000175206	NPPA	N	N	N	3	Y	AD	N	N	N	NA	NA
ENSG00000120937	NPPB	N	N	N	3	Y	NA	N	N	N	NA	B
ENSG00000116685	KIAA2013	N	N	N	1	N	NA	N	NA	Y	<0.2	D
ENSG00000083444	PLOD1	Y	N	N	2	Y	AR	N	Y	Y	<0.2	D
ENSG00000116688	MFN2	N	N	N	1	Y	AD	N	Y	N	<0.2	NA
ENSG00000116691	MIIP	N	N	N	2	Y	NA	N	NA	N	<0.2	D
ENSG00000120949	TNFRSF8	N	N	N	2	N	NA	N	N	Y	>0.2	B
ENSG00000028137	TNFRSF1B	Y	N	Y	1	Y	NA	N	Y	Y	>0.2	C
ENSG00000048707	VPS13D	N	N	N	2	N	NA	N	NA	N	<0.2	C
ENSG00000162496	DHRS3	N	N	N	1	N	NA	N	N	N	<0.2	D
ENSG00000204518	AADACL4	Y	Y	N	2	N	NA	N	NA	N	<0.2	NA
ENSG00000188984	AADACL3	N	Y	Y	3	N	NA	N	NA	N	<0.2	C
ENSG00000157330	C1orf158	N	N	Y	2	N	NA	N	NA	N	<0.2	C
ENSG00000116726	PRAMEF12	N	Y	Y	2	N	NA	N	NA	N	>0.2	D
ENSG00000116721	PRAMEF1	N	Y	Y	3	N	NA	N	NA	N	>0.2	NA
ENSG00000204513	PRAMEF11	N	Y	Y	3	N	NA	N	NA	N	>0.2	C
ENSG00000179172	HNRNPCL1	N	Y	Y	3	N	NA	N	NA	Y	>0.2	D
ENSG00000120952	PRAMEF2	N	Y	Y	3	N	NA	N	NA	N	>0.2	NA
ENSG00000243073	PRAMEF4	N	Y	Y	3	N	NA	N	NA	N	>0.2	C
ENSG00000187545	PRAMEF10	N	Y	Y	1	N	NA	N	NA	N	NA	B
ENSG00000204510	PRAMEF7	N	Y	Y	1	N	NA	N	NA	N	>0.2	NA
ENSG00000232423	PRAMEF6	N	Y	Y	1	N	NA	N	NA	N	>0.2	C
ENSG00000204508	PRAMEF22	N	Y	Y	1	N	NA	N	NA	N	>0.2	NA
ENSG00000239810	WI2-3308P17.2	N	N	Y	2	N	NA	N	NA	N	NA	NA
ENSG00000229571	WI2-2994D6.2	N	Y	Y	1	N	NA	N	NA	N	>0.2	C
ENSG00000204503	PRAMEF3	N	Y	Y	1	N	NA	N	NA	N	NA	NA
ENSG00000204502	PRAMEF5	N	Y	Y	1	N	NA	N	NA	N	>0.2	C
ENSG00000182330	PRAMEF8	N	Y	Y	NA	N	NA	N	NA	N	>0.2	NA
ENSG00000204501	PRAMEF9	N	Y	Y	NA	N	NA	N	NA	N	>0.2	C
ENSG00000204495	PRAMEF13	N	Y	Y	1	N	NA	N	NA	N	>0.2	NA
ENSG00000204491	PRAMEF18	N	Y	Y	1	N	NA	N	NA	N	NA	NA
ENSG00000204488	PRAMEF16	N	Y	Y	1	N	NA	N	NA	N	NA	NA
ENSG00000204486	PRAMEF21	N	Y	Y	1	N	NA	N	NA	N	>0.2	NA
ENSG00000157358	PRAMEF15	N	Y	Y	NA	N	NA	N	NA	N	>0.2	C
ENSG00000204481	PRAMEF14	N	Y	Y	1	N	NA	N	NA	N	>0.2	NA
ENSG00000204480	PRAMEF19	N	Y	Y	1	N	NA	N	NA	N	NA	NA
ENSG00000204479	PRAMEF17	N	Y	Y	1	N	NA	N	NA	N	NA	NA
ENSG00000204478	PRAMEF20	N	Y	Y	1	N	NA	N	NA	N	>0.2	NA
ENSG00000162494	LRRC38	Y	N	N	NA	N	NA	N	NA	N	<0.2	C
ENSG00000162493	PDPN	N	N	N	3	Y	NA	N	Y	N	NA	C
ENSG00000116731	PRDM2	N	N	N	2	Y	NA	N	Y	N	>0.2	D
ENSG00000218328	C1orf196	N	N	N	NA	N	NA	N	NA	N	NA	NA
ENSG00000189337	KAZN	N	N	N	2	N	NA	N	NA	N	<0.2	D
ENSG00000171729	TMEM51	N	N	N	3	N	NA	N	NA	N	NA	NA
ENSG00000204464	C1orf195	N	N	N	NA	N	NA	N	NA	N	NA	NA
ENSG00000142621	FHAD1	N	N	N	1	N	NA	N	NA	N	<0.2	C
ENSG00000142634	EFHD2	Y	N	N	1	N	NA	N	NA	N	NA	NA
ENSG00000162438	CTRC	N	N	N	2	Y	AD	N	N	N	<0.2	D
ENSG00000142615	CELA2A	N	Y	N	2	N	NA	N	NA	N	<0.2	C
ENSG00000215704	CELA2B	N	Y	N	2	N	NA	N	NA	N	<0.2	C
ENSG00000132906	CASP9	N	N	N	2	Y	NA	N	Y	Y	<0.2	NA
ENSG00000116138	DNAJC16	N	N	N	1	N	NA	N	N	N	<0.2	C
ENSG00000116771	AGMAT	N	N	N	2	Y	NA	N	NA	Y	<0.2	C
ENSG00000197312	DDI2	N	N	N	3	N	NA	N	NA	N	NA	C
ENSG00000215695	RSC1A1	N	N	N	1	N	NA	N	N	N	>0.2	C
ENSG00000116786	PLEKHM2	N	N	N	2	N	NA	Y	NA	Y	<0.2	D
ENSG00000162461	SLC25A34	Y	N	Y	1	N	NA	N	NA	N	<0.2	C
ENSG00000162460	TMEM82	N	N	Y	2	N	NA	N	NA	N	NA	NA
ENSG00000162458	FBLIM1	Y	N	N	2	Y	NA	N	N	N	<0.2	C
ENSG00000065526	SPEN	N	N	N	2	N	NA	N	Y	Y	>0.2	C
ENSG00000116809	ZBTB17	N	N	N	1	Y	NA	N	Y	Y	<0.2	NA
ENSG00000183888	C1orf64	N	N	N	2	N	NA	N	NA	N	NA	C
ENSG00000173641	HSPB7	N	N	Y	2	Y	NA	N	NA	N	>0.2	NA
ENSG00000186510	CLCNKA	Y	Y	Y	2	Y	AR	N	NA	N	<0.2	NA
ENSG00000184908	CLCNKB	Y	Y	Y	1	Y	AR	N	NA	N	>0.2	NA
ENSG00000185519	FAM131C	N	N	Y	1	N	NA	N	NA	N	NA	B
ENSG00000142627	EPHA2	Y	N	N	3	Y	AD	Y	N	Y	<0.2	C
ENSG00000142632	ARHGEF19	Y	N	N	1	N	NA	Y	NA	N	<0.2	NA
ENSG00000237276	C1ORF224	N	N	N	NA	N	NA	N	NA	N	NA	NA
ENSG00000132881	RSG1	N	N	N	1	N	NA	N	NA	N	<0.2	NA
ENSG00000204377	C1orf134	N	N	N	NA	N	NA	N	NA	N	NA	NA
ENSG00000037637	FBXO42	N	N	N	2	N	NA	N	NA	N	<0.2	D
ENSG00000055070	SZRD1	N	N	N	2	N	NA	N	NA	N	<0.2	D
ENSG00000187144	SPATA21	N	Y	N	2	Y	NA	N	NA	N	>0.2	C
ENSG00000157191	NECAP2	N	N	Y	2	N	NA	N	NA	Y	<0.2	NA
ENSG00000197511	AL355149.1	N	Y	Y	NA	N	NA	N	NA	N	NA	NA
ENSG00000268674	AL355149.3	N	Y	N	NA	N	NA	N	NA	N	NA	NA
ENSG00000237847	AL137798.1	N	Y	Y	NA	N	NA	N	NA	N	NA	NA
ENSG00000268991	AL021920.2	N	Y	N	NA	N	NA	N	NA	N	NA	NA
ENSG00000186715	MST1L	Y	Y	N	2	N	NA	N	NA	N	NA	C
ENSG00000196690	BX284668.1	N	Y	Y	1	N	NA	N	NA	N	NA	NA
ENSG00000058453	CROCC	N	N	Y	2	Y	NA	N	N	Y	NA	D
ENSG00000117122	MFAP2	N	N	Y	1	Y	NA	N	N	N	NA	B
ENSG00000159363	ATP13A2	Y	N	Y	2	Y	AR	N	N	N	<0.2	D
ENSG00000117118	SDHB	N	N	Y	2	Y	AD	N	NA	Y	<0.2	D
ENSG00000117115	PADI2	N	Y	Y	2	N	NA	N	NA	N	<0.2	D
ENSG00000142623	PADI1	N	Y	N	3	N	NA	N	NA	N	<0.2	NA
ENSG00000142619	PADI3	N	Y	N	2	N	NA	N	NA	N	<0.2	B
ENSG00000159339	PADI4	N	Y	N	2	Y	NA	N	N	N	<0.2	C
ENSG00000269468	AC004824.2	N	Y	N	NA	N	NA	N	NA	N	NA	NA
ENSG00000179051	RCC2	N	N	N	2	N	NA	N	NA	Y	<0.2	NA
ENSG00000074964	ARHGEF10L	N	N	N	3	N	NA	N	NA	N	<0.2	NA
ENSG00000117148	ACTL8	N	Y	N	3	N	NA	N	NA	N	<0.2	D
ENSG00000117154	IGSF21	N	N	N	3	N	NA	N	NA	N	>0.2	B
ENSG00000179023	KLHDC7A	N	N	N	1	N	NA	N	NA	N	<0.2	B
ENSG00000009709	PAX7	Y	N	N	3	Y	AR	N	Y	N	<0.2	B
ENSG00000179002	TAS1R2	Y	N	N	3	Y	NA	N	N	N	<0.2	C
ENSG00000255275	RP13-279N23.2	N	Y	N	NA	N	NA	N	NA	N	NA	NA
ENSG00000159423	ALDH4A1	N	N	N	3	Y	AR	N	NA	N	<0.2	B
ENSG00000169991	IFFO2	N	Y	N	1	N	NA	N	NA	N	NA	D
ENSG00000127481	UBR4	N	N	N	2	N	NA	N	Y	Y	<0.2	D
ENSG00000127463	EMC1	N	N	N	1	N	NA	N	NA	Y	<0.2	B
ENSG00000053372	MRTO4	N	N	N	2	N	NA	N	NA	Y	NA	NA
ENSG00000162482	AKR7A3	N	Y	N	1	Y	NA	N	NA	N	>0.2	NA
ENSG00000053371	AKR7A2	N	Y	N	1	Y	NA	N	NA	N	>0.2	D
ENSG00000040487	PQLC2	Y	N	N	2	N	NA	N	NA	N	<0.2	D
ENSG00000077549	CAPZB	N	N	N	1	N	NA	N	NA	Y	NA	D
ENSG00000173436	MINOS1	N	N	N	1	N	NA	N	NA	N	<0.2	NA
ENSG00000158747	NBL1	N	Y	N	1	Y	NA	N	N	N	<0.2	D
ENSG00000158748	HTR6	N	N	N	2	Y	NA	N	N	N	<0.2	D
ENSG00000162542	TMCO4	N	N	N	1	N	NA	N	NA	N	<0.2	C
ENSG00000178828	RNF186	N	N	N	1	N	NA	N	NA	N	>0.2	B
ENSG00000169914	OTUD3	N	N	N	1	N	NA	N	NA	N	<0.2	C
ENSG00000188784	PLA2G2E	N	Y	N	3	Y	NA	N	NA	N	<0.2	B
ENSG00000188257	PLA2G2A	N	Y	N	3	Y	AD	N	NA	N	<0.2	NA
ENSG00000127472	PLA2G5	N	Y	N	3	Y	NA	N	N	N	<0.2	D
ENSG00000117215	PLA2G2D	N	Y	N	1	Y	NA	N	NA	N	>0.2	C
ENSG00000158786	PLA2G2F	N	Y	N	3	Y	NA	N	NA	N	NA	B
ENSG00000187980	PLA2G2C	N	Y	N	2	N	NA	N	NA	N	>0.2	C
ENSG00000162543	UBXN10	N	N	N	3	N	NA	N	NA	N	>0.2	NA
ENSG00000158816	VWA5B1	Y	N	N	1	N	NA	N	NA	N	<0.2	C
ENSG00000162545	CAMK2N1	N	N	Y	1	N	NA	N	NA	N	NA	D
ENSG00000090432	MUL1	N	N	N	2	N	NA	N	NA	N	<0.2	C
ENSG00000183114	FAM43B	Y	N	N	1	N	NA	N	NA	N	<0.2	D
ENSG00000158825	CDA	N	N	N	3	Y	NA	N	NA	Y	<0.2	B
ENSG00000158828	PINK1	N	N	N	1	Y	AR	N	N	Y	<0.2	NA
ENSG00000244038	DDOST	N	N	N	1	Y	NA	N	NA	Y	<0.2	NA
ENSG00000117245	KIF17	N	N	N	2	Y	NA	Y	N	Y	<0.2	B
ENSG00000189410	SH2D5	N	N	N	1	N	NA	N	NA	N	<0.2	C
ENSG00000127483	HP1BP3	N	N	N	2	N	NA	N	NA	Y	<0.2	NA
ENSG00000075151	EIF4G3	Y	N	N	3	N	NA	N	N	Y	<0.2	NA
ENSG00000117298	ECE1	Y	N	N	2	Y	AD	N	Y	Y	<0.2	D
ENSG00000142794	NBPF3	N	Y	Y	2	N	NA	N	NA	N	NA	NA
ENSG00000162551	ALPL	N	N	Y	2	Y	AD	N	Y	N	<0.2	NA
ENSG00000076864	RAP1GAP	Y	N	Y	3	N	NA	N	NA	Y	<0.2	D
ENSG00000090686	USP48	N	N	Y	2	N	NA	N	NA	Y	<0.2	D
ENSG00000187942	LDLRAD2	N	N	Y	2	N	NA	N	NA	N	<0.2	NA
ENSG00000142798	HSPG2	N	N	Y	2	Y	AR	Y	Y	Y	<0.2	NA
ENSG00000219073	CELA3B	N	Y	Y	1	N	NA	N	NA	N	<0.2	NA
ENSG00000142789	CELA3A	Y	Y	Y	3	Y	NA	N	NA	N	<0.2	NA
ENSG00000070831	CDC42	N	N	N	3	Y	NA	N	Y	Y	<0.2	C
ENSG00000162552	WNT4	N	N	N	1	Y	AD	N	Y	N	<0.2	NA
ENSG00000184677	ZBTB40	N	N	N	1	Y	NA	N	NA	N	>0.2	D
ENSG00000070886	EPHA8	Y	N	N	3	Y	NA	Y	NA	N	<0.2	NA
ENSG00000173372	C1QA	Y	N	Y	2	Y	NA	N	Y	Y	NA	D
ENSG00000159189	C1QC	Y	N	Y	3	Y	NA	N	NA	Y	>0.2	C
ENSG00000173369	C1QB	Y	N	Y	3	Y	NA	N	N	Y	>0.2	D
ENSG00000133216	EPHB2	Y	N	N	3	Y	AD	Y	Y	Y	<0.2	C
ENSG00000215906	LACTBL1	N	N	N	NA	N	NA	N	NA	N	NA	NA
ENSG00000227868	RP4-805N21.1	N	N	N	NA	N	NA	N	NA	N	NA	NA
ENSG00000004487	KDM1A	N	N	N	2	N	NA	N	Y	Y	<0.2	NA
ENSG00000169641	LUZP1	N	N	N	2	N	NA	N	NA	N	>0.2	D
ENSG00000179546	HTR1D	N	N	N	2	N	NA	N	N	Y	<0.2	B
ENSG00000125944	HNRNPR	Y	N	N	3	N	NA	N	NA	Y	NA	NA
ENSG00000125945	ZNF436	N	Y	N	2	N	NA	N	NA	N	<0.2	C
ENSG00000249087	C1orf213	N	N	N	1	N	NA	N	NA	N	NA	NA
ENSG00000204219	TCEA3	Y	N	N	1	N	NA	N	NA	N	<0.2	C
ENSG00000088280	ASAP3	Y	N	N	1	Y	NA	Y	NA	N	<0.2	D
ENSG00000007968	E2F2	Y	N	N	2	Y	NA	N	Y	Y	<0.2	B
ENSG00000117318	ID3	N	N	N	3	Y	NA	N	Y	N	>0.2	NA
ENSG00000197880	MDS2	N	N	N	1	N	NA	N	NA	N	NA	NA
ENSG00000142676	RPL11	N	N	N	3	Y	NA	N	NA	Y	<0.2	D
ENSG00000011007	TCEB3	N	Y	N	1	N	NA	N	Y	Y	>0.2	D
ENSG00000057757	PITHD1	N	N	N	2	N	NA	N	NA	N	<0.2	D
ENSG00000011009	LYPLA2	Y	N	N	2	N	NA	N	NA	N	<0.2	NA
ENSG00000117308	GALE	N	N	N	1	Y	AR	N	NA	N	<0.2	B
ENSG00000117305	HMGCL	Y	N	N	1	Y	AR	N	Y	N	<0.2	D
ENSG00000179163	FUCA1	Y	N	N	1	Y	AR	N	NA	N	<0.2	D
ENSG00000188822	CNR2	Y	N	N	3	Y	NA	N	N	N	>0.2	C
ENSG00000189266	PNRC2	N	Y	N	NA	N	NA	N	NA	N	>0.2	NA
ENSG00000188529	SRSF10	Y	Y	N	1	N	NA	N	NA	Y	<0.2	C
ENSG00000142661	MYOM3	Y	N	N	2	N	NA	N	NA	N	<0.2	C
ENSG00000142677	IL22RA1	N	N	N	1	N	NA	N	N	N	>0.2	B
ENSG00000185436	IL28RA	N	N	N	2	N	NA	N	N	N	NA	C
ENSG00000158055	GRHL3	Y	N	N	1	N	NA	N	Y	N	<0.2	C
ENSG00000001460	STPG1	N	N	N	3	N	NA	N	NA	N	NA	B
ENSG00000001461	NIPAL3	Y	N	N	1	N	NA	N	N	N	>0.2	D
ENSG00000117602	RCAN3	N	N	N	2	N	NA	N	NA	N	<0.2	NA
ENSG00000184454	NCMAP	N	N	N	2	N	NA	N	NA	N	NA	NA
ENSG00000133226	SRRM1	N	N	N	2	N	NA	N	NA	Y	<0.2	NA
ENSG00000169504	CLIC4	Y	N	N	2	N	NA	N	N	Y	<0.2	D
ENSG00000020633	RUNX3	Y	N	N	3	Y	NA	N	N	N	<0.2	NA
ENSG00000117614	SYF2	N	N	Y	2	N	NA	N	Y	Y	NA	NA
ENSG00000117616	C1orf63	N	N	Y	1	N	NA	N	NA	N	NA	NA
ENSG00000187010	RHD	N	Y	Y	1	Y	NA	N	NA	N	>0.2	B
ENSG00000183726	TMEM50A	Y	N	Y	1	N	NA	N	N	Y	<0.2	NA
ENSG00000188672	RHCE	N	Y	N	2	Y	NA	N	NA	N	>0.2	NA
ENSG00000204178	TMEM57	N	N	N	3	N	NA	N	NA	N	<0.2	NA
ENSG00000157978	LDLRAP1	N	N	N	2	Y	NA	N	N	N	>0.2	D
ENSG00000117643	MAN1C1	Y	N	N	2	N	NA	N	NA	N	<0.2	C
ENSG00000162430	SEPN1	N	N	N	1	Y	AR	N	N	N	<0.2	C
ENSG00000255054	RP1-317E23.6	N	N	N	NA	N	NA	N	NA	N	<0.2	NA
ENSG00000117640	FAM54B	N	N	N	1	N	NA	N	NA	N	NA	NA
ENSG00000223474	AL020996.1	N	N	N	NA	N	NA	N	NA	N	NA	NA
ENSG00000127423	AUNIP	N	N	N	1	N	NA	N	NA	N	NA	C
ENSG00000182749	PAQR7	Y	N	N	1	N	NA	N	N	N	<0.2	B
ENSG00000117632	STMN1	Y	N	N	2	Y	NA	N	N	Y	<0.2	NA
ENSG00000158006	PAFAH2	N	N	N	2	N	NA	N	N	N	<0.2	NA
ENSG00000158008	EXTL1	Y	N	N	1	Y	NA	N	NA	N	<0.2	D
ENSG00000158014	SLC30A2	Y	N	N	2	Y	NA	N	NA	N	<0.2	C
ENSG00000158022	TRIM63	N	N	N	3	Y	NA	N	Y	Y	<0.2	D
ENSG00000175087	PDIK1L	Y	N	N	1	N	NA	N	NA	N	<0.2	C
ENSG00000197245	FAM110D	N	N	N	1	N	NA	N	NA	N	NA	C
ENSG00000142684	ZNF593	N	N	N	2	N	NA	N	NA	Y	<0.2	D
ENSG00000142675	CNKSR1	Y	N	N	2	Y	NA	Y	NA	Y	<0.2	D
ENSG00000188782	CATSPER4	N	N	N	2	Y	NA	N	Y	N	<0.2	NA
ENSG00000130695	CEP85	Y	N	N	2	N	NA	N	NA	N	<0.2	NA
ENSG00000142669	SH3BGRL3	Y	N	N	NA	N	NA	N	NA	Y	>0.2	NA
ENSG00000158062	UBXN11	N	N	N	2	N	NA	N	NA	N	<0.2	D
ENSG00000169442	CD52	N	N	N	3	Y	NA	N	NA	N	NA	D
ENSG00000176092	AIM1L	N	N	N	2	N	NA	N	NA	N	>0.2	D
ENSG00000176083	ZNF683	Y	N	N	3	N	NA	N	N	N	<0.2	B
ENSG00000131914	LIN28A	Y	N	N	2	Y	NA	N	Y	N	<0.2	C
ENSG00000117682	DHDDS	N	N	N	2	Y	NA	N	NA	N	<0.2	D
ENSG00000198830	HMGN2	N	Y	N	1	N	NA	N	NA	N	NA	NA
ENSG00000117676	RPS6KA1	Y	N	N	1	Y	NA	Y	NA	N	<0.2	D
ENSG00000117713	ARID1A	Y	N	N	3	Y	NA	N	Y	Y	<0.2	NA
ENSG00000060642	PIGV	N	N	N	1	Y	NA	N	NA	N	>0.2	D
ENSG00000204160	ZDHHC18	Y	N	N	1	N	NA	N	NA	N	<0.2	B
ENSG00000175793	SFN	Y	N	Y	1	N	NA	N	N	Y	<0.2	C
ENSG00000142751	GPN2	N	N	Y	2	N	NA	N	NA	N	<0.2	C
ENSG00000198746	GPATCH3	N	N	Y	1	N	NA	N	NA	N	<0.2	B
ENSG00000090273	NUDC	N	N	Y	1	Y	NA	N	NA	Y	<0.2	B
ENSG00000131910	NR0B2	N	N	Y	1	Y	AR	N	N	Y	>0.2	B
ENSG00000175707	C1orf172	N	N	Y	2	N	NA	N	NA	N	NA	B
ENSG00000253368	TRNP1	N	N	N	1	N	NA	N	NA	N	NA	NA
ENSG00000158246	FAM46B	Y	N	N	2	N	NA	N	NA	N	<0.2	B
ENSG00000090020	SLC9A1	N	N	N	2	N	NA	N	N	Y	<0.2	D
ENSG00000142784	WDTC1	N	N	N	1	N	NA	N	Y	N	<0.2	C
ENSG00000186501	TMEM222	N	N	N	2	N	NA	N	NA	N	<0.2	D
ENSG00000142765	SYTL1	N	N	Y	2	N	NA	N	N	N	<0.2	B
ENSG00000142733	MAP3K6	N	N	Y	2	N	NA	Y	NA	N	<0.2	B
ENSG00000142748	FCN3	N	N	Y	2	Y	NA	N	NA	Y	<0.2	B
ENSG00000174950	CD164L2	N	N	Y	2	N	NA	N	N	N	NA	B
ENSG00000181773	GPR3	Y	N	Y	1	N	NA	N	N	N	>0.2	D
ENSG00000158195	WASF2	Y	N	N	2	Y	NA	N	Y	Y	>0.2	D
ENSG00000126705	AHDC1	N	N	Y	1	N	NA	N	NA	N	NA	C
ENSG00000000938	FGR	Y	N	N	1	Y	NA	Y	N	N	<0.2	NA
ENSG00000126709	IFI6	N	N	N	1	Y	NA	N	NA	N	NA	D
ENSG00000009780	FAM76A	Y	N	N	1	N	NA	N	NA	N	<0.2	NA
ENSG00000117758	STX12	Y	N	N	2	N	NA	N	NA	Y	<0.2	D
ENSG00000117751	PPP1R8	N	N	N	1	N	NA	N	Y	Y	<0.2	NA
ENSG00000268552	AL109927.1	N	N	N	NA	N	NA	N	NA	N	NA	D
ENSG00000130775	THEMIS2	N	N	N	1	Y	NA	N	NA	N	NA	NA
ENSG00000117748	RPA2	N	Y	N	2	Y	NA	N	NA	Y	<0.2	D
ENSG00000130768	SMPDL3B	N	N	N	2	N	NA	N	NA	N	<0.2	B
ENSG00000158156	XKR8	N	N	N	1	N	NA	N	NA	N	<0.2	D
ENSG00000158161	EYA3	Y	N	N	2	N	NA	N	N	Y	<0.2	B
ENSG00000169403	PTAFR	N	N	N	3	Y	NA	N	N	Y	>0.2	D
ENSG00000215902	AL353354.1	N	N	N	NA	N	NA	N	NA	N	NA	D
ENSG00000126698	DNAJC8	N	N	N	1	N	NA	N	NA	Y	<0.2	D
ENSG00000269804	AL353354.2	N	N	N	NA	N	NA	N	NA	N	NA	NA
ENSG00000130770	ATPIF1	N	N	N	3	Y	NA	N	NA	Y	NA	NA
ENSG00000130766	SESN2	Y	N	N	3	Y	NA	N	N	N	<0.2	D
ENSG00000130772	MED18	N	N	N	3	N	NA	N	NA	Y	<0.2	C
ENSG00000204138	PHACTR4	Y	N	N	3	N	NA	N	N	N	<0.2	NA
ENSG00000180198	RCC1	N	N	N	3	N	NA	N	NA	Y	<0.2	NA
ENSG00000180098	TRNAU1AP	N	Y	N	1	N	NA	N	NA	N	<0.2	NA
ENSG00000120656	TAF12	N	N	N	2	N	NA	N	NA	Y	<0.2	NA
ENSG00000188060	RAB42	Y	N	N	1	N	NA	N	NA	N	NA	NA
ENSG00000162419	GMEB1	N	N	N	1	N	NA	N	NA	N	<0.2	NA
ENSG00000198492	YTHDF2	Y	N	N	2	Y	NA	N	NA	N	<0.2	D
ENSG00000116329	OPRD1	Y	N	N	2	Y	NA	N	N	N	NA	B
ENSG00000159023	EPB41	Y	N	N	2	Y	AD	N	NA	Y	<0.2	B
ENSG00000253304	TMEM200B	N	N	N	1	N	NA	N	NA	N	>0.2	NA
ENSG00000116350	SRSF4	N	N	N	2	N	NA	N	NA	Y	NA	D
ENSG00000116353	MECR	N	N	N	2	N	NA	N	NA	N	<0.2	D
ENSG00000060656	PTPRU	N	N	N	3	N	NA	N	NA	N	<0.2	NA
ENSG00000162510	MATN1	N	N	N	1	N	NA	N	N	N	<0.2	B
ENSG00000162511	LAPTM5	N	N	N	2	N	NA	N	N	N	NA	NA
ENSG00000162512	SDC3	Y	N	N	2	Y	AR	N	N	Y	>0.2	D
ENSG00000134644	PUM1	Y	N	N	2	N	NA	N	N	Y	<0.2	NA
ENSG00000084628	NKAIN1	Y	N	N	2	N	NA	N	NA	N	<0.2	B
ENSG00000060688	SNRNP40	N	N	Y	1	N	NA	N	NA	Y	<0.2	NA
ENSG00000121766	ZCCHC17	N	N	Y	3	N	NA	N	NA	N	<0.2	D
ENSG00000121769	FABP3	Y	N	Y	3	Y	NA	N	NA	N	<0.2	C
ENSG00000168528	SERINC2	Y	N	Y	2	N	NA	N	NA	N	<0.2	C
ENSG00000268950	AC114494.1	N	N	N	NA	N	NA	N	NA	N	NA	B
ENSG00000142910	TINAGL1	N	N	Y	2	N	NA	N	N	N	<0.2	NA
ENSG00000121764	HCRTR1	Y	N	Y	1	Y	NA	N	N	N	<0.2	C
ENSG00000162517	PEF1	N	N	Y	1	N	NA	N	NA	Y	<0.2	D
ENSG00000084636	COL16A1	Y	N	Y	1	N	NA	N	NA	N	>0.2	D
ENSG00000121753	BAI2	Y	N	Y	2	N	NA	N	NA	Y	>0.2	C
ENSG00000134668	SPOCD1	Y	N	Y	2	N	NA	N	NA	N	>0.2	C
ENSG00000184007	PTP4A2	Y	N	Y	2	Y	NA	N	N	N	<0.2	NA
ENSG00000212673	100507229	N	Y	Y	NA	N	NA	N	NA	N	NA	C
ENSG00000121774	KHDRBS1	Y	N	N	1	Y	NA	N	Y	Y	<0.2	D
ENSG00000121775	TMEM39B	Y	N	N	3	N	NA	N	NA	N	<0.2	NA
ENSG00000025800	KPNA6	Y	N	N	2	N	NA	Y	Y	Y	NA	D
ENSG00000084652	TXLNA	Y	N	N	1	N	NA	N	NA	Y	<0.2	D
ENSG00000160050	CCDC28B	N	N	N	2	Y	NA	N	NA	N	<0.2	C
ENSG00000160051	IQCC	N	N	N	1	N	NA	N	NA	N	NA	D
ENSG00000222046	DCDC2B	Y	N	N	1	N	NA	N	NA	N	<0.2	NA
ENSG00000160055	TMEM234	N	N	N	1	N	NA	N	N	N	NA	NA
ENSG00000084623	EIF3I	N	N	N	2	N	NA	N	NA	Y	>0.2	D
ENSG00000183615	FAM167B	N	N	N	2	N	NA	N	NA	N	<0.2	B
ENSG00000182866	LCK	Y	N	N	3	Y	NA	Y	N	Y	<0.2	NA
ENSG00000116478	HDAC1	Y	N	N	2	Y	NA	N	NA	Y	<0.2	D
ENSG00000175130	MARCKSL1	N	N	N	2	Y	NA	N	N	Y	NA	D
ENSG00000162526	TSSK3	N	N	N	2	Y	NA	N	NA	N	<0.2	C
ENSG00000225828	RP4-811H24.6	N	Y	N	NA	N	NA	N	NA	N	NA	NA
ENSG00000160058	BSDC1	N	N	N	2	N	NA	N	NA	N	<0.2	D
ENSG00000254553	RP1-27O5.3	Y	Y	N	NA	N	NA	N	NA	N	>0.2	NA
ENSG00000215897	ZBTB8B	Y	Y	N	1	N	NA	N	NA	Y	>0.2	NA
ENSG00000160062	ZBTB8A	N	N	N	1	N	NA	N	NA	N	<0.2	B
ENSG00000176261	ZBTB8OS	N	N	N	2	N	NA	N	NA	N	<0.2	NA
ENSG00000162521	RBBP4	Y	N	N	2	N	NA	N	NA	Y	<0.2	NA
ENSG00000162520	SYNC	N	N	N	2	Y	NA	N	N	Y	>0.2	NA
ENSG00000162522	KIAA1522	N	N	N	1	N	NA	N	NA	N	NA	NA
ENSG00000134684	YARS	N	N	N	1	Y	AD	N	NA	Y	<0.2	NA
ENSG00000116497	S100PBP	N	N	N	2	Y	NA	N	NA	N	NA	NA
ENSG00000160097	FNDC5	N	N	Y	2	N	NA	N	NA	N	>0.2	NA
ENSG00000121905	HPCA	Y	N	Y	1	N	NA	N	N	N	NA	C
ENSG00000121900	TMEM54	N	N	Y	1	Y	NA	N	NA	N	NA	B
ENSG00000116514	RNF19B	N	N	N	2	N	NA	N	N	N	<0.2	D
ENSG00000267885	FKSG48	N	Y	N	NA	N	NA	N	NA	N	NA	NA
ENSG00000004455	AK2	N	N	N	3	Y	AR	N	N	Y	<0.2	C
ENSG00000142920	ADC	Y	N	N	1	Y	NA	N	NA	N	>0.2	D
ENSG00000116525	TRIM62	N	N	N	1	Y	NA	N	NA	N	>0.2	D
ENSG00000160094	ZNF362	N	N	N	1	N	NA	N	NA	N	NA	C
ENSG00000134686	PHC2	Y	N	N	2	N	NA	N	Y	Y	>0.2	D
ENSG00000121903	ZSCAN20	N	Y	N	3	N	NA	N	NA	N	<0.2	C
ENSG00000121904	CSMD2	Y	N	N	3	N	NA	N	NA	N	<0.2	D
ENSG00000176256	HMGB4	N	N	N	3	N	NA	N	NA	N	<0.2	C
ENSG00000142698	C1orf94	N	N	Y	3	N	NA	N	NA	N	NA	C
ENSG00000163866	C1orf212	N	N	N	3	N	NA	N	NA	N	NA	NA
ENSG00000189280	GJB5	N	Y	N	2	Y	NA	N	NA	Y	NA	B
ENSG00000189433	GJB4	N	Y	N	3	Y	AD	N	NA	Y	NA	B
ENSG00000188910	GJB3	N	N	N	3	Y	AD	N	NA	Y	NA	NA
ENSG00000187513	GJA4	N	N	N	2	Y	NA	N	Y	Y	NA	B
ENSG00000116544	DLGAP3	N	N	N	2	Y	NA	N	N	N	>0.2	NA
ENSG00000163867	ZMYM6	Y	Y	N	2	N	NA	N	NA	N	<0.2	D
ENSG00000243749	ZMYM6NB	N	N	N	NA	N	NA	N	NA	N	>0.2	C
ENSG00000197056	ZMYM1	Y	Y	N	2	N	NA	N	NA	N	>0.2	C
ENSG00000116560	SFPQ	Y	N	N	2	Y	NA	N	N	Y	<0.2	D
ENSG00000146463	ZMYM4	Y	Y	N	2	N	NA	N	NA	N	<0.2	NA
ENSG00000142687	KIAA0319L	N	N	N	3	N	NA	N	NA	N	<0.2	D
ENSG00000020129	NCDN	N	N	N	2	N	NA	N	N	N	<0.2	B
ENSG00000116819	TFAP2E	Y	N	N	1	N	NA	N	NA	N	<0.2	B
ENSG00000126067	PSMB2	N	N	N	1	N	NA	N	NA	Y	<0.2	NA
ENSG00000142686	C1orf216	N	N	N	1	N	NA	N	NA	N	NA	C
ENSG00000092853	CLSPN	N	N	N	3	Y	NA	N	NA	Y	<0.2	D
ENSG00000134698	EIF2C4	Y	N	N	2	N	NA	N	N	Y	<0.2	C
ENSG00000092847	EIF2C1	Y	N	N	2	N	NA	N	N	N	<0.2	NA
ENSG00000126070	EIF2C3	Y	N	N	2	N	NA	N	NA	N	<0.2	B
ENSG00000092850	TEKT2	N	N	N	2	Y	NA	N	Y	Y	<0.2	C
ENSG00000116863	ADPRHL2	N	N	N	1	N	NA	N	NA	Y	<0.2	C
ENSG00000171812	COL8A2	Y	N	N	1	Y	AD	N	N	N	>0.2	D
ENSG00000054116	TRAPPC3	Y	N	N	2	N	NA	N	NA	Y	<0.2	D
ENSG00000116871	MAP7D1	N	N	N	1	N	NA	N	NA	N	>0.2	NA
ENSG00000054118	THRAP3	N	N	N	2	N	NA	N	NA	Y	NA	NA
ENSG00000214193	SH3D21	Y	N	N	2	N	NA	Y	NA	N	>0.2	C
ENSG00000142694	EVA1B	N	N	N	1	N	NA	N	NA	N	NA	NA
ENSG00000116883	AL591845.1	N	N	N	NA	N	NA	N	NA	N	NA	NA
ENSG00000196182	STK40	N	N	N	3	N	NA	N	NA	N	<0.2	D
ENSG00000181817	LSM10	N	N	N	1	N	NA	N	NA	Y	<0.2	D
ENSG00000116885	OSCP1	N	N	N	3	N	NA	N	NA	N	<0.2	D
ENSG00000116898	MRPS15	N	N	N	2	N	NA	N	NA	Y	>0.2	NA
ENSG00000119535	CSF3R	Y	N	N	2	Y	AD	N	N	N	>0.2	NA
ENSG00000163873	GRIK3	Y	N	N	3	Y	NA	N	N	N	<0.2	B
ENSG00000163874	ZC3H12A	Y	N	N	2	N	NA	N	Y	N	<0.2	C
ENSG00000163875	MEAF6	N	N	Y	2	N	NA	N	NA	Y	<0.2	D
ENSG00000163877	SNIP1	N	N	Y	3	Y	NA	N	NA	Y	<0.2	B
ENSG00000163879	DNALI1	N	N	Y	1	N	NA	N	NA	N	<0.2	B
ENSG00000134697	GNL2	N	N	N	2	N	NA	N	NA	N	<0.2	D
ENSG00000169218	RSPO1	N	N	N	2	Y	NA	N	N	N	<0.2	C
ENSG00000116922	C1orf109	N	N	N	1	N	NA	N	NA	N	<0.2	D
ENSG00000134690	CDCA8	N	N	N	1	N	NA	N	NA	Y	>0.2	NA
ENSG00000183317	EPHA10	Y	N	N	3	N	NA	Y	NA	N	<0.2	B
ENSG00000185090	MANEAL	N	N	N	1	N	NA	N	NA	N	<0.2	NA
ENSG00000196449	YRDC	N	N	N	1	N	NA	N	NA	Y	<0.2	NA
ENSG00000197982	C1orf122	N	N	N	1	N	NA	N	NA	N	NA	D
ENSG00000188786	MTF1	N	N	N	2	Y	NA	N	Y	N	<0.2	NA
ENSG00000230610	AL929472.1	N	N	N	NA	N	NA	N	NA	N	NA	NA
ENSG00000204084	INPP5B	N	N	N	2	N	NA	N	Y	N	<0.2	B
ENSG00000183431	SF3A3	N	N	N	2	N	NA	N	NA	Y	NA	NA
ENSG00000183386	FHL3	Y	N	N	1	N	NA	N	NA	Y	<0.2	C
ENSG00000183520	UTP11L	N	N	N	1	N	NA	N	NA	N	>0.2	NA
ENSG00000185668	POU3F1	Y	N	N	1	N	NA	N	N	Y	<0.2	C
ENSG00000116954	RRAGC	Y	N	Y	1	N	NA	N	NA	N	<0.2	NA
ENSG00000214114	MYCBP	N	N	N	3	N	NA	N	NA	Y	<0.2	NA
ENSG00000131233	GJA9	N	N	N	2	N	NA	N	NA	Y	NA	NA
ENSG00000158315	RHBDL2	N	N	N	1	N	NA	N	NA	N	>0.2	NA
ENSG00000174574	AKIRIN1	Y	N	N	2	N	NA	N	N	N	<0.2	NA
ENSG00000168653	NDUFS5	N	N	N	3	Y	NA	N	NA	Y	<0.2	D
ENSG00000127603	MACF1	Y	N	N	3	N	NA	Y	Y	Y	<0.2	C
ENSG00000255103	KIAA0754	N	N	N	1	N	NA	N	NA	N	>0.2	C
ENSG00000183682	BMP8A	Y	Y	N	1	N	NA	N	NA	N	<0.2	B
ENSG00000090621	PABPC4	Y	N	N	2	N	NA	N	NA	Y	<0.2	NA
ENSG00000163909	HEYL	Y	N	N	1	Y	NA	N	Y	N	<0.2	NA
ENSG00000116981	NT5C1A	N	N	N	2	N	NA	N	NA	N	<0.2	C
ENSG00000116983	HPCAL4	Y	N	N	3	N	NA	N	NA	N	NA	D
ENSG00000084072	PPIE	N	N	N	1	N	NA	N	NA	Y	<0.2	D
ENSG00000116985	BMP8B	Y	Y	Y	1	N	NA	N	NA	N	<0.2	B
ENSG00000198754	OXCT2	N	Y	Y	1	N	NA	N	NA	N	<0.2	NA
ENSG00000043514	TRIT1	N	N	N	2	Y	NA	N	NA	N	<0.2	D
ENSG00000116990	MYCL1	N	N	N	2	Y	NA	N	N	N	>0.2	C
ENSG00000168389	MFSD2A	N	N	N	2	Y	NA	N	Y	N	<0.2	C
ENSG00000131236	CAP1	Y	N	Y	1	N	NA	N	NA	Y	<0.2	NA
ENSG00000131238	PPT1	N	N	N	2	Y	AR	N	Y	Y	<0.2	D
ENSG00000117000	RLF	N	N	Y	2	Y	NA	N	NA	Y	>0.2	C
ENSG00000188800	TMCO2	N	N	Y	2	N	NA	N	NA	N	NA	B
ENSG00000084073	ZMPSTE24	N	N	N	2	Y	AR	N	Y	Y	<0.2	D
ENSG00000049089	COL9A2	N	N	N	2	Y	AD	N	NA	N	>0.2	B
ENSG00000084070	SMAP2	N	N	N	3	N	NA	N	NA	N	<0.2	D
ENSG00000187801	ZNF643	N	Y	N	2	N	NA	N	NA	N	NA	C
ENSG00000187815	ZNF642	N	Y	N	1	N	NA	N	NA	N	NA	D
ENSG00000164002	EXO5	N	N	N	2	N	NA	N	NA	N	<0.2	NA
ENSG00000117010	ZNF684	N	Y	N	2	N	NA	N	NA	N	<0.2	C
ENSG00000117016	RIMS3	N	N	N	3	Y	NA	N	NA	N	<0.2	B
ENSG00000066136	NFYC	N	N	N	2	Y	NA	N	NA	Y	<0.2	NA
ENSG00000117013	KCNQ4	Y	N	N	2	Y	AD	N	N	N	<0.2	B
ENSG00000179862	CITED4	Y	N	N	NA	N	NA	N	N	Y	>0.2	C
ENSG00000171793	CTPS1	Y	N	N	3	Y	NA	N	NA	Y	<0.2	B
ENSG00000171790	SLFNL1	N	N	N	1	N	NA	N	NA	N	>0.2	D
ENSG00000010803	SCMH1	Y	N	N	3	N	NA	N	Y	Y	<0.2	NA
ENSG00000204060	FOXO6	Y	N	N	NA	N	NA	N	N	N	<0.2	NA
ENSG00000127129	EDN2	N	N	N	1	Y	NA	N	NA	N	NA	C
ENSG00000127124	HIVEP3	Y	N	N	2	N	NA	N	NA	N	>0.2	NA
ENSG00000044012	GUCA2B	N	Y	N	1	N	NA	N	N	N	NA	B
ENSG00000197273	GUCA2A	N	Y	N	2	Y	NA	N	N	N	NA	D
ENSG00000198815	FOXJ3	Y	N	N	1	N	NA	N	N	Y	NA	NA
ENSG00000177181	RIMKLA	N	N	N	2	N	NA	N	NA	N	>0.2	B
ENSG00000066185	ZMYND12	N	N	N	2	N	NA	N	NA	N	<0.2	C
ENSG00000127125	PPCS	N	N	N	2	N	NA	N	NA	N	<0.2	D
ENSG00000186409	CCDC30	N	N	N	2	N	NA	N	NA	N	>0.2	B
ENSG00000171960	PPIH	N	N	N	1	N	NA	N	NA	Y	<0.2	D
ENSG00000065978	YBX1	Y	N	N	2	Y	NA	N	Y	Y	<0.2	NA
ENSG00000164007	CLDN19	N	N	N	2	Y	AR	N	N	N	>0.2	B
ENSG00000117385	LEPRE1	Y	N	N	1	Y	AR	N	NA	N	<0.2	NA
ENSG00000164008	C1orf50	N	N	N	2	N	NA	N	NA	N	NA	C
ENSG00000177868	CCDC23	N	N	N	1	N	NA	N	NA	N	NA	NA
ENSG00000164010	ERMAP	N	Y	N	1	Y	NA	N	NA	Y	>0.2	C
ENSG00000164011	ZNF691	N	Y	N	1	N	NA	N	NA	N	<0.2	NA
ENSG00000117394	SLC2A1	N	N	N	1	Y	AD	N	Y	Y	<0.2	B
ENSG00000186973	FAM183A	N	Y	N	3	N	NA	N	NA	N	NA	C
ENSG00000117395	EBNA1BP2	N	N	N	2	Y	NA	N	NA	Y	<0.2	D
ENSG00000243710	WDR65	N	N	N	1	Y	NA	N	NA	N	>0.2	NA
ENSG00000179178	TMEM125	N	N	N	1	N	NA	N	NA	N	NA	C
ENSG00000253313	C1orf210	N	N	N	1	N	NA	N	NA	N	NA	D
ENSG00000066056	TIE1	Y	N	N	3	Y	NA	Y	Y	N	<0.2	NA
ENSG00000117400	MPL	N	N	N	3	Y	AR	N	Y	N	NA	C
ENSG00000117399	CDC20	Y	N	N	2	Y	NA	N	Y	Y	<0.2	NA
ENSG00000066322	ELOVL1	Y	N	N	2	N	NA	N	NA	N	<0.2	D
ENSG00000159479	MED8	N	N	N	3	Y	NA	N	NA	Y	<0.2	B
ENSG00000198198	SZT2	N	N	N	3	N	NA	N	NA	N	<0.2	D
ENSG00000178922	HYI	N	N	N	2	N	NA	N	NA	N	<0.2	NA
ENSG00000142949	PTPRF	Y	N	N	2	Y	NA	N	Y	Y	<0.2	C
ENSG00000066135	KDM4A	Y	N	N	2	N	NA	N	NA	Y	<0.2	D
ENSG00000126091	ST3GAL3	N	N	N	2	Y	NA	N	N	N	<0.2	C
ENSG00000117407	ARTN	N	N	N	1	Y	NA	N	NA	N	NA	D
ENSG00000117408	IPO13	N	N	N	2	N	NA	N	NA	Y	<0.2	D
ENSG00000132768	DPH2	N	N	N	2	N	NA	N	N	N	>0.2	D
ENSG00000117410	ATP6V0B	N	N	N	1	N	NA	N	NA	Y	<0.2	NA
ENSG00000117411	B4GALT2	N	N	N	2	N	NA	N	N	N	<0.2	C
ENSG00000159214	CCDC24	N	N	N	2	N	NA	N	NA	N	>0.2	B
ENSG00000196517	SLC6A9	N	N	N	3	N	NA	N	Y	N	<0.2	NA
ENSG00000171872	KLF17	Y	N	Y	3	N	NA	N	NA	N	>0.2	NA
ENSG00000178028	DMAP1	N	N	N	2	N	NA	N	N	Y	<0.2	B
ENSG00000117419	ERI3	N	N	N	3	N	NA	N	NA	Y	<0.2	B
ENSG00000187147	RNF220	N	N	N	3	N	NA	N	NA	N	<0.2	NA
ENSG00000126106	TMEM53	N	N	N	3	N	NA	N	NA	N	<0.2	C
ENSG00000198520	C1orf228	N	N	N	1	N	NA	N	NA	N	<0.2	C
ENSG00000142945	KIF2C	N	N	N	2	Y	NA	N	NA	Y	<0.2	B
ENSG00000142937	RPS8	N	N	N	3	N	NA	N	NA	Y	NA	B
ENSG00000142959	BEST4	N	N	N	1	N	NA	N	NA	N	<0.2	C
ENSG00000173846	PLK3	Y	N	N	1	Y	NA	N	N	N	<0.2	D
ENSG00000188396	TCTEX1D4	N	N	N	1	N	NA	N	NA	N	>0.2	NA
ENSG00000222009	BTBD19	N	N	N	1	N	NA	N	NA	N	<0.2	C
ENSG00000117425	PTCH2	Y	N	N	2	Y	AD	N	N	N	<0.2	B
ENSG00000070785	EIF2B3	N	N	N	2	Y	AR	N	NA	Y	NA	D
ENSG00000126107	HECTD3	N	N	N	3	N	NA	N	NA	N	<0.2	D
ENSG00000126088	UROD	N	N	N	1	Y	AD	N	Y	Y	<0.2	D
ENSG00000162415	ZSWIM5	Y	N	N	1	N	NA	N	NA	N	<0.2	D
ENSG00000186603	HPDL	N	N	N	1	N	NA	N	NA	Y	<0.2	C
ENSG00000132781	MUTYH	N	N	N	2	Y	AR	N	Y	N	<0.2	NA
ENSG00000132773	TOE1	N	N	Y	1	N	NA	N	NA	Y	<0.2	D
ENSG00000070759	TESK2	Y	N	N	3	N	NA	N	NA	N	<0.2	C
ENSG00000236624	CCDC163P	N	N	N	1	N	NA	N	NA	N	NA	C
ENSG00000132763	MMACHC	N	N	N	1	Y	AR	N	NA	N	<0.2	NA
ENSG00000117450	PRDX1	Y	N	N	3	Y	NA	N	Y	Y	<0.2	D
ENSG00000117448	AKR1A1	N	N	N	1	Y	NA	N	Y	N	<0.2	NA
ENSG00000132780	NASP	N	N	N	1	N	NA	N	Y	Y	<0.2	C
ENSG00000159588	CCDC17	N	N	N	1	N	NA	N	NA	N	<0.2	C
ENSG00000159592	GPBP1L1	N	N	N	2	N	NA	N	NA	N	NA	NA
ENSG00000159596	TMEM69	N	N	N	1	N	NA	N	NA	N	<0.2	C
ENSG00000197429	IPP	N	N	N	2	N	NA	N	NA	N	<0.2	C
ENSG00000086015	MAST2	Y	N	N	2	N	NA	N	N	N	<0.2	D
ENSG00000117461	PIK3R3	Y	N	N	2	Y	NA	Y	NA	Y	NA	C
ENSG00000117472	TSPAN1	N	N	N	1	N	NA	N	NA	N	>0.2	B
ENSG00000085998	POMGNT1	N	N	N	3	Y	AR	N	Y	N	<0.2	D
ENSG00000171357	LURAP1	N	N	N	1	N	NA	N	NA	N	>0.2	B
ENSG00000085999	RAD54L	N	N	N	2	Y	AD	N	N	N	<0.2	C
ENSG00000132128	LRRC41	N	N	N	2	N	NA	N	NA	Y	NA	D
ENSG00000173660	UQCRH	N	N	N	1	N	NA	N	NA	Y	NA	NA
ENSG00000117481	NSUN4	N	N	N	1	N	NA	N	NA	N	<0.2	B
ENSG00000117480	FAAH	N	N	N	2	Y	NA	N	Y	N	<0.2	NA
ENSG00000197587	DMBX1	N	N	N	2	N	NA	N	Y	Y	<0.2	C
ENSG00000162456	KNCN	N	N	N	1	N	NA	N	NA	Y	NA	D
ENSG00000079277	MKNK1	Y	N	N	2	Y	NA	Y	N	Y	<0.2	NA
ENSG00000142961	MOB3C	Y	N	N	2	N	NA	N	NA	N	NA	B
ENSG00000123472	ATPAF1	N	N	N	1	N	NA	N	NA	N	>0.2	C
ENSG00000159658	KIAA0494	N	N	N	1	N	NA	N	NA	N	>0.2	NA
ENSG00000186118	TEX38	N	N	N	1	N	NA	N	NA	N	NA	C
ENSG00000142973	CYP4B1	N	Y	N	3	Y	NA	N	NA	N	<0.2	C
ENSG00000187048	CYP4A11	N	Y	N	3	Y	NA	N	NA	N	<0.2	NA
ENSG00000186377	CYP4X1	N	Y	N	2	N	NA	N	N	N	<0.2	C
ENSG00000186160	CYP4Z1	N	Y	N	1	N	NA	N	NA	N	>0.2	NA
ENSG00000162365	CYP4A22	N	Y	N	2	Y	NA	N	NA	N	<0.2	NA
ENSG00000162366	PDZK1IP1	N	N	N	1	Y	NA	N	NA	N	>0.2	B
ENSG00000162367	TAL1	Y	N	N	2	Y	NA	N	Y	Y	NA	B
ENSG00000123473	STIL	N	N	N	2	Y	NA	N	Y	N	<0.2	D
ENSG00000162368	CMPK1	N	N	N	2	Y	NA	N	N	N	<0.2	NA
ENSG00000186790	FOXE3	Y	N	N	1	Y	AD	N	N	Y	<0.2	B
ENSG00000186564	FOXD2	Y	Y	N	1	N	NA	N	NA	Y	<0.2	B
ENSG00000269113	FLJ00388	N	N	N	NA	N	NA	N	NA	N	NA	NA
ENSG00000204018	TRABD2B	N	N	N	NA	N	NA	N	NA	N	NA	C
ENSG00000269709	AL109659.1	N	N	N	NA	N	NA	N	NA	N	NA	NA
ENSG00000117834	SLC5A9	N	N	N	2	N	NA	N	NA	N	<0.2	B
ENSG00000132122	SPATA6	Y	N	N	2	N	NA	N	NA	N	<0.2	B
ENSG00000186094	AGBL4	N	N	N	2	Y	NA	N	NA	N	<0.2	NA
ENSG00000162373	BEND5	N	N	N	2	N	NA	N	NA	N	NA	D
ENSG00000227839	AL645730.2	N	N	N	NA	N	NA	N	NA	N	NA	C
ENSG00000162374	ELAVL4	Y	N	N	3	Y	NA	N	Y	Y	<0.2	B
ENSG00000142700	DMRTA2	Y	N	N	1	N	NA	N	NA	N	>0.2	NA
ENSG00000185104	FAF1	N	N	N	2	N	NA	N	Y	Y	<0.2	NA
ENSG00000123080	CDKN2C	N	N	N	3	Y	NA	N	Y	N	<0.2	C
ENSG00000204006	C1orf185	N	N	N	1	N	NA	N	NA	N	NA	NA
ENSG00000123091	RNF11	N	N	N	1	Y	NA	N	NA	Y	<0.2	D
ENSG00000085831	TTC39A	Y	N	N	3	N	NA	N	NA	N	<0.2	C
ENSG00000085832	EPS15	Y	N	N	2	Y	NA	N	N	Y	<0.2	D
ENSG00000117859	OSBPL9	N	N	N	3	N	NA	Y	NA	N	<0.2	D
ENSG00000078618	NRD1	N	N	N	1	N	NA	N	NA	Y	<0.2	NA
ENSG00000169213	RAB3B	Y	N	Y	3	N	NA	N	Y	N	<0.2	B
ENSG00000117862	TXNDC12	N	N	Y	2	N	NA	N	N	Y	<0.2	NA
ENSG00000198841	KTI12	N	N	Y	2	N	NA	N	NA	N	<0.2	NA
ENSG00000134717	BTF3L4	Y	N	N	1	N	NA	N	NA	Y	<0.2	NA
ENSG00000157077	ZFYVE9	Y	N	N	2	Y	NA	N	NA	Y	<0.2	NA
ENSG00000154222	CC2D1B	Y	N	N	2	N	NA	N	NA	N	>0.2	C
ENSG00000085840	ORC1	N	N	N	3	Y	NA	N	NA	Y	<0.2	B
ENSG00000134748	PRPF38A	N	N	N	2	N	NA	N	NA	N	<0.2	D
ENSG00000134744	ZCCHC11	Y	N	N	2	N	NA	N	Y	N	<0.2	D
ENSG00000116157	GPX7	N	N	N	2	N	NA	N	Y	N	<0.2	B
ENSG00000182183	FAM159A	N	N	N	3	N	NA	N	NA	N	>0.2	C
ENSG00000162377	SELRC1	N	N	N	1	N	NA	N	NA	Y	<0.2	NA
ENSG00000162378	ZYG11B	N	Y	Y	2	N	NA	N	NA	N	<0.2	D
ENSG00000203995	ZYG11A	N	Y	Y	1	N	NA	N	NA	N	<0.2	C
ENSG00000121310	ECHDC2	Y	N	Y	2	N	NA	N	NA	N	<0.2	D
ENSG00000116171	SCP2	N	N	N	2	Y	NA	N	N	Y	<0.2	D
ENSG00000174348	PODN	Y	N	Y	3	N	NA	N	N	N	<0.2	C
ENSG00000162383	SLC1A7	Y	N	N	2	N	NA	N	NA	N	<0.2	C
ENSG00000157184	CPT2	N	N	Y	1	Y	AR	N	NA	N	<0.2	C
ENSG00000162384	C1orf123	N	N	Y	2	N	NA	N	NA	N	<0.2	NA
ENSG00000162385	MAGOH	N	Y	Y	1	N	NA	N	Y	Y	NA	D
ENSG00000157193	LRP8	Y	N	N	1	Y	NA	N	Y	N	<0.2	D
ENSG00000143006	DMRTB1	Y	N	N	2	N	NA	N	NA	N	>0.2	D
ENSG00000174332	GLIS1	Y	N	N	2	Y	NA	N	NA	N	NA	C
ENSG00000058804	TMEM48	N	N	N	1	N	NA	N	NA	N	<0.2	NA
ENSG00000058799	YIPF1	Y	N	N	3	N	NA	N	NA	N	<0.2	NA
ENSG00000211452	DIO1	N	N	N	3	Y	AD	N	N	N	>0.2	NA
ENSG00000081870	HSPB11	N	N	N	3	N	NA	N	NA	Y	<0.2	B
ENSG00000116212	LRRC42	N	N	N	1	N	NA	N	NA	Y	<0.2	NA
ENSG00000203985	LDLRAD1	N	N	N	3	N	NA	N	NA	N	<0.2	C
ENSG00000116209	TMEM59	Y	N	N	1	N	NA	N	N	N	<0.2	D
ENSG00000116205	TCEANC2	N	N	N	1	N	NA	N	NA	N	<0.2	D
ENSG00000212670	AL161915.1	N	Y	N	1	N	NA	N	NA	N	NA	NA
ENSG00000157211	CDCP2	N	N	N	3	N	NA	N	NA	N	<0.2	NA
ENSG00000256407	CYB5RL	N	Y	N	NA	N	NA	N	NA	N	NA	NA
ENSG00000248835	AL357673.1	N	N	N	NA	N	NA	N	NA	N	NA	D
ENSG00000215883	CYB5RL	N	Y	N	1	N	NA	N	NA	N	<0.2	D
ENSG00000116221	MRPL37	N	N	N	2	N	NA	N	NA	Y	<0.2	D
ENSG00000157216	SSBP3	Y	N	N	3	N	NA	N	Y	Y	<0.2	NA
ENSG00000198711	C1orf191	N	N	N	NA	N	NA	N	NA	N	NA	NA
ENSG00000162390	ACOT11	Y	N	N	3	N	NA	N	N	N	>0.2	D
ENSG00000162391	FAM151A	Y	N	N	1	N	NA	N	N	N	<0.2	NA
ENSG00000184313	HEATR8	N	Y	N	3	N	NA	N	NA	N	>0.2	C
ENSG00000243725	TTC4	N	N	N	1	N	NA	N	NA	Y	<0.2	C
ENSG00000162396	PARS2	N	N	N	2	N	NA	N	NA	N	<0.2	D
ENSG00000006555	TTC22	N	N	N	1	N	NA	N	NA	N	<0.2	B
ENSG00000162398	C1orf177	N	N	Y	2	N	NA	N	NA	N	<0.2	B
ENSG00000116133	DHCR24	N	N	N	1	Y	AR	N	NA	N	<0.2	D
ENSG00000143001	TMEM61	N	N	N	2	N	NA	N	NA	N	NA	B
ENSG00000162399	BSND	N	N	N	2	Y	AR	N	Y	Y	NA	NA
ENSG00000169174	PCSK9	N	N	N	2	Y	NA	Y	N	N	<0.2	C
ENSG00000162402	USP24	N	N	N	2	Y	NA	N	NA	N	<0.2	D
ENSG00000162407	PPAP2B	Y	N	N	3	N	NA	N	Y	Y	<0.2	D
ENSG00000162409	PRKAA2	N	N	N	3	Y	NA	Y	N	Y	<0.2	C
ENSG00000187889	C1orf168	N	N	N	3	N	NA	N	NA	N	NA	C
ENSG00000157131	C8A	N	N	N	3	Y	AD	N	NA	Y	<0.2	NA
ENSG00000021852	C8B	N	N	N	3	Y	AD	N	NA	Y	<0.2	C
ENSG00000173406	DAB1	Y	N	N	3	Y	NA	N	Y	N	<0.2	B
ENSG00000162600	OMA1	N	N	N	2	N	NA	N	N	N	<0.2	C
ENSG00000184292	TACSTD2	N	Y	N	NA	Y	AR	N	N	N	NA	NA
ENSG00000162601	MYSM1	N	N	N	1	N	NA	N	NA	Y	<0.2	D
ENSG00000177606	JUN	Y	N	N	2	Y	NA	N	Y	Y	<0.2	D
ENSG00000172456	FGGY	N	N	N	3	Y	AD	N	N	N	<0.2	B
ENSG00000134709	HOOK1	Y	N	N	2	N	NA	N	NA	Y	<0.2	C
ENSG00000134716	CYP2J2	Y	N	N	3	Y	NA	N	NA	N	<0.2	B
ENSG00000162598	C1orf87	N	N	N	3	N	NA	N	NA	N	>0.2	D
ENSG00000162599	NFIA	Y	N	N	3	Y	NA	N	Y	Y	NA	D
ENSG00000162604	TM2D1	N	N	N	3	Y	NA	N	NA	N	<0.2	C
ENSG00000132849	INADL	Y	N	N	3	N	NA	N	NA	Y	<0.2	D
ENSG00000240563	L1TD1	N	N	N	2	N	NA	N	NA	N	NA	C
ENSG00000132854	KANK4	Y	N	N	3	N	NA	N	NA	N	<0.2	B
ENSG00000162607	USP1	N	N	N	2	N	NA	N	Y	Y	<0.2	NA
ENSG00000116641	DOCK7	Y	N	N	2	N	NA	N	NA	Y	<0.2	D
ENSG00000132855	ANGPTL3	Y	N	N	2	Y	NA	N	Y	N	<0.2	C
ENSG00000269624	AL138847.1	N	N	N	NA	N	NA	N	NA	N	NA	NA
ENSG00000125703	ATG4C	Y	N	N	3	N	NA	Y	N	N	<0.2	D
ENSG00000187140	FOXD3	Y	N	N	1	Y	NA	N	Y	Y	<0.2	NA
ENSG00000088035	ALG6	N	N	N	1	Y	AR	N	NA	N	<0.2	C
ENSG00000142856	ITGB3BP	N	N	N	2	N	NA	N	NA	Y	NA	NA
ENSG00000203965	EFCAB7	N	N	N	2	N	NA	N	NA	N	<0.2	NA
ENSG00000116652	DLEU2L	N	N	N	NA	N	NA	N	NA	N	NA	NA
ENSG00000079739	PGM1	N	N	N	3	Y	AR	N	NA	Y	<0.2	NA
ENSG00000185483	ROR1	Y	N	N	3	N	NA	N	Y	N	NA	B
ENSG00000177414	UBE2U	N	N	N	1	N	NA	N	NA	N	<0.2	NA
ENSG00000158966	CACHD1	N	N	N	2	Y	NA	N	NA	N	<0.2	C
ENSG00000162437	RAVER2	Y	N	N	2	N	NA	N	NA	N	<0.2	B
ENSG00000162434	JAK1	N	N	N	3	Y	NA	Y	Y	Y	<0.2	D
ENSG00000162433	AK4	Y	N	N	2	N	NA	N	NA	N	<0.2	D
ENSG00000116675	DNAJC6	Y	N	N	3	Y	NA	N	Y	N	<0.2	NA
ENSG00000116678	LEPR	Y	N	N	3	Y	NA	Y	Y	Y	>0.2	C
ENSG00000213625	LEPROT	N	N	N	3	Y	NA	N	NA	N	<0.2	D
ENSG00000184588	PDE4B	Y	N	N	3	Y	NA	N	Y	Y	<0.2	D
ENSG00000118473	SGIP1	Y	N	N	3	N	NA	N	NA	N	<0.2	D
ENSG00000248458	AL139147.1	N	Y	N	NA	N	NA	N	NA	N	NA	NA
ENSG00000152760	TCTEX1D1	N	N	N	3	N	NA	N	NA	N	<0.2	NA
ENSG00000172410	INSL5	N	N	N	3	N	NA	N	Y	N	NA	B
ENSG00000152763	WDR78	N	N	N	2	N	NA	N	NA	N	<0.2	NA
ENSG00000198160	MIER1	Y	N	N	3	N	NA	N	NA	Y	>0.2	C
ENSG00000116704	SLC35D1	Y	N	N	1	Y	AR	N	Y	N	<0.2	C
ENSG00000203963	C1orf141	N	N	N	3	N	NA	N	NA	N	NA	NA
ENSG00000162594	IL23R	N	N	N	2	Y	NA	N	N	N	NA	NA
ENSG00000081985	IL12RB2	Y	N	N	2	Y	NA	N	N	Y	>0.2	B
ENSG00000142864	SERBP1	Y	N	N	1	N	NA	N	NA	Y	<0.2	D
ENSG00000116717	GADD45A	N	N	N	3	Y	NA	N	Y	Y	>0.2	D
ENSG00000172380	GNG12	N	N	N	2	N	NA	N	NA	Y	NA	D
ENSG00000162595	DIRAS3	Y	N	N	3	Y	NA	N	NA	N	<0.2	C
ENSG00000116729	WLS	N	N	N	3	N	NA	N	Y	N	<0.2	NA
ENSG00000116745	RPE65	N	N	N	3	Y	AR	N	N	N	<0.2	C
ENSG00000024526	DEPDC1	N	N	N	2	N	NA	N	NA	Y	<0.2	NA
ENSG00000033122	LRRC7	Y	N	N	3	N	NA	N	Y	Y	<0.2	D
ENSG00000066557	LRRC40	N	N	N	2	N	NA	N	NA	Y	<0.2	D
ENSG00000116754	SRSF11	Y	N	N	3	N	NA	N	NA	Y	<0.2	D
ENSG00000118454	ANKRD13C	N	N	N	1	N	NA	N	NA	N	<0.2	D
ENSG00000197568	HHLA3	N	N	N	2	N	NA	N	NA	N	NA	NA
ENSG00000116761	CTH	N	N	N	3	Y	AR	N	N	N	<0.2	C
ENSG00000050628	PTGER3	Y	N	N	3	N	NA	N	N	N	>0.2	C
ENSG00000132485	ZRANB2	N	N	N	3	N	NA	N	NA	Y	<0.2	NA
ENSG00000172260	NEGR1	N	N	N	3	Y	NA	N	N	N	>0.2	C
ENSG00000162620	LRRIQ3	N	N	N	3	N	NA	N	NA	N	<0.2	D
ENSG00000254685	FPGT	N	N	N	3	N	NA	N	NA	Y	<0.2	C
ENSG00000259030	FPGT-TNNI3K	N	Y	N	NA	N	NA	N	NA	N	NA	B
ENSG00000116783	TNNI3K	N	Y	N	3	Y	NA	N	NA	N	<0.2	B
ENSG00000162621	LRRC53	N	N	N	1	N	NA	N	NA	N	>0.2	NA
ENSG00000178965	C1orf173	N	N	N	3	N	NA	N	NA	N	<0.2	D
ENSG00000116791	CRYZ	N	N	N	2	N	NA	N	NA	N	<0.2	D
ENSG00000162623	TYW3	N	N	N	3	N	NA	N	NA	N	<0.2	C
ENSG00000162624	LHX8	Y	N	N	3	Y	NA	N	Y	N	<0.2	C
ENSG00000137968	SLC44A5	Y	N	N	3	N	NA	N	NA	N	<0.2	C
ENSG00000117054	ACADM	N	N	N	2	Y	AR	N	Y	N	<0.2	D
ENSG00000137955	RABGGTB	N	N	N	3	N	NA	N	N	Y	<0.2	D
ENSG00000057468	MSH4	N	N	N	3	Y	NA	N	Y	Y	<0.2	C
ENSG00000154007	ASB17	N	N	N	3	N	NA	N	NA	N	NA	C
ENSG00000184005	ST6GALNAC3	Y	N	N	3	N	NA	N	NA	N	<0.2	B
ENSG00000117069	ST6GALNAC5	Y	N	N	3	Y	NA	N	NA	N	<0.2	NA
ENSG00000142892	PIGK	N	N	N	3	N	NA	N	NA	Y	<0.2	B
ENSG00000154027	AK5	Y	N	N	3	N	NA	N	NA	N	<0.2	D
ENSG00000036549	ZZZ3	N	N	N	3	N	NA	N	NA	N	<0.2	C
ENSG00000077254	USP33	Y	N	N	3	N	NA	N	NA	Y	NA	B
ENSG00000180488	FAM73A	Y	N	N	2	N	NA	N	NA	N	<0.2	C
ENSG00000162614	NEXN	N	N	N	3	Y	NA	N	NA	N	>0.2	NA
ENSG00000162613	FUBP1	Y	N	N	3	N	NA	N	NA	Y	<0.2	D
ENSG00000162616	DNAJB4	Y	N	N	2	Y	NA	N	NA	Y	<0.2	D
ENSG00000137960	GIPC2	Y	N	N	3	Y	NA	N	NA	N	<0.2	C
ENSG00000122420	PTGFR	Y	N	N	3	N	NA	N	NA	N	>0.2	C
ENSG00000137959	IFI44L	N	Y	Y	3	Y	NA	N	NA	N	<0.2	B
ENSG00000137965	IFI44	N	Y	Y	2	N	NA	N	NA	N	<0.2	C
ENSG00000162618	ELTD1	Y	N	N	3	N	NA	N	N	N	>0.2	D
ENSG00000117114	LPHN2	Y	N	N	3	Y	NA	N	NA	N	<0.2	NA
ENSG00000137941	TTLL7	N	N	N	2	N	NA	N	NA	N	<0.2	C
ENSG00000142875	PRKACB	Y	N	N	3	Y	NA	N	Y	Y	<0.2	D
ENSG00000203943	SAMD13	Y	N	N	1	N	NA	N	NA	N	<0.2	B
ENSG00000137976	DNASE2B	N	N	N	3	N	NA	N	N	N	<0.2	B
ENSG00000117133	RPF1	N	N	N	2	N	NA	N	NA	N	<0.2	D
ENSG00000174021	GNG5	N	Y	N	3	N	NA	N	NA	Y	<0.2	NA
ENSG00000117151	CTBS	N	N	N	1	N	NA	N	N	N	<0.2	D
ENSG00000180869	C1orf180	N	N	N	NA	N	NA	N	NA	N	NA	NA
ENSG00000117155	SSX2IP	N	N	N	2	N	NA	N	NA	Y	<0.2	NA
ENSG00000171517	LPAR3	N	N	N	3	Y	NA	N	N	N	<0.2	B
ENSG00000153898	MCOLN2	Y	N	N	2	N	NA	N	NA	N	<0.2	C
ENSG00000162643	WDR63	N	N	N	2	N	NA	N	NA	N	<0.2	D
ENSG00000055732	MCOLN3	Y	N	N	3	N	NA	N	N	N	<0.2	B
ENSG00000097096	SYDE2	Y	N	Y	2	N	NA	N	NA	N	<0.2	C
ENSG00000162642	C1orf52	N	N	Y	2	N	NA	N	NA	N	>0.2	D
ENSG00000142867	BCL10	N	N	Y	3	Y	NA	N	Y	Y	NA	D
ENSG00000153904	DDAH1	N	N	N	1	Y	NA	N	Y	N	<0.2	D
ENSG00000142871	CYR61	N	N	N	1	Y	NA	N	NA	Y	<0.2	D
ENSG00000117174	ZNHIT6	N	N	N	2	N	NA	N	NA	N	>0.2	C
ENSG00000171502	COL24A1	Y	N	N	3	N	NA	N	NA	N	<0.2	D
ENSG00000122417	ODF2L	N	N	N	2	N	NA	N	NA	N	>0.2	C
ENSG00000137975	CLCA2	N	N	N	2	Y	NA	N	NA	Y	<0.2	D
ENSG00000016490	CLCA1	N	Y	N	2	Y	NA	N	N	N	<0.2	D
ENSG00000016602	CLCA4	N	Y	N	3	N	NA	N	NA	N	<0.2	C
ENSG00000097033	SH3GLB1	Y	N	N	3	N	NA	Y	N	Y	>0.2	NA
ENSG00000183291	SEP15	N	N	N	1	N	NA	N	N	N	<0.2	D
ENSG00000153936	HS2ST1	N	Y	N	1	N	NA	N	NA	N	<0.2	NA
ENSG00000267561	HS2ST1	N	Y	N	1	N	NA	N	NA	N	NA	B
ENSG00000143013	LMO4	N	N	N	2	Y	NA	N	Y	Y	<0.2	D
ENSG00000065243	PKN2	Y	N	N	2	N	NA	Y	NA	N	NA	D
ENSG00000137947	GTF2B	N	N	Y	1	N	NA	N	NA	Y	<0.2	NA
ENSG00000137944	CCBL2	N	N	N	3	N	NA	N	NA	N	<0.2	D
ENSG00000213516	RBMXL1	N	Y	N	NA	N	NA	N	NA	N	<0.2	NA
ENSG00000117226	GBP3	N	Y	N	2	N	NA	N	NA	N	>0.2	NA
ENSG00000117228	GBP1	N	Y	N	2	Y	NA	N	NA	Y	<0.2	C
ENSG00000162645	GBP2	N	Y	N	2	N	NA	N	NA	N	<0.2	D
ENSG00000213512	GBP7	N	Y	N	2	N	NA	N	NA	N	<0.2	C
ENSG00000162654	GBP4	N	Y	N	3	N	NA	N	NA	N	<0.2	D
ENSG00000154451	GBP5	N	Y	N	2	Y	NA	N	N	N	<0.2	D
ENSG00000183347	GBP6	N	Y	N	3	N	NA	N	NA	N	>0.2	C
ENSG00000197147	LRRC8B	N	N	N	1	N	NA	N	NA	N	>0.2	C
ENSG00000171488	LRRC8C	N	N	N	2	N	NA	N	NA	N	>0.2	NA
ENSG00000171492	LRRC8D	N	N	N	2	N	NA	N	NA	N	>0.2	D
ENSG00000162664	ZNF326	N	N	N	3	N	NA	N	NA	Y	NA	D
ENSG00000143032	BARHL2	Y	N	N	3	N	NA	N	NA	N	<0.2	C
ENSG00000122482	ZNF644	N	N	N	2	Y	NA	N	NA	Y	>0.2	C
ENSG00000162669	HFM1	N	N	N	3	N	NA	N	NA	N	<0.2	NA
ENSG00000097046	CDC7	N	N	N	2	N	NA	Y	Y	Y	<0.2	C
ENSG00000069702	TGFBR3	N	N	N	3	Y	NA	N	Y	Y	<0.2	D
ENSG00000137948	BRDT	Y	N	Y	3	Y	NA	N	NA	N	<0.2	C
ENSG00000172031	EPHX4	N	N	Y	2	N	NA	N	NA	N	<0.2	C
ENSG00000189195	BTBD8	N	N	N	2	N	NA	N	NA	N	>0.2	B
ENSG00000069712	KIAA1107	N	N	N	1	N	NA	N	NA	N	NA	C
ENSG00000203910	C1orf146	N	N	Y	3	N	NA	N	NA	N	NA	NA
ENSG00000174842	GLMN	N	N	Y	1	Y	AD	N	Y	Y	<0.2	NA
ENSG00000122484	RPAP2	N	N	N	2	N	NA	N	NA	Y	>0.2	NA
ENSG00000162676	GFI1	Y	N	N	2	Y	AR	N	Y	Y	NA	C
ENSG00000067208	EVI5	N	N	N	2	Y	NA	N	NA	Y	<0.2	C
ENSG00000122406	RPL5	N	N	N	3	Y	NA	N	NA	Y	<0.2	NA
ENSG00000154511	FAM69A	N	N	N	1	N	NA	N	NA	N	<0.2	NA
ENSG00000143033	MTF2	Y	N	N	2	N	NA	N	Y	N	<0.2	C
ENSG00000117500	TMED5	Y	N	N	2	N	NA	N	NA	N	<0.2	D
ENSG00000122483	CCDC18	N	N	N	1	Y	NA	N	NA	N	NA	D
ENSG00000117505	DR1	N	N	N	1	N	NA	N	NA	Y	<0.2	D
ENSG00000137942	FNBP1L	Y	N	N	2	N	NA	Y	NA	Y	>0.2	D
ENSG00000137936	BCAR3	Y	N	N	1	Y	NA	Y	N	N	>0.2	D
ENSG00000067334	DNTTIP2	N	N	N	2	N	NA	N	NA	Y	<0.2	D
ENSG00000023909	GCLM	N	N	N	2	Y	NA	N	N	Y	<0.2	D
ENSG00000198691	ABCA4	Y	N	N	3	Y	AD	N	N	N	<0.2	B
ENSG00000137962	ARHGAP29	Y	N	N	2	Y	NA	N	NA	N	<0.2	C
ENSG00000117528	ABCD3	N	N	N	2	Y	AR	N	NA	Y	<0.2	D
ENSG00000117525	F3	N	N	N	2	Y	NA	N	Y	Y	NA	D
ENSG00000143036	SLC44A3	Y	N	N	3	N	NA	N	N	N	>0.2	D
ENSG00000117519	CNN3	Y	N	N	2	Y	NA	Y	NA	Y	<0.2	D
ENSG00000172339	ALG14	N	N	N	2	N	NA	N	NA	N	<0.2	C
ENSG00000152078	TMEM56	N	N	Y	2	N	NA	N	NA	N	>0.2	C
ENSG00000122481	RWDD3	N	N	Y	2	N	NA	N	NA	Y	<0.2	D
ENSG00000237435	RP11-147C23.1	N	N	N	NA	N	NA	N	NA	N	NA	NA
ENSG00000117569	PTBP2	Y	N	N	3	N	NA	N	Y	Y	<0.2	D
ENSG00000188641	DPYD	N	N	N	3	Y	AR	N	NA	Y	<0.2	C
ENSG00000162627	SNX7	Y	N	N	3	N	NA	N	NA	N	<0.2	NA
ENSG00000117598	LPPR5	Y	N	N	3	N	NA	N	NA	N	<0.2	D
ENSG00000117600	LPPR4	Y	N	N	3	N	NA	N	NA	N	<0.2	C
ENSG00000099260	PALMD	N	N	Y	3	N	NA	N	NA	N	NA	NA
ENSG00000156869	FRRS1	N	N	N	2	N	NA	N	NA	N	>0.2	C
ENSG00000162688	AGL	N	N	N	2	Y	AR	N	NA	Y	<0.2	NA
ENSG00000117620	SLC35A3	N	N	N	1	N	NA	N	NA	N	<0.2	C
ENSG00000156875	HIAT1	Y	N	N	2	N	NA	N	N	N	<0.2	NA
ENSG00000156876	SASS6	N	N	N	1	N	NA	N	NA	N	>0.2	B
ENSG00000122435	TRMT13	N	N	N	2	N	NA	N	NA	N	<0.2	C
ENSG00000122477	LRRC39	N	N	N	2	N	NA	N	NA	N	>0.2	D
ENSG00000137992	DBT	N	N	N	2	Y	AR	N	Y	Y	<0.2	B
ENSG00000137996	RTCA	N	N	N	2	N	NA	N	NA	Y	<0.2	D
ENSG00000079335	CDC14A	Y	N	N	2	N	NA	N	NA	N	<0.2	C
ENSG00000181656	GPR88	N	N	N	1	N	NA	N	NA	N	>0.2	B
ENSG00000162692	VCAM1	N	N	N	3	Y	NA	N	Y	Y	>0.2	NA
ENSG00000162694	EXTL2	N	N	N	3	Y	NA	N	N	N	>0.2	B
ENSG00000162695	SLC30A7	N	N	N	3	N	NA	N	N	N	<0.2	C
ENSG00000117543	DPH5	N	N	N	1	N	NA	N	NA	N	<0.2	C
ENSG00000269175	AC093157.1	N	N	N	NA	N	NA	N	NA	N	NA	D
ENSG00000170989	S1PR1	Y	N	N	3	Y	NA	N	NA	Y	>0.2	D
ENSG00000118733	OLFM3	Y	N	N	3	N	NA	N	N	N	>0.2	B
ENSG00000060718	COL11A1	Y	N	N	3	Y	AD	N	NA	N	<0.2	B
ENSG00000185946	RNPC3	N	N	Y	1	N	NA	N	NA	Y	<0.2	C
ENSG00000240038	AMY2B	N	Y	Y	3	N	NA	N	NA	N	<0.2	NA
ENSG00000243480	AMY2A	N	Y	Y	2	N	NA	N	NA	N	<0.2	NA
ENSG00000237763	AMY1A	N	Y	Y	1	N	NA	N	NA	N	<0.2	C
ENSG00000174876	AMY1B	N	Y	Y	1	N	NA	N	NA	N	<0.2	C
ENSG00000187733	AMY1C	N	Y	Y	1	N	NA	N	NA	N	<0.2	C
ENSG00000198890	PRMT6	N	N	N	2	N	NA	N	NA	N	<0.2	NA
ENSG00000162631	NTNG1	N	N	N	3	Y	NA	N	N	N	<0.2	B
ENSG00000134215	VAV3	Y	N	N	3	Y	NA	Y	N	N	<0.2	C
ENSG00000085491	SLC25A24	Y	N	N	3	N	NA	N	NA	Y	<0.2	C
ENSG00000196427	NBPF4	N	Y	N	1	N	NA	N	NA	N	NA	NA
ENSG00000186086	NBPF6	N	Y	Y	1	N	NA	N	NA	N	NA	NA
ENSG00000162636	FAM102B	Y	N	N	2	N	NA	N	NA	N	<0.2	C
ENSG00000162639	HENMT1	N	N	N	1	N	NA	N	NA	N	>0.2	C
ENSG00000134186	PRPF38B	N	N	N	2	N	NA	N	NA	N	<0.2	D
ENSG00000143107	FNDC7	N	N	N	2	N	NA	N	NA	N	>0.2	C
ENSG00000116266	STXBP3	Y	N	N	1	Y	NA	N	NA	Y	<0.2	D
ENSG00000162641	AKNAD1	N	N	N	2	N	NA	N	NA	N	NA	C
ENSG00000121957	GPSM2	Y	N	N	1	Y	NA	N	N	Y	<0.2	D
ENSG00000121940	CLCC1	N	N	Y	2	N	NA	N	NA	N	<0.2	D
ENSG00000085433	WDR47	N	N	Y	1	N	NA	N	NA	Y	<0.2	D
ENSG00000197780	TAF13	N	N	Y	1	N	NA	N	NA	Y	NA	D
ENSG00000215717	TMEM167B	N	N	Y	3	N	NA	N	NA	N	<0.2	NA
ENSG00000179902	C1orf194	N	N	Y	1	N	NA	N	NA	N	>0.2	NA
ENSG00000116299	KIAA1324	N	N	N	2	N	NA	N	N	N	<0.2	C
ENSG00000031698	SARS	N	N	N	2	N	NA	N	NA	Y	<0.2	D
ENSG00000143126	CELSR2	Y	N	Y	2	N	NA	N	N	N	<0.2	C
ENSG00000134222	PSRC1	N	N	Y	1	N	NA	N	NA	Y	NA	NA
ENSG00000221986	MYBPHL	Y	Y	N	2	N	NA	N	NA	N	>0.2	C
ENSG00000134243	SORT1	N	N	N	1	Y	NA	N	Y	Y	<0.2	D
ENSG00000143106	PSMA5	N	N	N	1	Y	NA	N	NA	Y	<0.2	D
ENSG00000143028	SYPL2	N	N	N	2	N	NA	N	N	N	<0.2	C
ENSG00000162650	ATXN7L2	Y	N	N	1	N	NA	N	NA	N	>0.2	C
ENSG00000174151	CYB561D1	N	N	N	1	N	NA	N	NA	N	>0.2	D
ENSG00000181754	AMIGO1	Y	N	N	1	N	NA	N	NA	N	>0.2	B
ENSG00000156097	GPR61	Y	N	N	2	N	NA	N	NA	N	<0.2	C
ENSG00000065135	GNAI3	Y	N	N	1	Y	NA	N	N	Y	NA	C
ENSG00000134183	GNAT2	Y	N	N	2	Y	NA	N	NA	Y	<0.2	B
ENSG00000116337	AMPD2	N	N	Y	2	N	NA	N	N	N	<0.2	D
ENSG00000168765	GSTM4	Y	Y	N	3	Y	NA	N	NA	N	<0.2	NA
ENSG00000213366	GSTM2	Y	Y	Y	3	N	NA	N	NA	N	<0.2	NA
ENSG00000134184	GSTM1	N	Y	Y	1	Y	NA	N	NA	N	<0.2	NA
ENSG00000134201	GSTM5	N	Y	N	3	N	NA	N	NA	N	<0.2	NA
ENSG00000134202	GSTM3	Y	Y	N	2	Y	NA	N	NA	N	<0.2	NA
ENSG00000198758	EPS8L3	N	N	N	3	N	NA	Y	NA	N	<0.2	C
ENSG00000184371	CSF1	N	N	N	2	Y	NA	N	N	Y	NA	D
ENSG00000168710	AHCYL1	Y	N	N	1	N	NA	N	NA	Y	<0.2	D
ENSG00000143093	STRIP1	Y	N	N	1	N	NA	N	NA	Y	<0.2	B
ENSG00000156150	ALX3	N	N	N	1	Y	NA	N	NA	N	>0.2	B
ENSG00000186150	UBL4B	N	Y	N	2	N	NA	N	NA	N	<0.2	C
ENSG00000197106	SLC6A17	N	N	N	2	N	NA	N	NA	N	<0.2	D
ENSG00000116396	KCNC4	Y	N	N	3	Y	NA	N	N	N	<0.2	B
ENSG00000162775	RBM15	Y	N	N	2	Y	NA	N	Y	Y	>0.2	NA
ENSG00000168679	SLC16A4	N	N	N	2	N	NA	N	NA	N	>0.2	C
ENSG00000134248	LAMTOR5	N	N	N	3	N	NA	Y	NA	Y	>0.2	D
ENSG00000143125	PROK1	N	N	N	3	Y	NA	N	NA	N	>0.2	B
ENSG00000143105	KCNA10	Y	N	N	3	N	NA	N	NA	N	<0.2	B
ENSG00000177301	KCNA2	Y	N	N	3	Y	NA	N	Y	Y	<0.2	C
ENSG00000177272	KCNA3	Y	N	N	3	Y	NA	N	N	N	NA	B
ENSG00000143119	CD53	N	N	N	3	Y	NA	N	NA	Y	<0.2	D
ENSG00000121931	LRIF1	N	N	N	2	N	NA	N	NA	N	NA	NA
ENSG00000156171	DRAM2	Y	N	N	2	N	NA	N	N	N	<0.2	D
ENSG00000134255	CEPT1	Y	N	N	1	N	NA	N	NA	N	<0.2	D
ENSG00000162777	DENND2D	Y	N	N	2	N	NA	N	NA	Y	>0.2	NA
ENSG00000064886	CHI3L2	N	Y	N	2	Y	NA	N	NA	N	<0.2	NA
ENSG00000134216	CHIA	Y	N	N	3	Y	NA	N	NA	N	<0.2	NA
ENSG00000173947	PIFO	N	N	N	3	N	NA	N	NA	N	<0.2	NA
ENSG00000085465	OVGP1	Y	N	N	3	Y	NA	N	N	N	<0.2	C
ENSG00000116455	WDR77	N	N	N	1	N	NA	N	Y	Y	<0.2	NA
ENSG00000116459	ATP5F1	N	N	N	2	N	NA	N	NA	Y	<0.2	NA
ENSG00000143110	C1orf162	N	N	N	1	N	NA	N	NA	N	NA	C
ENSG00000121933	ADORA3	N	N	N	3	Y	NA	N	NA	N	>0.2	B
ENSG00000116473	RAP1A	Y	N	N	2	Y	NA	N	Y	Y	<0.2	D
ENSG00000197852	FAM212B	N	N	N	2	N	NA	N	NA	N	NA	NA
ENSG00000064703	DDX20	N	N	N	1	Y	NA	N	NA	Y	<0.2	C
ENSG00000171385	KCND3	Y	N	N	3	Y	NA	N	NA	N	<0.2	C
ENSG00000143079	CTTNBP2NL	N	N	Y	2	N	NA	N	NA	N	NA	NA
ENSG00000134245	WNT2B	Y	N	Y	3	Y	NA	N	N	N	<0.2	NA
ENSG00000007341	ST7L	Y	N	Y	1	N	NA	N	NA	N	<0.2	C
ENSG00000116489	CAPZA1	N	N	Y	1	Y	NA	N	NA	Y	<0.2	NA
ENSG00000155363	MOV10	N	N	Y	2	N	NA	N	NA	Y	<0.2	D
ENSG00000155366	RHOC	Y	N	N	2	Y	NA	N	N	Y	<0.2	D
ENSG00000155367	PPM1J	Y	N	N	1	N	NA	N	NA	N	<0.2	C
ENSG00000184599	FAM19A3	N	N	Y	1	N	NA	N	NA	N	NA	C
ENSG00000155380	SLC16A1	N	N	Y	2	Y	AD	N	NA	Y	>0.2	B
ENSG00000198799	LRIG2	Y	N	Y	1	N	NA	N	NA	N	<0.2	B
ENSG00000081026	MAGI3	Y	N	Y	3	N	NA	N	NA	N	<0.2	D
ENSG00000116793	PHTF1	N	N	Y	2	N	NA	N	NA	N	NA	B
ENSG00000081019	RSBN1	Y	N	Y	2	N	NA	N	NA	Y	<0.2	C
ENSG00000134242	PTPN22	N	N	Y	2	Y	AD	N	Y	N	>0.2	C
ENSG00000188761	BCL2L15	N	N	Y	3	N	NA	N	NA	N	NA	NA
ENSG00000134262	AP4B1	N	N	Y	2	Y	NA	N	NA	Y	<0.2	C
ENSG00000118655	DCLRE1B	N	N	Y	2	Y	NA	N	Y	Y	<0.2	NA
ENSG00000163349	HIPK1	Y	N	Y	3	Y	NA	N	Y	N	<0.2	D
ENSG00000116774	OLFML3	N	N	Y	2	N	NA	N	NA	N	>0.2	B
ENSG00000134207	SYT6	Y	N	Y	3	N	NA	N	N	N	<0.2	C
ENSG00000197323	TRIM33	N	N	Y	2	Y	AD	N	Y	Y	<0.2	D
ENSG00000116752	BCAS2	N	N	Y	3	Y	NA	N	NA	Y	<0.2	D
ENSG00000175984	DENND2C	Y	N	Y	2	N	NA	N	NA	N	>0.2	C
ENSG00000116748	AMPD1	N	N	Y	3	Y	AD	N	NA	N	<0.2	B
ENSG00000213281	NRAS	N	N	Y	3	Y	AD	Y	Y	Y	NA	NA
ENSG00000009307	CSDE1	N	N	Y	3	Y	NA	N	NA	Y	<0.2	NA
ENSG00000052723	SIKE1	N	N	Y	1	N	NA	N	NA	Y	<0.2	B
ENSG00000198765	SYCP1	N	N	Y	3	Y	NA	N	Y	N	>0.2	NA
ENSG00000134200	TSHB	N	N	Y	2	Y	AR	N	NA	N	NA	B
ENSG00000134198	TSPAN2	N	N	Y	3	N	NA	N	NA	N	>0.2	D
ENSG00000134259	NGF	N	N	Y	3	Y	AR	N	Y	Y	>0.2	C
ENSG00000173218	VANGL1	N	N	Y	3	Y	AD	N	Y	N	<0.2	C
ENSG00000118729	CASQ2	N	N	Y	3	Y	AR	N	N	N	>0.2	NA
ENSG00000177551	NHLH2	Y	N	Y	1	Y	NA	N	Y	Y	<0.2	C
ENSG00000163393	SLC22A15	N	N	Y	3	N	NA	N	NA	N	>0.2	C
ENSG00000173212	MAB21L3	N	N	Y	2	N	NA	N	NA	N	>0.2	D
ENSG00000163399	ATP1A1	N	N	N	2	N	NA	N	N	Y	<0.2	NA
ENSG00000269279	AL136376.1	N	N	N	NA	N	NA	N	NA	N	NA	NA
ENSG00000203865	ATP1A1OS	N	N	N	NA	N	NA	N	NA	N	NA	NA
ENSG00000116815	CD58	N	N	N	3	Y	NA	N	NA	N	NA	C
ENSG00000143061	IGSF3	N	N	N	3	N	NA	N	N	N	NA	B
ENSG00000203864	C1orf137	N	N	Y	NA	N	NA	N	NA	N	NA	NA
ENSG00000116824	CD2	N	N	Y	3	Y	NA	N	N	Y	>0.2	D
ENSG00000134247	PTGFRN	N	N	N	3	N	NA	N	N	Y	>0.2	C
ENSG00000134256	CD101	N	N	N	2	N	NA	N	N	N	NA	C
ENSG00000116830	TTF2	N	N	N	2	Y	NA	N	NA	Y	<0.2	C
ENSG00000134253	TRIM45	N	N	N	2	N	NA	N	NA	N	<0.2	C
ENSG00000134258	VTCN1	N	N	N	2	Y	NA	N	N	N	>0.2	C
ENSG00000198162	MAN1A2	Y	N	N	2	Y	NA	N	Y	N	<0.2	D
ENSG00000183508	FAM46C	Y	N	N	2	N	NA	N	NA	N	<0.2	B
ENSG00000196505	GDAP2	N	N	N	1	N	NA	N	NA	N	<0.2	C
ENSG00000065183	WDR3	N	N	Y	2	N	NA	N	NA	Y	<0.2	NA
ENSG00000155761	SPAG17	N	N	Y	3	Y	NA	N	NA	Y	<0.2	D
ENSG00000092607	TBX15	N	N	N	3	Y	AR	N	NA	N	<0.2	C
ENSG00000116874	WARS2	N	N	N	3	N	NA	N	N	N	<0.2	NA
ENSG00000116882	HAO2	N	N	Y	3	N	NA	N	NA	N	<0.2	NA
ENSG00000203859	HSD3B2	N	Y	Y	3	Y	NA	N	NA	N	<0.2	B
ENSG00000203857	HSD3B1	N	Y	Y	3	Y	NA	N	NA	N	<0.2	C
ENSG00000143067	ZNF697	N	Y	N	1	N	NA	N	NA	N	<0.2	C
ENSG00000092621	PHGDH	N	N	N	1	Y	AR	N	Y	Y	<0.2	C
ENSG00000134240	HMGCS2	Y	N	Y	3	Y	NA	N	NA	N	<0.2	C
ENSG00000134193	REG4	N	N	Y	3	Y	NA	N	N	N	>0.2	B
ENSG00000134249	ADAM30	N	Y	Y	3	N	NA	N	N	N	>0.2	C
ENSG00000134250	NOTCH2	Y	N	N	3	Y	AD	Y	Y	Y	<0.2	NA
ENSG00000188610	FAM72B	N	Y	Y	1	N	NA	N	NA	N	<0.2	NA
ENSG00000198019	FCGR1B	N	Y	N	NA	N	NA	N	NA	N	NA	NA
ENSG00000236334	PPIAL4G	N	Y	Y	3	N	NA	N	NA	N	<0.2	D
ENSG00000215784	FAM72D	N	Y	N	NA	N	NA	N	NA	N	<0.2	NA
ENSG00000162825	RP3-377D14.1	N	Y	Y	NA	N	NA	N	NA	N	NA	NA
ENSG00000231360	AL592284.1	N	N	N	NA	N	NA	N	NA	N	NA	NA
ENSG00000255854	PPIAL4B	N	Y	N	NA	N	NA	N	NA	Y	NA	D
ENSG00000168614	NBPF9	N	Y	Y	1	N	NA	N	NA	N	NA	NA
ENSG00000178104	PDE4DIP	N	N	Y	3	N	NA	N	NA	N	>0.2	C
ENSG00000268172	AL590452.1	N	N	N	NA	N	NA	N	NA	N	NA	B
ENSG00000213240	NOTCH2NL	N	Y	Y	3	N	NA	N	NA	N	NA	D
ENSG00000255168	RP11-458D21.5	N	Y	Y	NA	N	NA	N	NA	N	<0.2	NA
ENSG00000163386	NBPF10	N	Y	Y	NA	N	NA	N	NA	N	NA	NA
ENSG00000168509	HFE2	N	N	Y	2	Y	NA	N	N	N	<0.2	C
ENSG00000117289	TXNIP	N	N	Y	3	N	NA	N	N	N	>0.2	NA
ENSG00000121851	POLR3GL	Y	N	Y	1	N	NA	N	NA	N	<0.2	C
ENSG00000181039	ANKRD34A	N	N	Y	2	N	NA	N	NA	N	<0.2	C
ENSG00000152022	LIX1L	N	N	Y	2	N	NA	N	NA	N	<0.2	B
ENSG00000131795	RBM8A	N	N	Y	NA	Y	NA	N	NA	Y	<0.2	D
ENSG00000211451	GNRHR2	N	N	Y	NA	N	NA	N	NA	N	<0.2	B
ENSG00000131779	PEX11B	N	N	Y	2	Y	NA	N	Y	Y	>0.2	C
ENSG00000143127	ITGA10	N	N	Y	2	N	NA	N	N	Y	>0.2	C
ENSG00000198483	ANKRD35	N	N	Y	2	N	NA	N	NA	N	>0.2	D
ENSG00000131788	PIAS3	Y	N	Y	2	Y	NA	N	NA	Y	<0.2	NA
ENSG00000186364	NUDT17	N	N	Y	NA	N	NA	N	NA	N	>0.2	C
ENSG00000186141	POLR3C	N	N	Y	2	N	NA	N	NA	Y	<0.2	C
ENSG00000121848	RNF115	Y	N	Y	2	N	NA	N	NA	N	<0.2	D
ENSG00000117281	CD160	N	N	Y	2	Y	NA	N	NA	N	NA	C
ENSG00000174827	PDZK1	N	N	Y	1	Y	NA	N	N	Y	>0.2	B
ENSG00000117262	GPR89A	N	Y	Y	1	N	NA	N	NA	N	<0.2	NA
ENSG00000196644	GPR89C	N	Y	Y	NA	N	NA	N	NA	N	<0.2	NA
ENSG00000232637	NBPF12	N	Y	N	NA	N	NA	N	NA	N	NA	NA
ENSG00000152042	NBPF11	N	Y	Y	NA	N	NA	N	NA	N	NA	NA
ENSG00000186275	NBPF12	N	Y	N	NA	N	NA	N	NA	N	NA	NA
ENSG00000131791	PRKAB2	N	N	N	2	N	NA	N	N	Y	<0.2	C
ENSG00000131781	FMO5	N	Y	N	2	Y	NA	N	NA	N	<0.2	B
ENSG00000131778	CHD1L	N	N	Y	2	Y	NA	N	N	N	<0.2	D
ENSG00000116128	BCL9	N	N	N	2	Y	NA	N	NA	Y	NA	D
ENSG00000162836	ACP6	N	N	N	1	N	NA	N	N	N	<0.2	B
ENSG00000143140	GJA5	N	N	N	3	Y	AD	N	Y	Y	NA	B
ENSG00000121634	GJA8	N	N	Y	3	Y	AD	N	N	Y	NA	C
ENSG00000188092	GPR89B	N	Y	Y	1	N	NA	N	NA	N	<0.2	NA
ENSG00000203836	NBPF24	N	Y	Y	NA	N	NA	N	NA	N	NA	NA
ENSG00000269647	BX842679.1	N	Y	N	NA	N	NA	N	NA	N	NA	NA
ENSG00000255963	PPIAL4A	N	Y	N	1	N	NA	N	NA	Y	NA	D
ENSG00000122497	NBPF14	N	Y	Y	2	N	NA	N	NA	N	NA	NA
ENSG00000256374	PPIAL4D	N	Y	N	NA	N	NA	N	NA	N	NA	NA
ENSG00000203832	NBPF20	N	Y	Y	1	N	NA	N	NA	N	NA	NA
ENSG00000243452	NBPF15	N	Y	Y	1	N	NA	N	NA	N	NA	NA
ENSG00000203827	NBPF16	N	Y	Y	1	N	NA	N	NA	N	NA	NA
ENSG00000203817	FAM72C	N	Y	Y	NA	N	NA	N	NA	N	<0.2	NA
ENSG00000198161	PPIAL4C	N	Y	Y	NA	N	NA	N	NA	Y	<0.2	D
ENSG00000203815	AL358813.2	N	Y	Y	NA	N	NA	N	NA	N	NA	NA
ENSG00000150337	FCGR1A	N	Y	Y	1	Y	NA	N	N	Y	>0.2	B
ENSG00000203814	HIST2H2BF	N	Y	Y	3	N	NA	N	NA	N	NA	NA
ENSG00000183598	HIST2H3D	N	N	Y	3	N	NA	N	NA	N	NA	NA
ENSG00000183941	HIST2H4A	Y	Y	Y	NA	N	NA	N	NA	Y	NA	C
ENSG00000203811	HIST2H3C	N	N	Y	NA	N	NA	N	NA	Y	NA	NA
ENSG00000183558	HIST2H2AA3	N	Y	Y	NA	N	NA	N	NA	Y	<0.2	NA
ENSG00000203812	HIST2H2AA4	N	Y	Y	NA	N	NA	N	NA	Y	<0.2	NA
ENSG00000203852	HIST2H3A	N	N	Y	NA	N	NA	N	NA	N	NA	NA
ENSG00000182217	HIST2H4B	Y	N	Y	NA	N	NA	N	NA	Y	NA	C
ENSG00000184678	HIST2H2BE	N	Y	Y	3	N	NA	N	NA	Y	NA	NA
ENSG00000178096	BOLA1	N	N	Y	3	N	NA	N	NA	N	<0.2	B
ENSG00000184260	HIST2H2AC	N	Y	Y	3	N	NA	N	NA	Y	<0.2	NA
ENSG00000184270	HIST2H2AB	Y	N	Y	3	N	NA	N	NA	N	<0.2	D
ENSG00000159164	SV2A	Y	N	Y	3	N	NA	N	Y	N	<0.2	D
ENSG00000143368	SF3B4	N	N	Y	2	Y	NA	N	NA	Y	<0.2	NA
ENSG00000014914	MTMR11	Y	N	Y	2	Y	NA	N	NA	N	>0.2	C
ENSG00000163113	OTUD7B	Y	N	Y	2	N	NA	N	N	Y	<0.2	C
ENSG00000136631	VPS45	N	N	N	2	N	NA	N	NA	Y	<0.2	C
ENSG00000023902	PLEKHO1	Y	N	N	3	N	NA	Y	N	N	>0.2	NA
ENSG00000143401	ANP32E	Y	N	N	2	N	NA	N	N	Y	<0.2	D
ENSG00000118298	CA14	N	N	N	3	N	NA	N	Y	N	<0.2	D
ENSG00000117362	APH1A	Y	N	N	2	Y	NA	N	Y	Y	<0.2	NA
ENSG00000118292	C1orf54	N	N	N	2	Y	NA	N	NA	N	NA	C
ENSG00000159208	C1orf51	N	N	N	2	N	NA	N	NA	N	NA	B
ENSG00000187145	MRPS21	N	N	N	3	N	NA	N	NA	Y	NA	C
ENSG00000215857	AL138795.1	N	Y	N	NA	N	NA	N	NA	N	NA	NA
ENSG00000117360	PRPF3	N	N	N	1	Y	AD	N	Y	Y	<0.2	D
ENSG00000163125	RPRD2	N	N	N	2	N	NA	N	NA	Y	<0.2	D
ENSG00000143374	TARS2	N	N	N	3	N	NA	N	NA	N	<0.2	NA
ENSG00000143369	ECM1	N	N	N	3	Y	AR	N	Y	N	NA	NA
ENSG00000143382	ADAMTSL4	N	N	N	1	Y	AR	N	NA	N	>0.2	D
ENSG00000225996	AL356356.1	N	N	N	NA	N	NA	N	NA	N	NA	C
ENSG00000203804	C1orf138	N	N	N	NA	N	NA	N	NA	N	NA	NA
ENSG00000143384	MCL1	N	N	N	1	Y	NA	N	Y	Y	>0.2	C
ENSG00000143420	ENSA	Y	N	N	3	Y	NA	N	NA	N	<0.2	D
ENSG00000143457	GOLPH3L	N	N	N	2	N	NA	N	NA	N	<0.2	C
ENSG00000143452	HORMAD1	N	N	N	2	Y	NA	N	Y	N	<0.2	C
ENSG00000163131	CTSS	N	N	N	2	N	NA	N	N	N	<0.2	NA
ENSG00000143387	CTSK	N	N	Y	2	Y	AR	N	N	N	<0.2	NA
ENSG00000143437	ARNT	Y	N	N	2	Y	NA	N	Y	Y	<0.2	D
ENSG00000143379	SETDB1	N	N	N	2	N	NA	N	NA	Y	<0.2	D
ENSG00000143418	CERS2	Y	N	N	2	N	NA	N	N	Y	<0.2	NA
ENSG00000143412	ANXA9	N	N	N	1	N	NA	N	NA	N	<0.2	NA
ENSG00000143409	FAM63A	Y	N	N	2	N	NA	N	NA	N	<0.2	NA
ENSG00000143363	PRUNE	N	N	N	2	Y	NA	N	N	Y	>0.2	NA
ENSG00000163141	BNIPL	Y	N	N	3	N	NA	N	NA	N	<0.2	C
ENSG00000143443	C1orf56	N	N	N	1	N	NA	N	N	N	NA	NA
ENSG00000197622	CDC42SE1	N	N	N	1	N	NA	N	NA	N	NA	NA
ENSG00000213190	MLLT11	N	N	N	3	Y	NA	N	NA	N	NA	NA
ENSG00000143458	GABPB2	Y	N	N	2	N	NA	N	N	Y	<0.2	D
ENSG00000143434	SEMA6C	Y	N	N	1	N	NA	N	N	N	<0.2	NA
ENSG00000163154	TNFAIP8L2	Y	N	N	1	N	NA	N	N	N	NA	D
ENSG00000163155	LYSMD1	N	N	N	2	N	NA	N	NA	N	>0.2	D
ENSG00000163156	SCNM1	N	N	N	3	N	NA	N	NA	N	<0.2	D
ENSG00000163157	TMOD4	Y	N	N	1	N	NA	N	NA	N	<0.2	C
ENSG00000163159	VPS72	N	N	N	1	N	NA	N	NA	Y	<0.2	D
ENSG00000143398	PIP5K1A	Y	N	N	3	N	NA	N	Y	Y	<0.2	NA
ENSG00000159352	PSMD4	N	N	N	2	Y	NA	N	Y	Y	<0.2	D
ENSG00000232671	RP11-126K1.2	N	N	Y	NA	N	NA	N	NA	N	NA	NA
ENSG00000143373	ZNF687	Y	N	Y	1	N	NA	N	NA	Y	<0.2	D
ENSG00000143393	PI4KB	N	N	Y	1	N	NA	N	NA	N	<0.2	D
ENSG00000143390	RFX5	Y	N	Y	2	Y	AD	Y	N	Y	<0.2	D
ENSG00000143416	SELENBP1	N	N	Y	1	Y	NA	N	NA	Y	<0.2	NA
ENSG00000159377	PSMB4	N	N	Y	2	N	NA	N	NA	Y	<0.2	D
ENSG00000143442	POGZ	Y	N	N	3	Y	NA	N	NA	N	NA	D
ENSG00000143375	CGN	N	N	N	2	N	NA	N	NA	Y	>0.2	C
ENSG00000143367	TUFT1	N	N	N	2	N	NA	N	NA	N	NA	NA
ENSG00000143376	SNX27	N	N	N	2	N	NA	N	Y	N	<0.2	D
ENSG00000159409	CELF3	N	N	N	3	N	NA	N	N	N	<0.2	D
ENSG00000178796	RIIAD1	N	N	N	2	N	NA	N	NA	N	>0.2	NA
ENSG00000240510	AL589765.1	N	N	N	NA	N	NA	N	NA	N	NA	NA
ENSG00000143436	MRPL9	N	N	N	2	N	NA	N	NA	Y	<0.2	NA
ENSG00000143450	OAZ3	Y	N	N	2	N	NA	N	Y	N	<0.2	NA
ENSG00000182134	TDRKH	N	N	N	2	N	NA	N	NA	N	<0.2	B
ENSG00000213171	LINGO4	Y	N	N	2	N	NA	N	N	N	<0.2	B
ENSG00000143365	RORC	Y	N	N	1	N	NA	N	N	N	<0.2	B
ENSG00000225556	C2CD4D	N	N	N	1	N	NA	N	NA	N	<0.2	NA
ENSG00000196407	THEM5	N	Y	N	3	N	NA	N	N	N	>0.2	C
ENSG00000159445	THEM4	N	Y	N	2	N	NA	N	NA	N	>0.2	NA
ENSG00000197747	S100A10	N	N	N	2	Y	NA	N	N	Y	NA	D
ENSG00000163191	S100A11	N	Y	N	1	Y	NA	N	N	Y	NA	D
ENSG00000182898	TCHHL1	N	Y	N	3	N	NA	N	NA	Y	NA	NA
ENSG00000159450	TCHH	N	N	N	3	N	NA	N	NA	N	>0.2	C
ENSG00000215853	RPTN	N	Y	N	3	N	NA	N	NA	N	NA	D
ENSG00000197915	HRNR	N	Y	N	3	Y	NA	N	NA	N	NA	C
ENSG00000143631	FLG	N	Y	N	3	Y	AD	N	NA	Y	NA	D
ENSG00000143520	FLG2	N	Y	N	3	N	NA	N	NA	N	>0.2	D
ENSG00000143536	CRNN	N	Y	Y	3	N	NA	N	NA	N	NA	B
ENSG00000186207	LCE5A	N	Y	Y	3	Y	NA	N	NA	N	NA	NA
ENSG00000169509	CRCT1	N	Y	Y	1	N	NA	N	NA	N	NA	B
ENSG00000185966	LCE3E	N	Y	Y	3	N	NA	N	NA	N	NA	NA
ENSG00000163202	LCE3D	N	Y	Y	3	N	NA	N	NA	N	NA	C
ENSG00000244057	LCE3C	N	Y	Y	1	Y	NA	N	NA	N	NA	NA
ENSG00000187238	LCE3B	N	Y	Y	2	Y	NA	N	NA	N	NA	NA
ENSG00000185962	LCE3A	N	Y	Y	3	N	NA	N	NA	N	NA	NA
ENSG00000187223	LCE2D	N	Y	Y	3	N	NA	N	NA	N	NA	NA
ENSG00000159455	LCE2B	N	Y	Y	3	N	NA	N	NA	N	NA	C
ENSG00000187180	LCE2C	N	Y	Y	3	N	NA	N	NA	N	NA	NA
ENSG00000187173	LCE2A	N	Y	Y	3	N	NA	N	NA	N	NA	NA
ENSG00000187170	LCE4A	N	Y	Y	3	N	NA	N	NA	N	NA	NA
ENSG00000198854	C1orf68	N	Y	Y	2	N	NA	N	NA	N	>0.2	B
ENSG00000203786	KPRP	N	Y	Y	3	N	NA	N	NA	N	NA	C
ENSG00000240386	LCE1F	N	Y	Y	3	N	NA	N	NA	N	NA	NA
ENSG00000186226	LCE1E	N	Y	Y	2	N	NA	N	NA	N	NA	NA
ENSG00000172155	LCE1D	N	Y	Y	1	N	NA	N	NA	N	NA	NA
ENSG00000197084	LCE1C	N	Y	N	3	N	NA	N	NA	N	NA	NA
ENSG00000196734	LCE1B	N	Y	N	3	N	NA	N	NA	N	NA	NA
ENSG00000186844	LCE1A	N	Y	N	3	N	NA	N	NA	N	NA	NA
ENSG00000235942	LCE6A	N	N	N	NA	N	NA	N	NA	N	NA	NA
ENSG00000163206	SMCP	N	N	N	3	N	NA	N	Y	N	NA	C
ENSG00000163207	IVL	N	Y	N	3	Y	NA	N	N	N	>0.2	C
ENSG00000184148	SPRR4	N	Y	N	2	N	NA	N	NA	N	NA	NA
ENSG00000169474	SPRR1A	N	Y	N	3	N	NA	N	NA	N	>0.2	B
ENSG00000163209	SPRR3	N	Y	N	3	Y	NA	N	NA	N	>0.2	NA
ENSG00000169469	SPRR1B	N	Y	N	3	Y	NA	N	NA	N	>0.2	B
ENSG00000163216	SPRR2D	N	Y	N	3	N	NA	N	NA	N	NA	NA
ENSG00000241794	SPRR2A	N	Y	N	3	N	NA	N	NA	N	NA	NA
ENSG00000196805	SPRR2B	N	Y	N	3	N	NA	N	NA	N	NA	NA
ENSG00000203785	SPRR2E	N	Y	N	3	N	NA	N	NA	N	NA	NA
ENSG00000244094	SPRR2F	N	Y	Y	2	N	NA	N	NA	N	NA	NA
ENSG00000159516	SPRR2G	N	Y	N	3	N	NA	N	NA	N	NA	NA
ENSG00000203784	LELP1	N	Y	N	3	N	NA	N	NA	N	NA	NA
ENSG00000203783	PRR9	N	N	N	1	N	NA	N	NA	N	NA	NA
ENSG00000203782	LOR	N	N	N	1	Y	NA	N	N	N	NA	B
ENSG00000159527	PGLYRP3	N	Y	N	3	N	NA	N	N	N	<0.2	B
ENSG00000163218	PGLYRP4	N	Y	Y	2	N	NA	N	N	N	<0.2	B
ENSG00000163220	S100A9	N	Y	N	1	Y	NA	N	N	Y	NA	D
ENSG00000163221	S100A12	N	Y	N	3	Y	NA	N	NA	N	NA	C
ENSG00000143546	S100A8	N	Y	N	3	Y	NA	N	Y	N	NA	C
ENSG00000184330	S100A7A	N	Y	N	3	Y	NA	N	NA	N	NA	C
ENSG00000197364	S100A7L2	N	Y	N	3	N	NA	N	NA	N	NA	NA
ENSG00000143556	S100A7	N	Y	N	3	Y	NA	N	NA	Y	NA	C
ENSG00000197956	S100A6	N	Y	N	1	Y	NA	N	NA	Y	NA	D
ENSG00000196420	S100A5	N	Y	N	1	N	NA	N	NA	N	NA	C
ENSG00000196154	S100A4	N	Y	N	1	Y	NA	N	Y	Y	NA	NA
ENSG00000188015	S100A3	N	Y	N	2	N	NA	N	NA	N	NA	C
ENSG00000196754	S100A2	N	Y	N	2	Y	NA	N	NA	N	NA	B
ENSG00000188643	S100A16	N	N	N	2	N	NA	N	NA	Y	NA	C
ENSG00000189334	S100A14	N	Y	N	2	Y	NA	N	NA	N	NA	C
ENSG00000189171	S100A13	N	Y	N	2	Y	NA	N	NA	Y	NA	D
ENSG00000160678	S100A1	N	N	N	1	Y	NA	N	N	Y	NA	D
ENSG00000160679	CHTOP	N	N	N	3	N	NA	N	NA	N	<0.2	NA
ENSG00000143553	SNAPIN	N	N	N	1	N	NA	N	Y	Y	<0.2	NA
ENSG00000143621	ILF2	N	N	N	1	N	NA	N	Y	Y	<0.2	NA
ENSG00000169418	NPR1	Y	N	N	2	Y	NA	Y	Y	N	<0.2	D
ENSG00000143624	INTS3	N	N	N	2	N	NA	N	NA	Y	<0.2	D
ENSG00000143554	SLC27A3	N	N	N	1	N	NA	N	NA	N	<0.2	NA
ENSG00000143614	GATAD2B	Y	N	N	3	N	NA	N	NA	Y	<0.2	D
ENSG00000198837	DENND4B	Y	N	N	2	N	NA	N	NA	N	<0.2	D
ENSG00000160741	CRTC2	Y	N	N	2	N	NA	N	N	N	>0.2	C
ENSG00000143570	SLC39A1	N	N	N	2	N	NA	N	NA	Y	>0.2	D
ENSG00000143578	CREB3L4	Y	N	N	2	Y	NA	N	N	N	>0.2	B
ENSG00000143543	JTB	N	N	N	2	Y	NA	N	NA	N	<0.2	NA
ENSG00000143545	RAB13	N	N	N	2	N	NA	N	NA	N	<0.2	D
ENSG00000177954	RPS27	Y	N	N	1	N	NA	N	NA	Y	<0.2	NA
ENSG00000143552	NUP210L	N	N	N	2	N	NA	N	Y	N	>0.2	C
ENSG00000143549	TPM3	Y	N	N	3	Y	AD	N	NA	Y	NA	C
ENSG00000163263	C1orf189	N	N	N	3	N	NA	N	NA	N	>0.2	NA
ENSG00000143612	C1orf43	N	N	N	2	N	NA	N	NA	N	<0.2	NA
ENSG00000143569	UBAP2L	Y	N	N	3	N	NA	N	N	Y	<0.2	D
ENSG00000143575	HAX1	N	N	N	2	Y	AR	N	Y	Y	>0.2	D
ENSG00000143595	AQP10	Y	N	N	3	Y	NA	N	NA	N	<0.2	NA
ENSG00000143515	ATP8B2	Y	N	N	3	N	NA	N	NA	N	<0.2	B
ENSG00000160712	IL6R	N	N	N	3	Y	NA	N	N	Y	>0.2	C
ENSG00000169291	SHE	Y	N	N	2	N	NA	Y	NA	N	>0.2	D
ENSG00000163239	TDRD10	N	N	N	3	N	NA	N	NA	N	NA	C
ENSG00000160714	UBE2Q1	Y	N	N	2	N	NA	N	Y	N	<0.2	NA
ENSG00000160716	CHRNB2	Y	N	N	3	Y	NA	N	Y	Y	<0.2	D
ENSG00000160710	ADAR	N	N	N	2	Y	AD	N	Y	Y	<0.2	NA
ENSG00000268141	AL606500.1	N	N	N	NA	N	NA	N	NA	N	NA	NA
ENSG00000143603	KCNN3	Y	N	N	3	Y	NA	N	N	N	<0.2	C
ENSG00000163344	PMVK	N	N	N	2	Y	NA	N	NA	Y	<0.2	NA
ENSG00000163346	PBXIP1	N	N	N	2	N	NA	N	NA	Y	NA	NA
ENSG00000163348	PYGO2	Y	N	N	2	N	NA	N	Y	Y	NA	C
ENSG00000160691	SHC1	Y	N	N	3	N	NA	Y	Y	Y	<0.2	B
ENSG00000173207	CKS1B	Y	Y	N	2	Y	NA	N	NA	Y	NA	NA
ENSG00000160688	FLAD1	N	N	N	2	N	NA	N	NA	Y	<0.2	C
ENSG00000163352	LENEP	N	N	N	2	N	NA	N	NA	N	NA	NA
ENSG00000160685	ZBTB7B	N	N	N	3	N	NA	N	NA	N	>0.2	C
ENSG00000163354	DCST2	N	N	N	3	N	NA	N	NA	N	>0.2	NA
ENSG00000163357	DCST1	N	N	N	2	N	NA	N	NA	N	>0.2	NA
ENSG00000143537	ADAM15	N	N	N	2	N	NA	N	Y	Y	<0.2	NA
ENSG00000243364	EFNA4	Y	N	N	1	N	NA	N	NA	N	>0.2	NA
ENSG00000143590	EFNA3	Y	Y	N	1	N	NA	N	NA	N	>0.2	C
ENSG00000251246	EFNA3	Y	Y	N	NA	N	NA	N	NA	N	>0.2	NA
ENSG00000169242	EFNA1	Y	N	Y	2	Y	NA	N	N	N	>0.2	D
ENSG00000169241	SLC50A1	N	N	Y	1	N	NA	N	NA	N	>0.2	NA
ENSG00000179085	DPM3	N	N	Y	1	Y	NA	N	NA	Y	<0.2	D
ENSG00000163463	KRTCAP2	N	N	Y	2	N	NA	N	N	Y	NA	NA
ENSG00000163462	TRIM46	Y	N	Y	2	N	NA	N	NA	N	<0.2	C
ENSG00000185499	MUC1	N	N	Y	2	Y	NA	N	N	N	>0.2	NA
ENSG00000169231	THBS3	Y	N	Y	2	N	NA	N	N	N	<0.2	B
ENSG00000173171	MTX1	Y	N	Y	1	Y	NA	N	NA	Y	<0.2	NA
ENSG00000177628	GBA	N	N	Y	2	Y	AR	N	Y	N	<0.2	NA
ENSG00000160767	FAM189B	N	N	Y	2	N	NA	N	NA	N	>0.2	NA
ENSG00000116521	SCAMP3	Y	N	Y	2	N	NA	N	NA	Y	<0.2	D
ENSG00000176444	CLK2	Y	N	Y	3	Y	NA	N	N	N	<0.2	NA
ENSG00000143630	HCN3	Y	N	Y	1	N	NA	Y	N	N	<0.2	C
ENSG00000143627	PKLR	Y	N	Y	2	Y	AD	N	NA	N	<0.2	D
ENSG00000160752	FDPS	N	N	Y	1	Y	NA	N	NA	N	<0.2	D
ENSG00000160753	RUSC1	N	N	Y	3	N	NA	Y	NA	Y	>0.2	NA
ENSG00000116539	ASH1L	N	N	Y	2	N	NA	N	NA	N	<0.2	NA
ENSG00000125459	MSTO1	N	N	Y	1	N	NA	N	NA	Y	<0.2	NA
ENSG00000163374	YY1AP1	N	Y	Y	3	N	NA	N	NA	N	>0.2	NA
ENSG00000132676	DAP3	N	N	Y	3	N	NA	N	Y	Y	<0.2	NA
ENSG00000116580	GON4L	N	Y	Y	3	Y	NA	N	NA	Y	<0.2	C
ENSG00000132718	SYT11	Y	N	Y	3	Y	NA	N	NA	N	<0.2	C
ENSG00000143622	RIT1	N	N	Y	3	N	NA	N	NA	Y	<0.2	B
ENSG00000132680	KIAA0907	N	N	Y	2	N	NA	N	NA	N	<0.2	D
ENSG00000173080	RXFP4	N	N	Y	1	N	NA	N	N	N	<0.2	B
ENSG00000116584	ARHGEF2	Y	N	N	2	N	NA	Y	NA	Y	<0.2	C
ENSG00000163479	SSR2	N	N	N	2	N	NA	N	NA	Y	<0.2	D
ENSG00000160803	UBQLN4	Y	N	N	1	N	NA	N	NA	Y	<0.2	NA
ENSG00000116586	LAMTOR2	N	N	N	2	Y	AR	N	Y	Y	<0.2	D
ENSG00000132698	RAB25	N	N	N	1	Y	NA	N	N	N	<0.2	B
ENSG00000254726	MEX3A	Y	N	N	1	N	NA	N	NA	N	<0.2	NA
ENSG00000160789	LMNA	Y	N	N	1	Y	AD	N	Y	Y	<0.2	D
ENSG00000196189	SEMA4A	Y	N	N	2	Y	AD	N	N	Y	<0.2	D
ENSG00000160785	SLC25A44	N	N	N	2	N	NA	N	NA	Y	<0.2	D
ENSG00000260238	RP11-54H19.8	N	Y	N	NA	N	NA	N	NA	N	NA	B
ENSG00000160783	PMF1	N	Y	N	1	N	NA	N	NA	Y	NA	D
ENSG00000242252	BGLAP	N	N	N	3	N	NA	N	NA	N	NA	B
ENSG00000160781	PAQR6	Y	N	N	1	N	NA	N	NA	N	>0.2	D
ENSG00000198952	SMG5	N	N	N	2	N	NA	N	NA	N	<0.2	D
ENSG00000163472	TMEM79	N	N	N	3	N	NA	N	NA	N	NA	B
ENSG00000198715	C1orf85	N	N	N	2	N	NA	N	N	N	<0.2	D
ENSG00000189030	VHLL	N	Y	N	1	N	NA	N	NA	N	NA	NA
ENSG00000163468	CCT3	N	N	N	2	N	NA	N	Y	Y	<0.2	D
ENSG00000163467	TSACC	N	N	N	2	N	NA	N	NA	N	NA	NA
ENSG00000132677	RHBG	N	N	N	3	N	NA	N	N	N	<0.2	B
ENSG00000125462	C1orf61	N	N	N	1	N	NA	N	NA	N	NA	C
ENSG00000116604	MEF2D	Y	N	N	2	N	NA	N	Y	N	<0.2	D
ENSG00000183856	IQGAP3	Y	N	N	2	Y	NA	Y	N	N	<0.2	D
ENSG00000187862	TTC24	N	N	N	2	N	NA	N	NA	N	<0.2	C
ENSG00000163382	APOA1BP	Y	N	N	1	Y	NA	N	NA	N	<0.2	NA
ENSG00000160818	GPATCH4	N	N	N	2	N	NA	N	NA	N	<0.2	D
ENSG00000132702	HAPLN2	N	N	N	1	N	NA	N	NA	N	>0.2	C
ENSG00000132692	BCAN	N	N	N	3	Y	NA	N	NA	N	>0.2	D
ENSG00000132688	NES	N	N	N	2	Y	NA	N	Y	Y	<0.2	D
ENSG00000143320	CRABP2	Y	N	N	3	Y	NA	N	Y	N	<0.2	B
ENSG00000143319	ISG20L2	Y	N	N	2	N	NA	N	NA	N	<0.2	B
ENSG00000143303	RRNAD1	N	N	N	1	N	NA	N	NA	N	<0.2	C
ENSG00000143314	MRPL24	N	N	N	1	N	NA	N	NA	Y	<0.2	D
ENSG00000143321	HDGF	N	Y	N	3	Y	NA	N	NA	Y	<0.2	NA
ENSG00000143294	PRCC	N	N	N	2	Y	NA	N	NA	Y	<0.2	D
ENSG00000027869	SH2D2A	Y	N	N	3	N	NA	Y	N	N	>0.2	NA
ENSG00000198400	NTRK1	Y	N	N	3	Y	AD	N	Y	Y	<0.2	NA
ENSG00000027644	INSRR	N	N	N	3	N	NA	N	Y	N	<0.2	B
ENSG00000187800	PEAR1	N	N	N	3	Y	NA	N	NA	N	<0.2	B
ENSG00000160838	LRRC71	N	N	N	1	N	NA	N	NA	N	<0.2	C
ENSG00000132694	ARHGEF11	Y	N	N	3	Y	NA	Y	Y	N	<0.2	D
ENSG00000253831	ETV3L	Y	Y	N	3	N	NA	N	NA	N	NA	NA
ENSG00000117036	ETV3	Y	Y	N	2	N	NA	N	NA	Y	NA	C
ENSG00000143297	FCRL5	N	Y	N	3	Y	NA	N	N	N	>0.2	B
ENSG00000163518	FCRL4	N	Y	N	3	Y	NA	N	NA	N	>0.2	C
ENSG00000160856	FCRL3	N	Y	N	3	Y	AD	N	NA	N	>0.2	B
ENSG00000132704	FCRL2	N	Y	N	3	N	NA	N	NA	N	>0.2	NA
ENSG00000163534	FCRL1	N	Y	N	3	N	NA	N	N	N	>0.2	B
ENSG00000073754	CD5L	N	Y	N	3	N	NA	N	N	N	<0.2	B
ENSG00000183853	KIRREL	Y	N	N	3	N	NA	N	Y	Y	>0.2	C
ENSG00000158473	CD1D	N	Y	N	3	N	NA	N	NA	Y	NA	C
ENSG00000158477	CD1A	N	Y	N	3	Y	NA	N	NA	Y	NA	B
ENSG00000158481	CD1C	N	Y	N	3	Y	NA	N	NA	Y	NA	C
ENSG00000158485	CD1B	N	Y	N	3	Y	NA	N	NA	Y	NA	C
ENSG00000158488	CD1E	N	Y	N	3	Y	NA	N	NA	N	NA	C
ENSG00000186306	OR10T2	N	Y	N	3	N	NA	N	NA	N	>0.2	C
ENSG00000180708	OR10K2	N	Y	N	3	N	NA	N	NA	N	>0.2	B
ENSG00000173285	OR10K1	N	Y	N	3	N	NA	N	NA	N	>0.2	B
ENSG00000198965	OR10R2	N	Y	N	3	N	NA	N	NA	N	>0.2	B
ENSG00000197532	OR6Y1	N	Y	Y	3	N	NA	N	NA	N	>0.2	C
ENSG00000186440	OR6P1	N	Y	N	2	N	NA	N	NA	N	>0.2	B
ENSG00000186400	OR10X1	N	Y	N	3	Y	NA	N	NA	N	>0.2	C
ENSG00000198967	OR10Z1	N	Y	N	3	N	NA	N	NA	N	>0.2	C
ENSG00000163554	SPTA1	Y	N	N	3	Y	AD	Y	NA	N	<0.2	C
ENSG00000196171	OR6K2	N	Y	N	3	N	NA	N	NA	N	>0.2	NA
ENSG00000203757	OR6K3	N	Y	N	3	N	NA	N	NA	N	>0.2	C
ENSG00000180433	OR6K6	N	Y	N	3	N	NA	N	NA	N	>0.2	C
ENSG00000197403	OR6N1	N	Y	N	3	N	NA	N	NA	N	>0.2	C
ENSG00000188340	OR6N2	N	Y	N	3	N	NA	N	NA	N	>0.2	C
ENSG00000163563	MNDA	N	Y	N	3	Y	NA	N	NA	N	NA	D
ENSG00000163564	PYHIN1	N	Y	N	3	N	NA	N	NA	N	NA	D
ENSG00000163565	IFI16	N	Y	N	2	Y	NA	N	NA	N	NA	NA
ENSG00000163568	AIM2	N	Y	N	3	Y	NA	N	N	N	NA	C
ENSG00000162706	CADM3	Y	N	N	3	N	NA	N	N	N	>0.2	B
ENSG00000213088	DARC	N	N	N	3	Y	AD	N	N	N	NA	NA
ENSG00000179639	FCER1A	N	Y	N	3	Y	NA	N	N	N	>0.2	NA
ENSG00000196266	OR10J3	N	Y	N	3	N	NA	N	NA	N	>0.2	B
ENSG00000196184	OR10J1	N	Y	N	3	N	NA	N	NA	N	>0.2	B
ENSG00000184155	OR10J5	N	Y	N	3	N	NA	N	NA	N	>0.2	C
ENSG00000132703	APCS	N	Y	N	3	Y	NA	N	N	Y	>0.2	B
ENSG00000132693	CRP	N	Y	N	3	Y	NA	N	N	N	>0.2	C
ENSG00000158716	DUSP23	N	N	N	1	Y	NA	N	NA	N	<0.2	D
ENSG00000181036	FCRL6	N	Y	N	3	Y	NA	N	NA	N	>0.2	D
ENSG00000158714	SLAMF8	N	N	N	3	N	NA	N	N	N	NA	C
ENSG00000188004	C1orf204	N	N	N	1	N	NA	N	NA	N	NA	NA
ENSG00000243284	VSIG8	Y	N	N	1	N	NA	N	N	N	>0.2	C
ENSG00000256029	RP11-190A12.7	N	N	N	NA	N	NA	N	NA	N	NA	NA
ENSG00000213085	CCDC19	N	N	N	3	N	NA	N	NA	N	<0.2	C
ENSG00000269620	AL590560.1	N	N	N	NA	N	NA	N	NA	N	NA	NA
ENSG00000158710	TAGLN2	N	N	N	2	N	NA	Y	NA	Y	NA	D
ENSG00000085552	IGSF9	Y	N	N	2	N	NA	N	N	N	<0.2	D
ENSG00000162723	SLAMF9	N	Y	N	3	N	NA	N	N	N	NA	D
ENSG00000143315	PIGM	N	N	N	2	Y	AR	N	NA	N	<0.2	B
ENSG00000177807	KCNJ10	N	N	N	2	Y	AR	N	Y	Y	<0.2	B
ENSG00000162728	KCNJ9	Y	N	N	3	Y	NA	N	Y	Y	NA	C
ENSG00000162729	IGSF8	N	N	N	3	Y	NA	N	NA	N	NA	B
ENSG00000018625	ATP1A2	Y	N	N	3	Y	AD	N	Y	Y	<0.2	NA
ENSG00000132681	ATP1A4	Y	N	N	3	Y	NA	N	Y	Y	<0.2	C
ENSG00000143318	CASQ1	N	N	N	2	N	NA	N	N	N	>0.2	B
ENSG00000162734	PEA15	N	N	N	2	N	NA	N	N	Y	NA	NA
ENSG00000132716	DCAF8	N	Y	N	3	N	NA	N	NA	N	<0.2	NA
ENSG00000258465	WDR42A	N	Y	N	NA	N	NA	N	NA	N	NA	C
ENSG00000162735	PEX19	N	Y	N	2	Y	AR	N	NA	Y	<0.2	C
ENSG00000122218	COPA	N	N	N	3	Y	NA	N	NA	Y	<0.2	D
ENSG00000162736	NCSTN	N	N	N	2	Y	NA	N	Y	Y	<0.2	D
ENSG00000171786	NHLH1	Y	N	N	3	N	NA	N	Y	N	<0.2	C
ENSG00000162738	VANGL2	N	N	N	3	Y	NA	N	N	Y	<0.2	B
ENSG00000162739	SLAMF6	N	Y	N	3	Y	NA	N	N	Y	>0.2	D
ENSG00000066294	CD84	N	Y	N	3	N	NA	N	N	N	NA	B
ENSG00000117090	SLAMF1	N	N	N	3	N	NA	N	N	N	NA	B
ENSG00000117091	CD48	N	N	N	2	N	NA	N	N	Y	NA	C
ENSG00000026751	SLAMF7	N	Y	N	3	N	NA	N	N	N	NA	NA
ENSG00000122224	LY9	N	Y	N	3	N	NA	N	N	N	>0.2	NA
ENSG00000122223	CD244	N	N	N	3	Y	NA	N	N	N	NA	B
ENSG00000179914	ITLN1	N	Y	N	3	N	NA	N	NA	N	<0.2	C
ENSG00000158764	ITLN2	N	Y	N	2	N	NA	N	NA	N	<0.2	NA
ENSG00000158769	F11R	Y	N	N	2	N	NA	N	Y	Y	>0.2	D
ENSG00000215845	TSTD1	N	N	N	1	N	NA	N	NA	N	<0.2	NA
ENSG00000158773	USF1	Y	N	N	2	Y	AD	N	Y	Y	>0.2	NA
ENSG00000186517	ARHGAP30	Y	N	N	3	N	NA	N	NA	N	>0.2	B
ENSG00000268154	AL591806.1	N	Y	N	NA	N	NA	N	NA	N	NA	NA
ENSG00000143217	PVRL4	Y	N	N	2	Y	NA	N	NA	N	>0.2	B
ENSG00000162755	KLHDC9	N	N	N	2	N	NA	N	NA	N	>0.2	NA
ENSG00000143256	PFDN2	N	N	N	1	N	NA	N	Y	Y	<0.2	D
ENSG00000158793	NIT1	N	N	N	2	N	NA	N	N	N	>0.2	D
ENSG00000158796	DEDD	N	N	N	1	N	NA	N	N	N	<0.2	NA
ENSG00000143222	UFC1	N	N	N	2	N	NA	N	NA	Y	<0.2	D
ENSG00000143258	USP21	Y	N	N	3	N	NA	N	N	N	<0.2	NA
ENSG00000143224	PPOX	N	N	N	2	Y	AD	N	NA	N	<0.2	NA
ENSG00000158850	B4GALT3	N	N	N	3	N	NA	N	NA	N	<0.2	NA
ENSG00000158859	ADAMTS4	N	N	N	3	Y	NA	N	Y	N	<0.2	D
ENSG00000158864	NDUFS2	N	N	N	2	Y	AR	N	NA	Y	<0.2	D
ENSG00000158869	FCER1G	N	N	N	2	N	NA	N	Y	Y	NA	D
ENSG00000268387	AL590714.1	N	N	N	NA	N	NA	N	NA	N	NA	NA
ENSG00000158874	APOA2	N	N	N	3	Y	AD	N	N	Y	NA	C
ENSG00000158882	TOMM40L	Y	N	N	1	N	NA	N	NA	Y	<0.2	B
ENSG00000143257	NR1I3	N	N	N	3	Y	NA	N	N	N	<0.2	B
ENSG00000248485	PCP4L1	N	N	N	2	N	NA	N	NA	N	<0.2	NA
ENSG00000158887	MPZ	N	N	N	2	Y	AD	N	N	N	NA	C
ENSG00000143252	SDHC	N	N	N	1	Y	AD	N	NA	Y	<0.2	NA
ENSG00000188931	C1orf192	N	N	N	2	N	NA	N	NA	N	<0.2	C
ENSG00000143226	FCGR2A	N	Y	Y	3	Y	NA	N	NA	N	>0.2	C
ENSG00000173110	HSPA6	N	Y	Y	1	N	NA	N	NA	Y	<0.2	D
ENSG00000203747	FCGR3A	N	Y	Y	3	Y	AD	N	NA	N	NA	NA
ENSG00000072694	FCGR2B	N	Y	Y	2	Y	AD	N	NA	N	>0.2	D
ENSG00000162747	FCGR3B	N	Y	Y	3	Y	NA	N	NA	N	NA	B
ENSG00000132185	FCRLA	N	Y	Y	3	N	NA	N	NA	N	NA	B
ENSG00000162746	FCRLB	N	Y	Y	2	N	NA	N	N	N	NA	C
ENSG00000081721	DUSP12	N	N	Y	1	N	NA	N	NA	N	<0.2	NA
ENSG00000118217	ATF6	Y	N	Y	3	Y	NA	N	N	N	<0.2	D
ENSG00000162745	OLFML2B	N	N	Y	3	N	NA	N	NA	N	>0.2	C
ENSG00000198929	NOS1AP	N	Y	N	3	Y	NA	N	NA	N	<0.2	D
ENSG00000254706	RP11-565P22.6	N	Y	Y	NA	N	NA	N	NA	N	>0.2	NA
ENSG00000239887	C1orf226	N	N	Y	1	N	NA	N	NA	N	NA	NA
ENSG00000171722	C1orf111	N	N	Y	2	N	NA	N	NA	N	NA	B
ENSG00000198574	SH2D1B	N	N	Y	3	Y	NA	Y	NA	N	>0.2	C
ENSG00000152332	UHMK1	N	N	Y	3	N	NA	N	N	N	<0.2	D
ENSG00000117143	UAP1	Y	N	Y	2	N	NA	N	NA	Y	<0.2	D
ENSG00000162733	DDR2	Y	N	Y	3	Y	AR	N	N	N	<0.2	C
ENSG00000132196	HSD17B7	N	N	Y	1	N	NA	N	Y	N	<0.2	NA
ENSG00000185860	C1orf110	N	N	Y	3	N	NA	N	NA	N	NA	NA
ENSG00000117152	RGS4	Y	N	N	3	Y	AD	N	N	N	>0.2	B
ENSG00000143248	RGS5	Y	N	N	3	Y	NA	N	Y	N	>0.2	D
ENSG00000143228	NUF2	N	N	N	3	Y	NA	N	NA	Y	>0.2	D
ENSG00000185630	PBX1	Y	N	N	3	Y	NA	N	Y	Y	<0.2	D
ENSG00000162761	LMX1A	Y	N	N	3	N	NA	N	N	N	<0.2	C
ENSG00000143171	RXRG	Y	N	N	3	Y	NA	N	N	N	<0.2	B
ENSG00000162763	LRRC52	N	N	N	3	N	NA	N	NA	N	>0.2	B
ENSG00000143198	MGST3	N	N	N	2	Y	NA	N	NA	Y	<0.2	NA
ENSG00000143149	ALDH9A1	N	N	N	3	N	NA	N	NA	N	<0.2	D
ENSG00000143183	TMCO1	N	N	N	2	Y	NA	N	NA	Y	<0.2	C
ENSG00000143179	UCK2	Y	N	N	2	Y	NA	N	NA	Y	<0.2	NA
ENSG00000188859	FAM78B	Y	N	N	3	N	NA	N	NA	N	<0.2	C
ENSG00000267884	AL626787.1	N	N	N	NA	N	NA	N	NA	N	NA	NA
ENSG00000143157	POGK	N	N	N	2	N	NA	N	NA	N	>0.2	B
ENSG00000152382	TADA1	N	N	N	1	N	NA	N	NA	Y	<0.2	C
ENSG00000143195	ILDR2	N	N	N	2	N	NA	N	NA	N	NA	C
ENSG00000143194	MAEL	N	N	Y	3	N	NA	N	NA	Y	<0.2	NA
ENSG00000143167	GPA33	Y	N	Y	3	Y	NA	N	NA	N	>0.2	B
ENSG00000198842	DUSP27	N	N	Y	3	N	NA	N	NA	N	<0.2	C
ENSG00000143190	POU2F1	Y	N	N	3	N	NA	N	Y	Y	>0.2	NA
ENSG00000198821	CD247	N	N	N	3	Y	NA	N	N	Y	NA	B
ENSG00000143162	CREG1	N	N	N	1	N	NA	N	NA	Y	>0.2	D
ENSG00000198771	RCSD1	N	N	N	3	N	NA	N	NA	Y	NA	B
ENSG00000197965	MPZL1	N	N	N	2	N	NA	N	N	N	NA	C
ENSG00000143199	ADCY10	N	N	N	2	Y	AD	Y	Y	N	<0.2	C
ENSG00000143158	MPC2	N	N	Y	2	N	NA	N	NA	N	<0.2	NA
ENSG00000143164	DCAF6	N	N	Y	2	Y	NA	N	NA	N	<0.2	NA
ENSG00000235471	AL033532.1	N	N	Y	NA	N	NA	N	NA	N	NA	NA
ENSG00000143147	GPR161	N	N	Y	1	N	NA	N	Y	N	<0.2	B
ENSG00000143155	TIPRL	N	N	Y	1	N	NA	N	NA	Y	NA	NA
ENSG00000213064	SFT2D2	N	N	Y	1	N	NA	N	NA	N	<0.2	B
ENSG00000214262	ANKRD36BP1	N	N	Y	1	N	NA	N	NA	N	NA	C
ENSG00000143178	TBX19	N	N	Y	3	Y	AR	N	NA	N	<0.2	B
ENSG00000143185	XCL2	N	Y	N	3	N	NA	N	NA	N	NA	NA
ENSG00000143184	XCL1	N	Y	N	3	Y	NA	N	NA	N	NA	B
ENSG00000143196	DPT	N	N	N	3	N	NA	N	N	N	>0.2	B
ENSG00000143153	ATP1B1	Y	N	Y	1	Y	NA	N	NA	Y	<0.2	NA
ENSG00000143156	NME7	N	N	Y	3	N	NA	N	N	N	<0.2	D
ENSG00000117475	BLZF1	N	N	Y	3	Y	NA	N	NA	Y	<0.2	D
ENSG00000117477	C1orf114	N	N	Y	2	N	NA	N	NA	N	NA	D
ENSG00000117479	SLC19A2	N	N	Y	1	Y	AR	N	Y	N	>0.2	C
ENSG00000198734	F5	N	N	Y	3	Y	AD	N	Y	N	<0.2	NA
ENSG00000174175	SELP	N	N	Y	3	Y	AD	N	Y	N	>0.2	B
ENSG00000000460	C1orf112	N	N	N	2	N	NA	N	NA	N	>0.2	NA
ENSG00000188404	SELL	N	N	N	2	Y	AD	N	N	N	>0.2	B
ENSG00000007908	SELE	N	N	N	3	Y	AD	N	Y	N	>0.2	C
ENSG00000171806	METTL18	N	N	N	1	N	NA	N	NA	N	<0.2	C
ENSG00000000457	SCYL3	N	N	N	3	N	NA	N	N	N	<0.2	C
ENSG00000075945	KIFAP3	N	N	N	3	Y	NA	N	Y	Y	<0.2	D
ENSG00000203740	METTL11B	Y	N	N	2	N	NA	N	NA	N	<0.2	C
ENSG00000120370	GORAB	N	N	N	3	Y	AR	N	NA	N	<0.2	NA
ENSG00000116132	PRRX1	Y	N	N	3	Y	NA	N	Y	N	NA	NA
ENSG00000117501	C1orf129	N	Y	N	3	N	NA	N	NA	N	>0.2	D
ENSG00000007933	FMO3	N	Y	Y	3	Y	AR	N	NA	N	<0.2	B
ENSG00000117507	FMO6P	N	Y	Y	1	Y	NA	N	NA	N	<0.2	B
ENSG00000094963	FMO2	N	Y	Y	3	Y	NA	N	NA	N	<0.2	NA
ENSG00000010932	FMO1	N	Y	Y	3	Y	NA	N	NA	Y	<0.2	B
ENSG00000076258	FMO4	N	Y	Y	3	Y	NA	N	NA	N	<0.2	B
ENSG00000117523	PRRC2C	Y	N	Y	2	Y	NA	N	NA	N	<0.2	C
ENSG00000034971	MYOC	Y	N	Y	3	Y	AD	N	NA	N	>0.2	C
ENSG00000117533	VAMP4	N	N	Y	2	N	NA	N	N	Y	<0.2	D
ENSG00000010165	METTL13	N	N	N	3	N	NA	N	NA	Y	<0.2	B
ENSG00000197959	DNM3	Y	N	N	3	N	NA	Y	Y	Y	<0.2	B
ENSG00000135845	PIGC	N	N	N	2	N	NA	N	NA	Y	>0.2	C
ENSG00000180999	C1orf105	N	N	N	3	N	NA	N	NA	N	NA	B
ENSG00000094975	SUCO	N	N	N	3	N	NA	N	Y	N	NA	NA
ENSG00000117560	FASLG	N	N	N	3	Y	AD	N	Y	Y	>0.2	B
ENSG00000120337	TNFSF18	N	N	N	2	Y	NA	N	NA	N	NA	B
ENSG00000117586	TNFSF4	N	N	N	2	Y	AD	N	N	N	NA	NA
ENSG00000117592	PRDX6	N	N	Y	3	Y	NA	N	NA	Y	<0.2	NA
ENSG00000162753	SLC9C2	N	Y	N	3	N	NA	N	NA	N	<0.2	NA
ENSG00000183831	ANKRD45	N	N	N	3	N	NA	N	NA	N	<0.2	C
ENSG00000228394	BX248409.1	N	Y	N	NA	N	NA	N	NA	N	NA	NA
ENSG00000076321	KLHL20	N	N	N	3	N	NA	N	Y	N	<0.2	B
ENSG00000120334	CENPL	N	N	N	1	N	NA	N	NA	Y	>0.2	D
ENSG00000117593	DARS2	N	N	N	2	Y	AR	N	NA	N	<0.2	NA
ENSG00000185278	ZBTB37	N	N	N	3	N	NA	N	NA	N	>0.2	C
ENSG00000117601	SERPINC1	N	N	N	3	Y	AD	N	Y	N	<0.2	B
ENSG00000135870	RC3H1	Y	N	N	3	N	NA	N	Y	Y	<0.2	C
ENSG00000152061	RABGAP1L	Y	N	N	3	N	NA	N	N	N	<0.2	D
ENSG00000203737	GPR52	Y	N	N	3	N	NA	N	NA	N	<0.2	B
ENSG00000116161	CACYBP	N	N	N	2	N	NA	N	N	Y	<0.2	D
ENSG00000120333	MRPS14	N	N	N	3	N	NA	N	NA	Y	NA	D
ENSG00000120332	TNN	Y	N	N	3	N	NA	N	NA	Y	<0.2	B
ENSG00000235750	KIAA0040	N	N	N	NA	N	NA	N	NA	N	NA	NA
ENSG00000265365	KIAA0040	N	N	N	NA	N	NA	N	NA	N	NA	NA
ENSG00000116147	TNR	Y	N	N	3	Y	NA	N	N	N	>0.2	C
ENSG00000143207	RFWD2	N	N	N	2	Y	NA	N	Y	Y	<0.2	NA
ENSG00000116183	PAPPA2	Y	N	N	3	N	NA	N	N	N	<0.2	D
ENSG00000152092	ASTN1	Y	N	N	3	N	NA	N	N	N	<0.2	B
ENSG00000198797	FAM5B	N	N	N	3	N	NA	N	NA	N	<0.2	B
ENSG00000120341	SEC16B	Y	N	N	2	N	NA	N	NA	N	<0.2	D
ENSG00000075391	RASAL2	Y	N	N	3	N	NA	Y	NA	Y	<0.2	D
ENSG00000240021	TEX35	N	N	N	3	N	NA	N	NA	N	NA	D
ENSG00000213057	C1orf220	N	N	N	1	N	NA	N	NA	N	NA	NA
ENSG00000184909	C1ORF220	N	N	N	NA	N	NA	N	NA	N	NA	NA
ENSG00000116191	RALGPS2	Y	N	N	3	N	NA	Y	NA	N	<0.2	D
ENSG00000116194	ANGPTL1	Y	N	N	2	N	NA	N	N	N	<0.2	NA
ENSG00000116199	FAM20B	N	N	N	2	N	NA	N	Y	N	<0.2	NA
ENSG00000186283	TOR3A	Y	N	N	2	N	NA	N	NA	N	<0.2	D
ENSG00000143322	ABL2	Y	N	N	3	Y	NA	Y	Y	Y	<0.2	NA
ENSG00000057252	SOAT1	Y	N	N	2	Y	NA	N	N	Y	<0.2	D
ENSG00000162779	AXDND1	N	N	N	3	N	NA	N	NA	N	<0.2	NA
ENSG00000269064	AL160286.1	N	N	N	NA	N	NA	N	NA	N	NA	NA
ENSG00000116218	NPHS2	N	N	N	2	Y	AR	N	Y	Y	>0.2	B
ENSG00000162782	TDRD5	N	N	N	3	N	NA	N	Y	N	>0.2	NA
ENSG00000143340	FAM163A	N	N	N	3	N	NA	N	NA	N	NA	C
ENSG00000169905	TOR1AIP2	N	Y	N	2	N	NA	N	NA	N	>0.2	D
ENSG00000258664	IFRG15	N	N	N	NA	N	NA	N	NA	N	NA	D
ENSG00000143337	TOR1AIP1	N	Y	N	2	N	NA	N	Y	Y	>0.2	D
ENSG00000135837	CEP350	N	N	N	3	N	NA	N	NA	N	<0.2	D
ENSG00000116260	QSOX1	Y	N	N	2	N	NA	N	NA	N	<0.2	D
ENSG00000121454	LHX4	Y	N	Y	1	Y	AD	N	Y	N	<0.2	B
ENSG00000135847	ACBD6	N	N	N	1	Y	NA	N	NA	N	>0.2	C
ENSG00000143324	XPR1	N	N	N	3	N	NA	N	N	N	NA	B
ENSG00000135835	KIAA1614	N	N	N	1	N	NA	N	NA	N	>0.2	B
ENSG00000234237	AL162431.1	N	Y	N	NA	N	NA	N	NA	N	NA	NA
ENSG00000135823	STX6	Y	N	N	2	N	NA	N	NA	Y	NA	C
ENSG00000153029	MR1	N	Y	N	3	Y	NA	N	N	N	NA	C
ENSG00000162783	IER5	N	N	N	1	N	NA	N	NA	N	<0.2	D
ENSG00000198216	CACNA1E	Y	N	N	3	Y	NA	N	N	N	<0.2	C
ENSG00000179930	ZNF648	N	N	N	3	N	NA	N	NA	N	>0.2	B
ENSG00000135821	GLUL	N	N	N	2	Y	AR	N	NA	Y	<0.2	NA
ENSG00000203730	TEDDM1	N	N	N	2	N	NA	N	NA	N	>0.2	B
ENSG00000121446	RGSL1	N	N	N	1	N	NA	N	NA	N	NA	D
ENSG00000135828	RNASEL	N	N	Y	2	Y	AD	N	N	Y	>0.2	D
ENSG00000143333	RGS16	Y	N	Y	3	N	NA	N	N	N	<0.2	NA
ENSG00000135824	RGS8	Y	N	N	3	N	NA	N	NA	N	<0.2	C
ENSG00000135838	NPL	N	N	N	3	Y	NA	N	N	N	<0.2	NA
ENSG00000135829	DHX9	N	N	N	2	N	NA	N	Y	Y	<0.2	NA
ENSG00000157060	SHCBP1L	N	N	N	2	N	NA	N	NA	N	>0.2	NA
ENSG00000135862	LAMC1	Y	N	N	3	Y	AD	N	Y	Y	<0.2	B
ENSG00000058085	LAMC2	Y	N	N	2	Y	AR	N	Y	N	<0.2	D
ENSG00000157064	NMNAT2	N	N	N	3	N	NA	N	Y	N	<0.2	B
ENSG00000116698	SMG7	N	N	N	2	N	NA	N	NA	N	>0.2	NA
ENSG00000116701	NCF2	Y	N	N	3	Y	AR	Y	NA	Y	<0.2	B
ENSG00000162704	ARPC5	Y	N	N	1	N	NA	N	NA	Y	<0.2	NA
ENSG00000143344	RGL1	Y	N	N	3	N	NA	N	NA	N	<0.2	NA
ENSG00000173627	APOBEC4	N	N	N	3	N	NA	N	NA	N	NA	NA
ENSG00000198756	GLT25D2	Y	N	N	3	N	NA	N	NA	N	<0.2	C
ENSG00000198860	TSEN15	N	N	N	2	N	NA	N	NA	Y	>0.2	D
ENSG00000116667	C1orf21	N	N	N	1	N	NA	N	NA	N	>0.2	NA
ENSG00000116406	EDEM3	N	N	N	1	N	NA	N	NA	N	<0.2	C
ENSG00000135842	FAM129A	N	N	N	2	Y	NA	N	N	N	NA	NA
ENSG00000121481	RNF2	Y	N	N	3	N	NA	N	Y	Y	<0.2	C
ENSG00000121486	TRMT1L	N	N	N	1	N	NA	N	N	Y	<0.2	NA
ENSG00000116668	SWT1	N	N	N	2	N	NA	N	NA	N	>0.2	C
ENSG00000116679	IVNS1ABP	N	N	N	3	N	NA	N	N	Y	<0.2	D
ENSG00000143341	HMCN1	Y	N	N	3	Y	NA	N	NA	Y	<0.2	D
ENSG00000116690	PRG4	N	N	N	3	Y	AR	N	N	N	>0.2	C
ENSG00000047410	TPR	N	N	N	3	Y	AD	N	NA	Y	>0.2	NA
ENSG00000157181	C1orf27	N	N	N	2	N	NA	N	NA	N	>0.2	NA
ENSG00000268662	AL596220.1	N	N	N	NA	N	NA	N	NA	N	NA	NA
ENSG00000262180	OCLM	N	N	N	1	N	NA	N	NA	N	NA	D
ENSG00000116703	PDC	Y	N	N	2	N	NA	N	N	N	<0.2	NA
ENSG00000073756	PTGS2	Y	N	N	3	Y	NA	N	Y	Y	<0.2	C
ENSG00000116711	PLA2G4A	N	N	N	3	Y	NA	N	N	Y	<0.2	C
ENSG00000162670	FAM5C	N	N	N	3	N	NA	N	NA	N	>0.2	C
ENSG00000150681	RGS18	Y	N	N	3	N	NA	N	NA	N	<0.2	D
ENSG00000253148	RGS21	Y	N	N	3	N	NA	N	NA	N	<0.2	C
ENSG00000090104	RGS1	N	N	N	3	Y	NA	N	N	N	>0.2	D
ENSG00000127074	RGS13	N	N	N	3	N	NA	N	N	N	<0.2	C
ENSG00000116741	RGS2	Y	N	N	1	Y	NA	N	N	N	<0.2	D
ENSG00000116750	UCHL5	N	N	N	2	N	NA	Y	Y	Y	<0.2	NA
ENSG00000116747	TROVE2	N	N	N	2	Y	NA	N	Y	Y	<0.2	D
ENSG00000023572	GLRX2	N	N	N	1	N	NA	N	N	N	<0.2	D
ENSG00000134371	CDC73	N	N	N	3	Y	AD	N	NA	Y	<0.2	C
ENSG00000162630	B3GALT2	N	N	N	3	Y	NA	N	NA	N	<0.2	C
ENSG00000162687	KCNT2	Y	N	N	3	N	NA	N	NA	N	<0.2	D
ENSG00000000971	CFH	N	Y	N	3	Y	AD	N	NA	Y	<0.2	C
ENSG00000116785	CFHR3	N	Y	Y	2	Y	AD	N	NA	N	>0.2	NA
ENSG00000244414	CFHR1	N	Y	Y	3	Y	AD	N	NA	N	>0.2	NA
ENSG00000080910	CFHR2	N	Y	Y	3	Y	NA	N	NA	N	>0.2	NA
ENSG00000134365	CFHR4	N	Y	Y	3	N	NA	N	NA	N	>0.2	NA
ENSG00000134389	CFHR5	N	Y	Y	3	Y	NA	N	NA	N	>0.2	NA
ENSG00000143278	F13B	N	Y	Y	3	Y	AR	N	NA	N	<0.2	C
ENSG00000066279	ASPM	N	N	N	3	Y	AR	Y	N	N	>0.2	B
ENSG00000177888	ZBTB41	N	N	N	3	Y	NA	N	NA	N	>0.2	C
ENSG00000134376	CRB1	Y	N	N	3	Y	AR	N	N	Y	<0.2	B
ENSG00000213047	DENND1B	Y	N	N	3	N	NA	N	NA	N	<0.2	C
ENSG00000203724	C1orf53	N	N	N	3	N	NA	N	NA	N	NA	B
ENSG00000143355	LHX9	Y	N	N	3	N	NA	N	Y	N	NA	C
ENSG00000151414	NEK7	Y	N	N	3	N	NA	Y	Y	Y	NA	D
ENSG00000151418	ATP6V1G3	Y	N	N	3	N	NA	N	NA	N	<0.2	NA
ENSG00000081237	PTPRC	N	N	N	3	Y	AR	N	Y	Y	<0.2	C
ENSG00000116833	NR5A2	Y	N	N	3	Y	NA	N	Y	Y	<0.2	C
ENSG00000203721	C1orf98	N	N	N	NA	N	NA	N	NA	N	NA	NA
ENSG00000162702	ZNF281	N	N	N	1	N	NA	N	Y	Y	>0.2	NA
ENSG00000118193	KIF14	N	N	Y	2	Y	NA	N	NA	Y	<0.2	C
ENSG00000118197	DDX59	N	N	N	3	N	NA	N	NA	N	<0.2	D
ENSG00000118200	CAMSAP2	Y	N	N	2	N	NA	Y	NA	Y	<0.2	C
ENSG00000170128	GPR25	N	N	Y	1	N	NA	N	NA	N	>0.2	NA
ENSG00000163362	C1orf106	Y	N	Y	2	N	NA	N	NA	N	>0.2	C
ENSG00000116852	KIF21B	N	N	Y	2	N	NA	N	NA	Y	<0.2	D
ENSG00000081248	CACNA1S	Y	N	N	2	Y	AD	N	N	N	<0.2	NA
ENSG00000232237	ASCL5	Y	N	N	NA	N	NA	N	NA	N	NA	C
ENSG00000116857	TMEM9	Y	N	N	1	Y	NA	N	NA	Y	<0.2	NA
ENSG00000163395	IGFN1	Y	N	N	1	N	NA	N	NA	N	<0.2	C
ENSG00000081277	PKP1	Y	N	N	2	Y	NA	N	NA	Y	<0.2	B
ENSG00000118194	TNNT2	Y	N	N	3	Y	AD	N	Y	Y	NA	NA
ENSG00000159166	LAD1	N	N	N	2	Y	NA	N	NA	N	NA	C
ENSG00000159173	TNNI1	Y	N	N	3	Y	NA	N	NA	Y	NA	C
ENSG00000174307	PHLDA3	N	N	N	2	N	NA	Y	N	N	NA	D
ENSG00000159176	CSRP1	Y	N	N	1	N	NA	N	N	N	<0.2	D
ENSG00000269690	AC096677.1	N	N	N	NA	N	NA	N	NA	N	NA	NA
ENSG00000134369	NAV1	Y	N	N	2	N	NA	N	NA	Y	<0.2	C
ENSG00000198700	IPO9	N	N	N	2	N	NA	N	Y	Y	<0.2	D
ENSG00000198892	SHISA4	N	N	N	1	N	NA	N	N	N	>0.2	D
ENSG00000163431	LMOD1	N	N	N	2	Y	NA	N	NA	N	<0.2	NA
ENSG00000134375	TIMM17A	Y	N	N	3	N	NA	N	NA	Y	<0.2	D
ENSG00000176393	RNPEP	Y	N	N	1	N	NA	N	NA	N	<0.2	NA
ENSG00000163435	ELF3	Y	N	N	3	Y	NA	Y	NA	N	NA	C
ENSG00000170075	GPR37L1	N	N	N	2	N	NA	N	N	N	<0.2	B
ENSG00000143862	ARL8A	Y	N	N	1	N	NA	N	NA	N	<0.2	C
ENSG00000143851	PTPN7	N	N	N	1	N	NA	N	N	N	<0.2	NA
ENSG00000133067	LGR6	N	N	N	2	N	NA	N	N	N	>0.2	NA
ENSG00000077152	UBE2T	N	N	N	2	N	NA	N	NA	Y	<0.2	B
ENSG00000077157	PPP1R12B	Y	N	N	2	N	NA	N	NA	Y	<0.2	C
ENSG00000143858	SYT2	N	N	Y	3	Y	NA	N	NA	N	<0.2	B
ENSG00000117139	KDM5B	N	N	N	3	Y	NA	N	NA	N	>0.2	B
ENSG00000184774	RP11-480I12.4	Y	N	N	NA	N	NA	N	NA	N	NA	NA
ENSG00000183155	RABIF	N	N	N	3	N	NA	N	NA	N	<0.2	D
ENSG00000117153	KLHL12	N	N	N	2	N	NA	N	NA	Y	<0.2	NA
ENSG00000159346	ADIPOR1	N	N	N	2	Y	NA	N	N	N	<0.2	D
ENSG00000159348	CYB5R1	N	N	N	2	N	NA	N	NA	Y	<0.2	D
ENSG00000163444	TMEM183A	N	N	N	1	N	NA	N	NA	N	<0.2	D
ENSG00000143847	PPFIA4	Y	N	N	3	N	NA	N	NA	N	<0.2	NA
ENSG00000122180	MYOG	N	N	N	1	Y	NA	N	Y	Y	NA	NA
ENSG00000163485	ADORA1	N	N	N	3	Y	NA	Y	N	N	<0.2	C
ENSG00000133055	MYBPH	N	Y	N	2	N	NA	N	NA	N	<0.2	B
ENSG00000133048	CHI3L1	Y	Y	N	2	Y	AD	N	N	N	<0.2	D
ENSG00000133063	CHIT1	Y	Y	N	3	Y	NA	N	N	N	<0.2	NA
ENSG00000159388	BTG2	N	N	N	3	Y	NA	N	N	N	NA	NA
ENSG00000122176	FMOD	N	N	N	3	Y	NA	N	N	N	>0.2	D
ENSG00000188783	PRELP	N	N	N	3	N	NA	N	NA	N	>0.2	D
ENSG00000188770	OPTC	Y	N	N	3	Y	NA	N	N	N	>0.2	B
ENSG00000058668	ATP2B4	Y	N	N	3	Y	NA	Y	Y	N	<0.2	D
ENSG00000122188	LAX1	N	N	N	3	N	NA	N	N	N	NA	D
ENSG00000058673	ZC3H11A	N	Y	N	2	N	NA	N	NA	Y	>0.2	NA
ENSG00000257315	ZBED6	N	N	N	1	N	NA	N	NA	N	NA	NA
ENSG00000182004	SNRPE	N	Y	N	3	N	NA	N	NA	Y	<0.2	B
ENSG00000143842	SOX13	Y	N	N	1	Y	NA	N	N	N	<0.2	D
ENSG00000143845	ETNK2	Y	N	N	1	N	NA	N	N	N	<0.2	B
ENSG00000143839	REN	Y	N	N	2	Y	AR	N	Y	N	<0.2	B
ENSG00000170498	KISS1	N	N	N	1	Y	NA	N	Y	N	NA	B
ENSG00000174567	GOLT1A	Y	N	N	2	N	NA	N	NA	N	<0.2	C
ENSG00000143850	PLEKHA6	N	N	N	3	N	NA	Y	NA	N	>0.2	C
ENSG00000158615	PPP1R15B	N	N	N	3	Y	NA	N	Y	N	NA	C
ENSG00000133056	PIK3C2B	Y	N	N	2	N	NA	N	N	Y	<0.2	D
ENSG00000198625	MDM4	N	N	N	1	Y	NA	N	Y	Y	<0.2	D
ENSG00000170382	LRRN2	Y	N	N	3	N	NA	N	N	N	<0.2	D
ENSG00000163531	NFASC	Y	N	N	3	N	NA	N	Y	N	<0.2	D
ENSG00000184144	CNTN2	Y	N	N	2	Y	NA	N	N	N	<0.2	C
ENSG00000174529	TMEM81	N	N	N	2	N	NA	N	N	N	NA	B
ENSG00000117222	RBBP5	N	N	N	3	N	NA	N	NA	Y	<0.2	C
ENSG00000133059	DSTYK	N	N	N	2	N	NA	N	NA	N	<0.2	D
ENSG00000133069	TMCC2	N	N	N	2	N	NA	N	NA	N	NA	D
ENSG00000163545	NUAK2	Y	N	N	2	N	NA	N	Y	Y	<0.2	NA
ENSG00000162873	KLHDC8A	N	N	N	1	N	NA	N	NA	N	<0.2	NA
ENSG00000186007	LEMD1	N	N	N	1	N	NA	N	NA	N	>0.2	C
ENSG00000117266	CDK18	Y	N	N	2	N	NA	N	NA	N	<0.2	NA
ENSG00000174514	MFSD4	N	N	N	1	N	NA	N	NA	N	<0.2	C
ENSG00000158711	ELK4	Y	N	N	3	N	NA	Y	N	Y	NA	C
ENSG00000158715	SLC45A3	N	N	N	2	Y	NA	N	NA	N	<0.2	C
ENSG00000069275	NUCKS1	N	N	N	3	N	NA	N	NA	Y	NA	B
ENSG00000268313	AC119673.1	N	N	N	NA	N	NA	N	NA	N	NA	NA
ENSG00000117280	RAB7L1	N	N	N	2	Y	NA	N	NA	N	<0.2	D
ENSG00000133065	SLC41A1	Y	N	N	2	Y	NA	N	NA	N	<0.2	C
ENSG00000162877	PM20D1	N	N	N	2	N	NA	N	NA	N	<0.2	C
ENSG00000174502	SLC26A9	Y	N	N	3	Y	NA	N	N	N	>0.2	C
ENSG00000196550	FAM72A	N	Y	Y	NA	N	NA	N	NA	N	<0.2	NA
ENSG00000198049	AVPR1B	Y	N	Y	NA	Y	NA	N	N	N	<0.2	D
ENSG00000196533	C1orf186	N	N	N	3	N	NA	N	NA	N	NA	C
ENSG00000196188	CTSE	Y	N	N	1	Y	NA	N	N	N	<0.2	NA
ENSG00000163486	SRGAP2	Y	N	N	1	Y	NA	Y	N	N	<0.2	B
ENSG00000143466	IKBKE	Y	N	N	2	Y	NA	N	N	Y	<0.2	B
ENSG00000162888	C1orf147	N	N	N	NA	N	NA	N	NA	N	NA	NA
ENSG00000136653	RASSF5	Y	N	N	1	Y	NA	N	N	Y	<0.2	C
ENSG00000143486	EIF2D	N	N	N	2	N	NA	N	NA	Y	<0.2	NA
ENSG00000143479	DYRK3	Y	N	N	3	N	NA	N	N	N	<0.2	NA
ENSG00000162889	MAPKAPK2	Y	N	Y	2	Y	NA	Y	Y	Y	<0.2	D
ENSG00000136634	IL10	N	N	Y	3	Y	NA	N	Y	N	NA	C
ENSG00000142224	IL19	N	Y	Y	3	Y	NA	N	N	N	NA	B
ENSG00000162891	IL20	N	Y	Y	3	Y	NA	N	N	N	NA	NA
ENSG00000162892	IL24	N	Y	N	3	Y	NA	N	N	N	NA	B
ENSG00000162894	FAIM3	N	Y	N	1	N	NA	N	N	N	NA	NA
ENSG00000162896	PIGR	N	Y	N	3	Y	AD	N	N	N	>0.2	D
ENSG00000162897	FCAMR	N	Y	N	2	Y	NA	N	N	N	NA	C
ENSG00000182795	C1orf116	N	N	N	2	N	NA	N	NA	N	NA	B
ENSG00000180667	YOD1	N	N	N	2	N	NA	N	NA	N	<0.2	B
ENSG00000123836	PFKFB2	Y	N	N	2	N	NA	N	NA	Y	<0.2	B
ENSG00000123843	C4BPB	N	N	N	1	Y	NA	N	NA	N	>0.2	NA
ENSG00000123838	C4BPA	N	Y	N	3	Y	NA	N	NA	N	<0.2	B
ENSG00000196352	CD55	N	Y	N	2	Y	NA	N	NA	Y	>0.2	NA
ENSG00000117322	CR2	N	Y	N	3	Y	NA	N	N	Y	<0.2	NA
ENSG00000203710	CR1	N	Y	N	3	Y	NA	N	NA	Y	<0.2	C
ENSG00000197721	CR1L	N	Y	N	3	N	NA	N	NA	N	<0.2	NA
ENSG00000117335	CD46	N	Y	N	2	Y	AD	N	N	N	<0.2	NA
ENSG00000203709	C1orf132	N	N	N	NA	N	NA	N	NA	N	NA	NA
ENSG00000174059	CD34	N	N	N	2	Y	NA	N	N	N	NA	NA
ENSG00000076356	PLXNA2	Y	N	N	2	Y	NA	N	N	Y	<0.2	D
ENSG00000008118	CAMK1G	Y	N	N	2	N	NA	Y	N	Y	<0.2	B
ENSG00000196878	LAMB3	Y	N	N	2	Y	AR	N	NA	N	<0.2	B
ENSG00000123689	G0S2	N	N	N	1	N	NA	N	NA	N	NA	NA
ENSG00000117594	HSD11B1	N	N	N	2	Y	AR	N	N	N	>0.2	C
ENSG00000009790	TRAF3IP3	Y	N	N	3	N	NA	N	NA	N	>0.2	C
ENSG00000162757	C1orf74	N	N	N	3	N	NA	N	NA	N	>0.2	B
ENSG00000117595	IRF6	N	N	N	3	Y	AD	N	Y	N	>0.2	B
ENSG00000117597	DIEXF	N	N	N	3	N	NA	N	NA	N	<0.2	B
ENSG00000143469	SYT14	Y	N	N	3	Y	NA	N	NA	N	<0.2	D
ENSG00000082497	SERTAD4	N	N	N	3	N	NA	N	NA	N	NA	C
ENSG00000054392	HHAT	N	N	N	3	N	NA	N	Y	N	>0.2	C
ENSG00000143473	KCNH1	Y	N	N	3	Y	NA	N	N	N	<0.2	NA
ENSG00000117625	RCOR3	Y	N	N	2	N	NA	N	NA	Y	<0.2	NA
ENSG00000082512	TRAF5	Y	N	N	3	N	NA	N	N	Y	>0.2	C
ENSG00000198570	RD3	N	N	N	3	Y	NA	N	NA	N	<0.2	B
ENSG00000170385	SLC30A1	N	N	N	1	Y	NA	N	NA	Y	>0.2	D
ENSG00000117650	NEK2	N	N	N	2	Y	NA	Y	NA	Y	NA	D
ENSG00000123684	LPGAT1	N	N	N	2	N	NA	N	NA	N	<0.2	D
ENSG00000143493	INTS7	N	N	N	1	N	NA	N	NA	Y	<0.2	C
ENSG00000143476	DTL	N	N	N	1	N	NA	N	Y	Y	>0.2	NA
ENSG00000066027	PPP2R5A	Y	Y	N	2	N	NA	N	NA	Y	<0.2	NA
ENSG00000065600	TMEM206	N	N	N	2	N	NA	N	NA	N	NA	NA
ENSG00000117691	NENF	N	N	N	1	N	NA	N	NA	Y	<0.2	D
ENSG00000162772	ATF3	Y	N	N	3	Y	NA	N	N	N	>0.2	NA
ENSG00000162771	FAM71A	N	Y	N	3	N	NA	N	NA	N	NA	B
ENSG00000123685	BATF3	Y	N	N	2	Y	NA	N	N	N	NA	C
ENSG00000117697	NSL1	N	N	N	2	N	NA	N	NA	Y	NA	NA
ENSG00000203705	TATDN3	N	N	Y	1	N	NA	N	NA	N	<0.2	C
ENSG00000185523	C1orf227	N	N	N	2	Y	NA	N	NA	N	NA	NA
ENSG00000162769	FLVCR1	N	N	N	1	Y	NA	N	Y	N	<0.2	B
ENSG00000143494	VASH2	Y	N	N	3	N	NA	N	N	N	<0.2	C
ENSG00000174606	ANGEL2	Y	N	N	2	N	NA	N	NA	N	<0.2	C
ENSG00000136643	RPS6KC1	Y	N	N	2	N	NA	N	NA	N	<0.2	B
ENSG00000117707	PROX1	Y	N	N	3	Y	NA	N	NA	N	NA	B
ENSG00000143499	SMYD2	N	N	N	2	N	NA	N	NA	N	<0.2	B
ENSG00000152104	PTPN14	N	N	N	3	Y	NA	N	N	N	<0.2	B
ENSG00000117724	CENPF	N	N	N	2	Y	NA	N	NA	Y	NA	C
ENSG00000082482	KCNK2	Y	N	N	3	N	NA	N	N	N	>0.2	B
ENSG00000136636	KCTD3	Y	N	N	3	N	NA	N	NA	Y	<0.2	D
ENSG00000042781	USH2A	N	N	N	3	Y	AD	N	N	Y	<0.2	C
ENSG00000196482	ESRRG	Y	N	N	3	Y	NA	N	Y	N	<0.2	NA
ENSG00000092978	GPATCH2	Y	N	N	3	N	NA	N	NA	N	<0.2	B
ENSG00000162814	SPATA17	N	N	N	3	N	NA	N	NA	N	<0.2	B
ENSG00000067533	RRP15	N	N	N	3	N	NA	N	NA	N	<0.2	C
ENSG00000092969	TGFB2	Y	N	N	3	Y	NA	N	Y	N	<0.2	B
ENSG00000228208	C1orf143	N	N	N	NA	N	NA	N	NA	N	NA	NA
ENSG00000143353	LYPLAL1	N	N	N	3	N	NA	N	NA	N	<0.2	C
ENSG00000196660	SLC30A10	N	N	N	2	Y	NA	N	NA	N	<0.2	B
ENSG00000136628	EPRS	N	N	N	2	Y	NA	N	NA	Y	<0.2	NA
ENSG00000162813	BPNT1	N	N	N	2	N	NA	N	Y	N	<0.2	C
ENSG00000067704	IARS2	N	N	N	3	N	NA	N	NA	Y	<0.2	D
ENSG00000118873	RAB3GAP2	N	N	N	2	Y	AR	N	NA	Y	<0.2	D
ENSG00000224867	AC096644.1	N	N	N	NA	N	NA	N	NA	N	NA	NA
ENSG00000116141	MARK1	Y	N	N	3	Y	NA	N	NA	Y	<0.2	NA
ENSG00000162817	C1orf115	N	N	N	1	Y	NA	N	NA	N	NA	D
ENSG00000117791	MARC2	N	Y	N	1	N	NA	N	NA	N	<0.2	D
ENSG00000186205	MARC1	N	Y	N	1	N	NA	N	NA	Y	<0.2	D
ENSG00000136630	HLX	N	N	N	3	Y	NA	N	Y	N	<0.2	B
ENSG00000143507	DUSP10	N	N	N	3	N	NA	N	N	N	<0.2	C
ENSG00000143512	HHIPL2	Y	N	N	3	N	NA	N	N	N	<0.2	B
ENSG00000143498	TAF1A	N	N	N	2	N	NA	N	NA	Y	>0.2	NA
ENSG00000154305	MIA3	Y	N	N	2	Y	NA	Y	NA	N	>0.2	B
ENSG00000186063	AIDA	N	N	N	1	N	NA	N	NA	N	<0.2	NA
ENSG00000162819	BROX	N	N	N	2	N	NA	N	NA	N	<0.2	D
ENSG00000197520	FAM177B	Y	N	N	3	N	NA	N	NA	N	<0.2	NA
ENSG00000154309	DISP1	Y	N	N	2	Y	NA	N	Y	N	<0.2	C
ENSG00000187554	TLR5	N	N	N	2	Y	AD	N	N	N	>0.2	C
ENSG00000143502	SUSD4	N	N	N	3	N	NA	N	N	N	>0.2	C
ENSG00000178395	C1orf65	N	N	N	2	N	NA	N	NA	N	NA	NA
ENSG00000203697	CAPN8	Y	N	N	1	N	NA	N	N	N	<0.2	C
ENSG00000162909	CAPN2	Y	N	Y	2	Y	NA	N	Y	Y	<0.2	D
ENSG00000143514	TP53BP2	Y	N	Y	2	N	NA	Y	Y	N	<0.2	D
ENSG00000269358	AC138393.1	N	Y	N	NA	N	NA	N	NA	N	NA	NA
ENSG00000143756	FBXO28	N	N	N	2	N	NA	N	NA	Y	<0.2	C
ENSG00000143753	DEGS1	N	N	N	2	N	NA	N	NA	N	<0.2	D
ENSG00000143748	NVL	N	N	Y	2	N	NA	N	NA	N	<0.2	NA
ENSG00000269078	AC092809.1	N	Y	N	NA	N	NA	N	NA	N	NA	NA
ENSG00000143771	CNIH4	N	N	Y	3	N	NA	N	NA	N	<0.2	NA
ENSG00000162923	WDR26	N	N	Y	2	N	NA	N	NA	Y	<0.2	D
ENSG00000143786	CNIH3	Y	N	N	3	Y	NA	N	NA	N	<0.2	C
ENSG00000185842	DNAH14	N	N	N	1	N	NA	N	NA	Y	<0.2	C
ENSG00000143815	LBR	Y	N	N	2	Y	AD	N	Y	Y	<0.2	D
ENSG00000203691	AC092811.1	N	N	N	NA	N	NA	N	NA	N	NA	B
ENSG00000154380	ENAH	Y	N	N	2	Y	NA	N	NA	Y	<0.2	NA
ENSG00000143742	SRP9	N	N	N	2	N	NA	N	NA	Y	NA	NA
ENSG00000143819	EPHX1	N	N	N	3	Y	AD	N	N	Y	<0.2	D
ENSG00000196187	TMEM63A	Y	N	Y	2	N	NA	N	NA	N	<0.2	D
ENSG00000243709	LEFTY1	N	Y	N	1	N	NA	N	NA	N	<0.2	C
ENSG00000255835	RP4-559A3.7	N	Y	N	NA	N	NA	N	NA	N	NA	C
ENSG00000143811	PYCR2	N	Y	N	1	N	NA	N	NA	N	>0.2	D
ENSG00000143768	LEFTY2	N	Y	N	2	Y	NA	N	NA	Y	<0.2	D
ENSG00000143751	SDE2	N	N	N	3	N	NA	N	NA	N	>0.2	B
ENSG00000163041	H3F3A	N	N	N	3	N	NA	N	Y	Y	NA	NA
ENSG00000182827	ACBD3	Y	N	N	2	N	NA	N	NA	N	<0.2	NA
ENSG00000185155	MIXL1	N	N	Y	1	N	NA	N	NA	N	>0.2	NA
ENSG00000183814	LIN9	N	N	N	3	N	NA	N	Y	Y	<0.2	D
ENSG00000143799	PARP1	N	N	N	2	Y	NA	N	Y	Y	<0.2	D
ENSG00000203685	C1orf95	N	N	N	3	N	NA	N	NA	N	<0.2	C
ENSG00000143772	ITPKB	Y	N	N	3	N	NA	N	Y	N	<0.2	D
ENSG00000143801	PSEN2	Y	N	N	2	Y	AD	N	Y	Y	<0.2	NA
ENSG00000163050	ADCK3	Y	N	N	2	Y	AR	N	NA	N	<0.2	NA
ENSG00000143776	CDC42BPA	Y	N	N	3	N	NA	N	NA	N	<0.2	D
ENSG00000181450	ZNF678	N	Y	N	3	N	NA	N	NA	N	NA	D
ENSG00000143740	SNAP47	N	N	Y	2	N	NA	N	NA	N	>0.2	C
ENSG00000081692	JMJD4	N	N	Y	1	N	NA	N	NA	N	<0.2	NA
ENSG00000185888	PRSS38	N	Y	Y	3	N	NA	N	NA	N	<0.2	D
ENSG00000143816	WNT9A	N	N	Y	3	Y	NA	N	Y	N	NA	C
ENSG00000154342	WNT3A	Y	N	Y	1	Y	NA	N	Y	N	NA	D
ENSG00000143761	ARF1	N	N	Y	2	Y	NA	N	NA	Y	NA	NA
ENSG00000143793	C1orf35	N	N	Y	1	N	NA	N	NA	N	<0.2	D
ENSG00000162910	MRPL55	N	N	Y	3	N	NA	N	NA	Y	>0.2	C
ENSG00000143774	GUK1	N	N	Y	3	N	NA	N	N	N	>0.2	NA
ENSG00000198835	GJC2	N	N	Y	1	Y	AR	N	Y	Y	NA	B
ENSG00000203684	C1orf148	N	N	Y	NA	N	NA	N	NA	N	NA	NA
ENSG00000181873	IBA57	N	N	Y	1	N	NA	N	NA	N	<0.2	D
ENSG00000162913	C1orf145	N	N	Y	NA	N	NA	N	NA	N	NA	NA
ENSG00000154358	OBSCN	N	N	Y	3	Y	NA	N	NA	N	<0.2	D
ENSG00000154370	TRIM11	N	Y	Y	2	N	NA	N	NA	N	<0.2	C
ENSG00000162931	TRIM17	N	Y	Y	2	Y	NA	N	NA	N	>0.2	C
ENSG00000168148	HIST3H3	N	N	Y	3	Y	NA	N	NA	Y	<0.2	B
ENSG00000181218	HIST3H2A	N	Y	Y	2	N	NA	N	NA	Y	<0.2	D
ENSG00000196890	HIST3H2BB	N	Y	Y	3	N	NA	N	NA	Y	NA	D
ENSG00000168159	RNF187	N	N	Y	1	N	NA	N	NA	N	NA	D
ENSG00000116574	RHOU	Y	N	N	2	Y	NA	N	NA	Y	<0.2	NA
ENSG00000177800	TMEM78	N	N	N	NA	N	NA	N	NA	N	NA	NA
ENSG00000168118	RAB4A	Y	N	N	3	Y	NA	N	NA	N	<0.2	D
ENSG00000213029	SPHAR	N	N	N	NA	N	NA	N	NA	N	NA	D
ENSG00000154429	CCSAP	N	N	N	1	N	NA	N	NA	N	>0.2	C
ENSG00000143632	ACTA1	Y	N	N	3	Y	AD	N	Y	Y	<0.2	C
ENSG00000069248	NUP133	N	N	N	2	N	NA	N	N	Y	<0.2	NA
ENSG00000135776	ABCB10	N	N	N	2	Y	NA	N	NA	Y	<0.2	D
ENSG00000135801	TAF5L	N	N	N	3	N	NA	N	NA	Y	<0.2	D
ENSG00000135763	URB2	N	N	N	2	N	NA	N	NA	N	>0.2	B
ENSG00000143641	GALNT2	Y	N	N	2	Y	NA	N	NA	Y	<0.2	NA
ENSG00000268888	AL691479.2	N	Y	N	NA	N	NA	N	NA	N	NA	NA
ENSG00000177614	PGBD5	N	N	N	3	N	NA	N	NA	N	<0.2	B
ENSG00000135775	COG2	N	N	N	2	N	NA	N	NA	Y	<0.2	C
ENSG00000135744	AGT	Y	N	N	2	Y	AR	N	Y	N	>0.2	D
ENSG00000135773	CAPN9	Y	N	N	3	Y	NA	N	N	N	<0.2	B
ENSG00000119280	C1orf198	N	N	N	2	N	NA	N	NA	N	<0.2	NA
ENSG00000143643	TTC13	N	N	N	2	N	NA	N	NA	N	<0.2	C
ENSG00000173409	ARV1	N	N	N	1	N	NA	N	NA	N	<0.2	D
ENSG00000182118	FAM89A	N	N	N	1	N	NA	N	NA	N	NA	C
ENSG00000119283	TRIM67	Y	N	N	3	N	NA	N	NA	N	<0.2	C
ENSG00000143633	C1orf131	N	N	N	2	N	NA	N	N	N	NA	C
ENSG00000116906	GNPAT	N	N	N	2	Y	AR	N	Y	Y	<0.2	NA
ENSG00000116903	EXOC8	N	N	N	1	Y	NA	N	NA	Y	<0.2	C
ENSG00000010072	SPRTN	N	N	N	2	N	NA	N	NA	N	<0.2	NA
ENSG00000135766	EGLN1	Y	N	N	2	Y	AD	N	Y	Y	<0.2	NA
ENSG00000116918	TSNAX	N	Y	Y	1	N	NA	N	NA	Y	<0.2	D
ENSG00000162946	DISC1	N	N	N	3	Y	AD	N	N	Y	>0.2	B
ENSG00000116991	SIPA1L2	Y	N	N	3	N	NA	N	NA	N	<0.2	D
ENSG00000212916	KIAA1383	N	N	Y	3	N	NA	N	NA	N	>0.2	D
ENSG00000135778	NTPCR	N	N	Y	1	N	NA	N	NA	N	<0.2	B
ENSG00000135749	PCNXL2	Y	N	N	2	Y	NA	N	NA	N	<0.2	B
ENSG00000143674	MLK4	Y	N	N	3	Y	NA	Y	NA	N	<0.2	B
ENSG00000135750	KCNK1	Y	N	N	1	N	NA	N	N	N	<0.2	D
ENSG00000183780	SLC35F3	N	N	N	3	N	NA	N	NA	N	<0.2	B
ENSG00000168275	COA6	N	N	N	2	N	NA	N	NA	Y	<0.2	NA
ENSG00000059588	TARBP1	N	N	N	2	N	NA	N	NA	N	<0.2	D
ENSG00000168264	IRF2BP2	Y	N	Y	1	N	NA	N	NA	N	<0.2	D
ENSG00000173726	TOMM20	Y	N	N	1	N	NA	N	N	Y	<0.2	NA
ENSG00000188739	RBM34	N	N	N	2	N	NA	N	NA	N	>0.2	D
ENSG00000054267	ARID4B	Y	N	N	2	N	NA	N	Y	Y	<0.2	D
ENSG00000152904	GGPS1	N	N	Y	1	N	NA	N	N	N	<0.2	C
ENSG00000116957	TBCE	N	N	Y	1	Y	AR	N	NA	Y	<0.2	D
ENSG00000162885	B3GALNT2	N	N	Y	1	N	NA	N	NA	N	>0.2	C
ENSG00000168243	GNG4	N	N	N	3	N	NA	N	NA	Y	<0.2	D
ENSG00000143669	LYST	N	N	N	2	Y	AR	N	NA	N	<0.2	D
ENSG00000116962	NID1	Y	N	N	3	Y	NA	N	N	Y	<0.2	C
ENSG00000077585	GPR137B	Y	N	N	3	N	NA	N	NA	N	<0.2	C
ENSG00000086619	ERO1LB	Y	N	N	3	N	NA	N	N	N	<0.2	D
ENSG00000186197	EDARADD	N	N	N	3	Y	AR	N	NA	Y	>0.2	NA
ENSG00000116977	LGALS8	N	N	Y	3	Y	NA	N	N	N	<0.2	NA
ENSG00000119285	HEATR1	N	N	Y	2	N	NA	N	NA	N	<0.2	D
ENSG00000077522	ACTN2	Y	N	N	3	Y	NA	Y	NA	Y	<0.2	C
ENSG00000116984	MTR	N	N	N	3	Y	AR	N	Y	Y	<0.2	D
ENSG00000198626	RYR2	Y	N	N	3	Y	AD	N	Y	Y	<0.2	C
ENSG00000116996	ZP4	N	Y	Y	3	N	NA	N	NA	N	>0.2	NA
ENSG00000133019	CHRM3	Y	N	N	3	Y	NA	N	N	N	<0.2	B
ENSG00000155816	FMN2	Y	N	N	3	Y	NA	N	N	N	<0.2	C
ENSG00000268365	AL646016.1	N	N	N	NA	N	NA	N	NA	N	NA	NA
ENSG00000180875	GREM2	Y	N	N	3	N	NA	N	NA	N	NA	C
ENSG00000182901	RGS7	Y	N	N	3	Y	NA	N	N	Y	<0.2	B
ENSG00000091483	FH	N	N	N	2	Y	AD	N	Y	Y	<0.2	NA
ENSG00000117009	KMO	N	N	N	3	Y	NA	N	NA	N	<0.2	NA
ENSG00000054277	OPN3	N	N	N	1	N	NA	N	NA	N	<0.2	NA
ENSG00000203668	CHML	N	Y	N	2	Y	NA	N	NA	Y	<0.2	B
[truncated: 18,438 more rows]
